# Supplementary material for: A mild and efficient method for the synthesis of pyrroles using MIL-53(Al) as a catalyst under solvent-free sonication
Source: Royal Society of Chemistry journal article supplement (doi:10.1039/c9ra01071h), 2019-01-01
Supplement: c9ra01071h1.pdf [file c9ra01071h1.pdf]

## Supporting information

For

### **A mild and efficient method for the synthesis of pyrroles using MIL-53(Al) as a catalyst under solvent-free sonication.**

Hai Truong Nguyen,<sup>a</sup> Linh Ho Thuy Nguyen,<sup>a,b</sup> Tan Le Hoang Doan,<sup>a,b,\*</sup> and Phuong Hoang Tran<sup>a,\*</sup>

<sup>a</sup>Faculty of Chemistry, University of Science, Vietnam National University – Ho Chi Minh City (VNU-HCM), Ho Chi Minh City 721337, Vietnam

<sup>b</sup>Center for Innovative Materials and Architectures (INOMAR), Vietnam National University – Ho Chi Minh City (VNU-HCM), Ho Chi Minh City 721337, Vietnam

\*To whom correspondence should be addressed: [thphuong@hcmus.edu.vn](mailto:thphuong@hcmus.edu.vn),

[dlhtan@inomar.edu.vn](mailto:dlhtan@inomar.edu.vn)

## Table of contents

|                                                                              |                |
|------------------------------------------------------------------------------|----------------|
| <b>Section S1.</b> Materials                                                 | <b>S1</b>      |
| <b>Section S2.</b> Synthesis and Characterization of MIL-53(Al)              | <b>S2-S6</b>   |
| <b>Section S3.</b> Optimization of the reaction condition                    | <b>S7-S9</b>   |
| <b>Section S4.</b> Spectral data                                             | <b>S10-S16</b> |
| <b>Section S5.</b> <sup>1</sup> H, <sup>13</sup> C NMR and HRMS spectroscopy | <b>S7-S51</b>  |
| <b>Section S6.</b> References                                                | <b>S52</b>     |

## Section S1. Materials

Aniline (ACS reagent,  $\geq 99.5\%$ ), *o*-toluidine (assay  $\geq 99\%$ ), 3,5-dichloroaniline (assay  $\geq 98\%$ ), 2,5-dichloroaniline (assay  $\geq 99\%$ ), 3,4-dichloroaniline (assay  $\geq 99\%$ ), 2,5-dibromoaniline (assay  $\geq 98\%$ ), triethylenetetramine (assay  $\geq 97.0\%$  (T)), tetraethylenepentamine (technical grade), phenylhydrazine (assay 97%), 2,4-dinitrophenylhydrazine (reagent grade, 97%), 4-nitroaniline (assay  $\geq 99\%$ ), 4-nitro-*o*-phenylenediamine (assay 98%), 2-amino-4-nitrophenol (assay  $\geq 99.0\%$  (NT)), 2-amino-*p*-cresol (assay 97%), 4-aminobenzonitrile (assay 98%), 4-iodoaniline (assay 98%), 2-aminobiphenyl (assay 97%), methyl 4-aminobenzoate (assay 98%), and 4-aminophenol (assay 99%) were purchased from Sigma-Aldrich. Acetylacetone (analysis EMSURE®), anhydrous glycerol (excipient EMPROVE®), anhydrous oxalic acid (for synthesis), and TLC (silica gel 60 F254) were obtained from Merck. Silica gel 230–400 mesh (for flash chromatography) was obtained from Merck. Ethyl acetate (purity  $\geq 99.5\%$ ), *n*-hexane, and chloroform (purity  $\geq 99\%$ ) were obtained from Xilong Chemical Co., Ltd (China). Chloroform-*d*, 99.8 Atom %D, stab. with Ag was obtained from Armar (Switzerland). All starting materials, reagents and solvents were used without further purification.

**Section S2:** Characterization of MIL-53(Al)

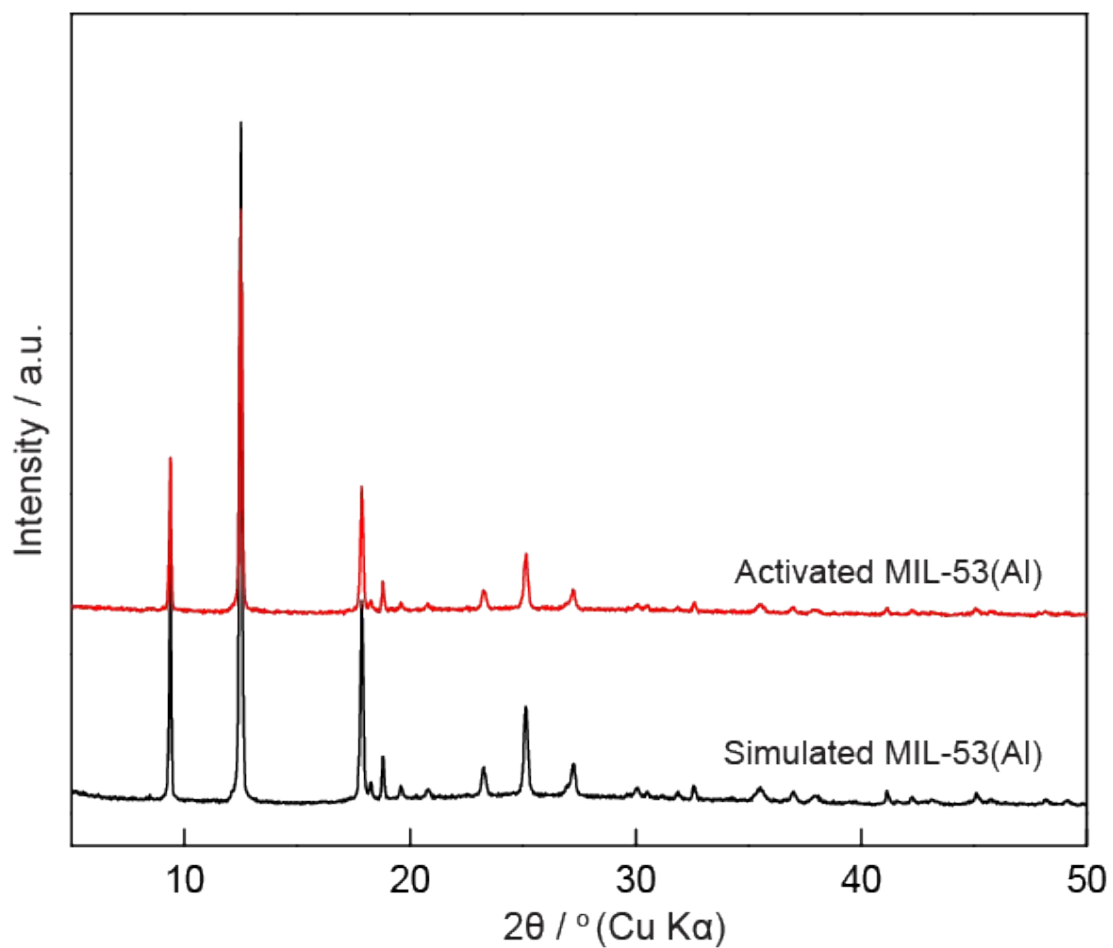

**Fig. S1.** PXRD analysis of MIL-53(Al). The calculated pattern from single crystal data (black) is compared to the activated powder sample (red).

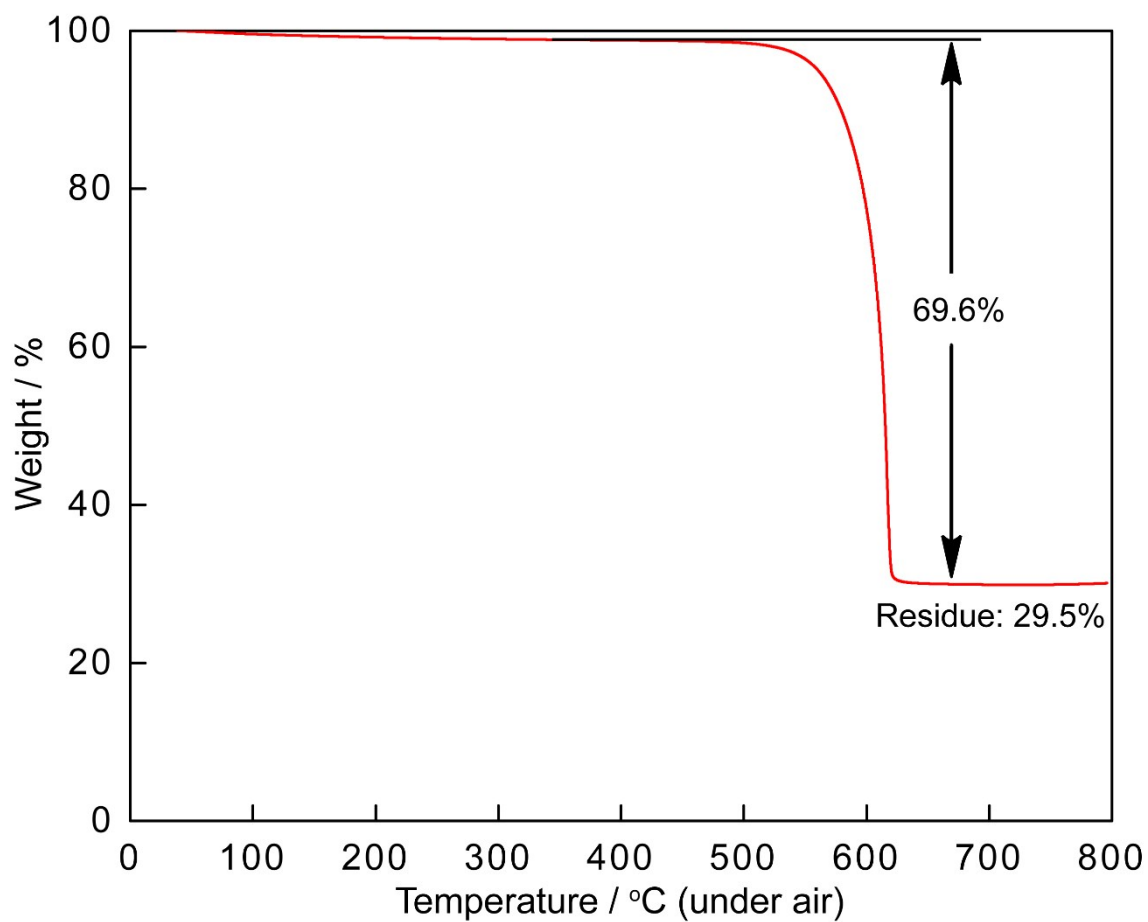

**Fig. S2.** Thermal gravimetric analysis of activated MIL-53(Al) under airflow.

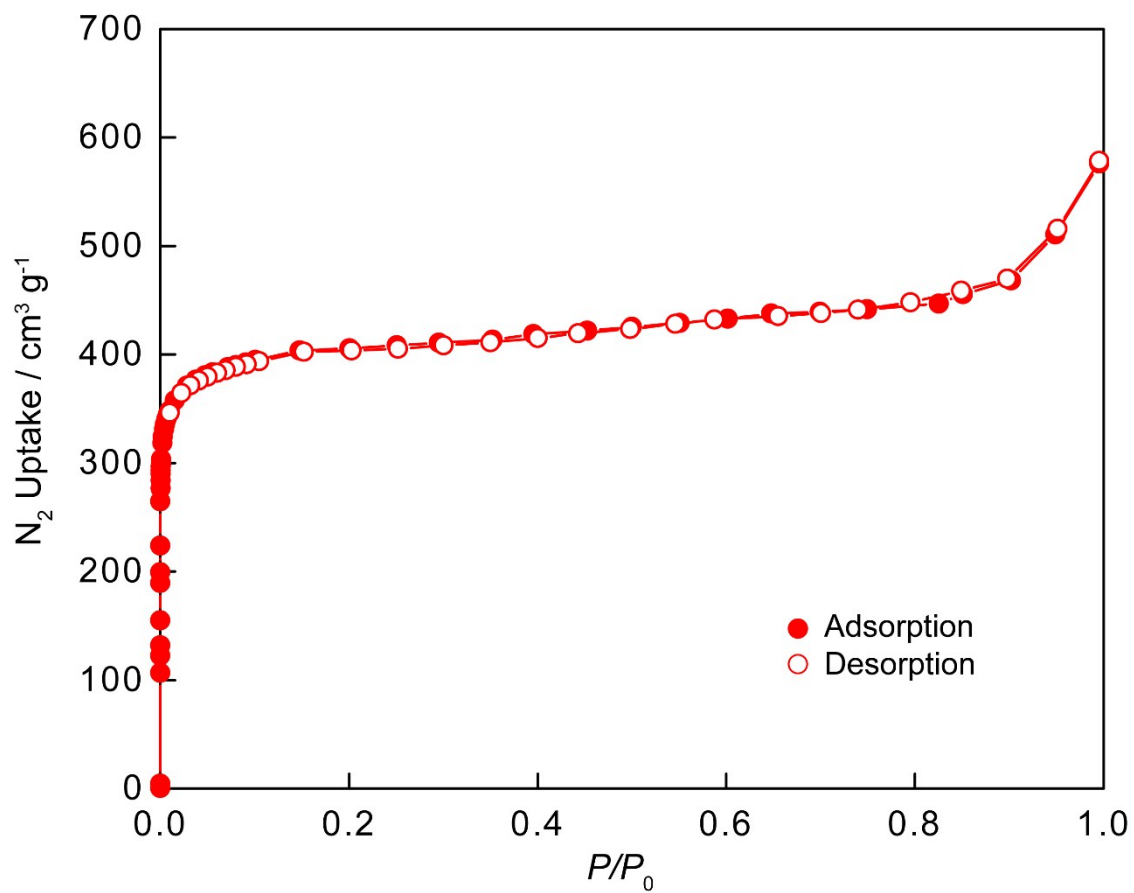

**Fig. S3.**  $N_2$  isotherm at 77 K for activated MIL-53(Al). Closed and open circles represent the adsorption and desorption branches, respectively.

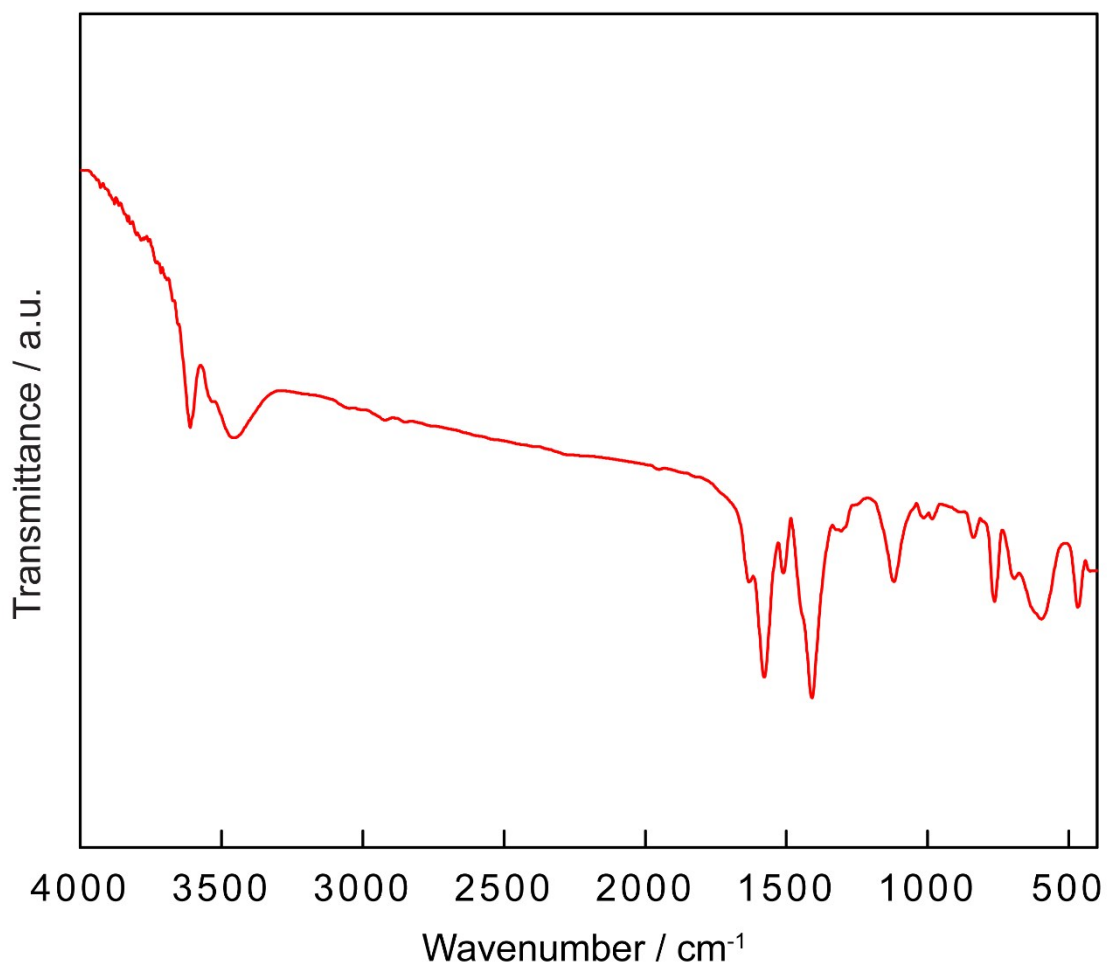

**Fig. S4.** Infrared spectra of activated MIL-53(Al) (red) in dry KBr.

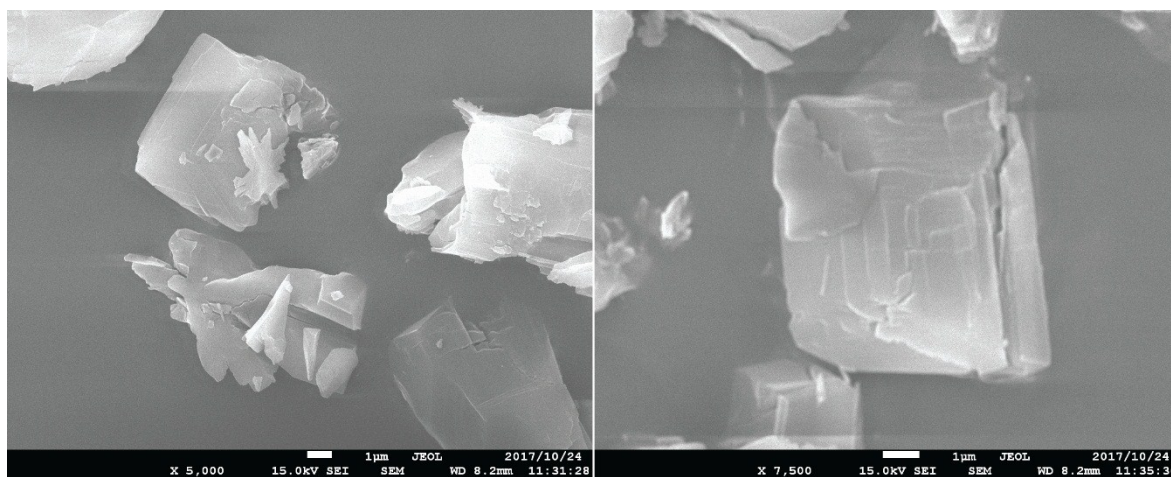

**Fig. S5.** SEM images of activated MIL-53(Al).

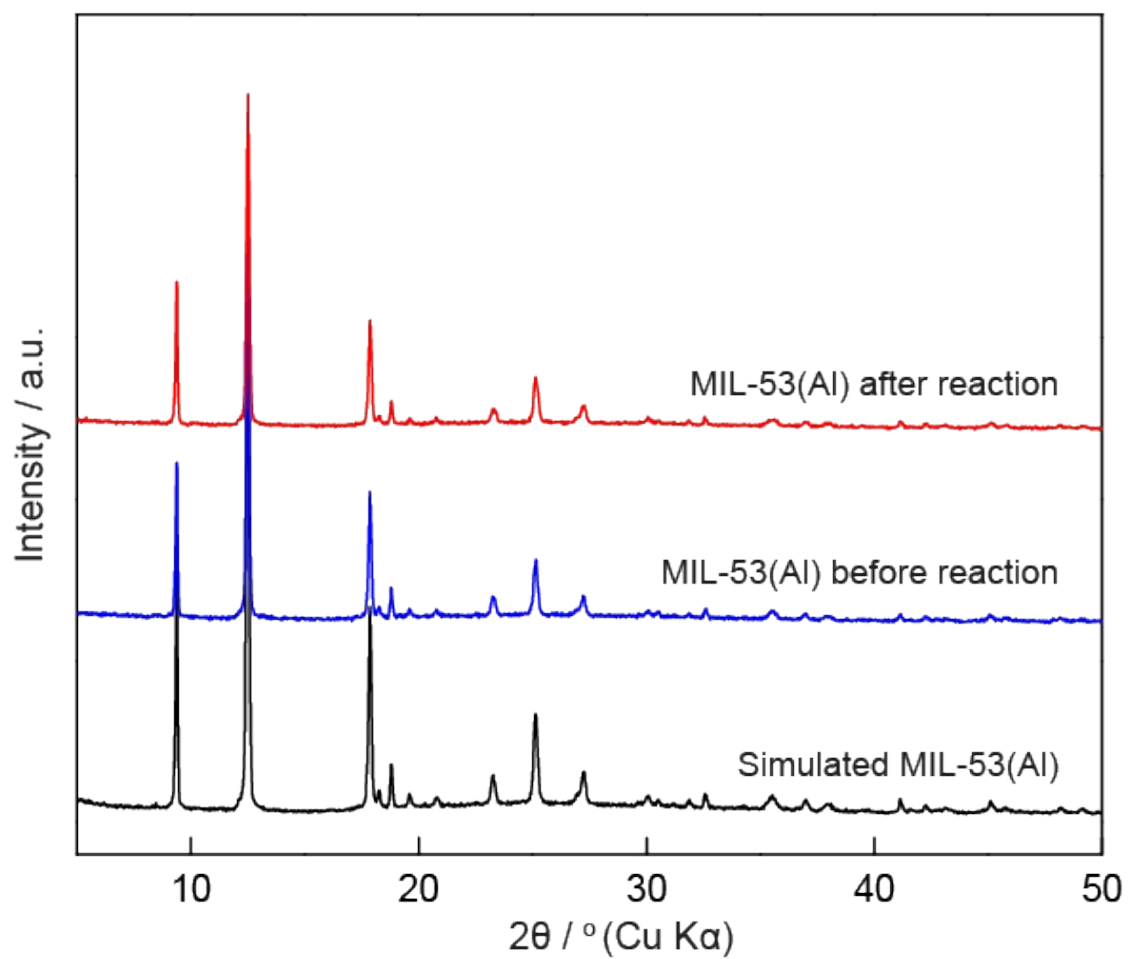

**Fig. S6.** PXRD analysis of MIL-53(Al) before (blue) and after (red) 4th time recycling.

### Section S3. Optimization of the reaction condition

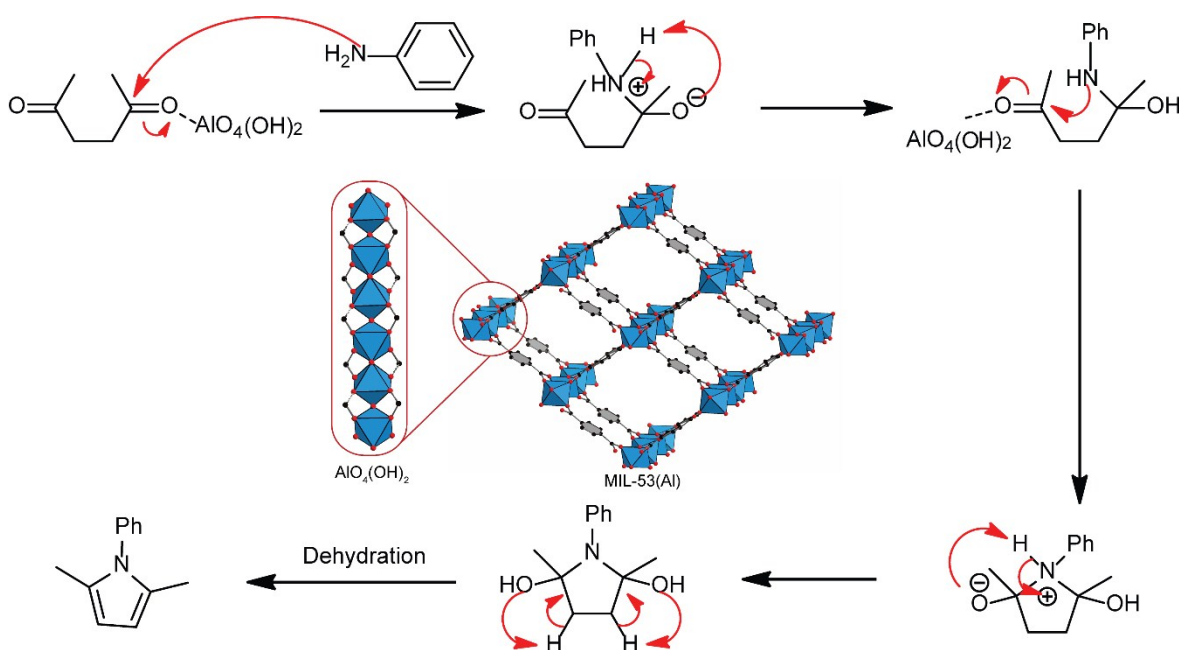

**Scheme S1.** Proposed reaction mechanism

**Table S1.** Effect of the reaction time.<sup>a</sup>

| Entry    | Time (min) | Isolated yield (%) <sup>b</sup> |
|----------|------------|---------------------------------|
| 1        | 1          | 45                              |
| 2        | 5          | 53                              |
| 3        | 10         | 55                              |
| <b>4</b> | <b>15</b>  | <b>96</b>                       |
| 5        | 30         | 95                              |
| 6        | 45         | 97                              |

<sup>a</sup>Reaction condition: Aniline (1.0 mmol), acetonylacetone (1.2 mmol) in the presence of MIL-53(Al)-catalyzed (5 %mol) without solvent.

The effect of catalyst amount on the model reaction was also carried out by varying the MIL-53(Al) amount to 0 %mol, 1 %mol, 5 %mol, 7 %mol, 10 %mol and 15 %mol. The optimum amount of catalyst for the model reaction was found to be 5 %mol, about 96% (Table 2, entry 3). The effect of the molar ratio of substrates on the model reaction was investigated in Table 3. As can be seen from Table 3, the molar ratio of substrates had a remarkable effect on the yield. When the ratio of



aniline and acetonylacetone was 1:1.2, the product was obtained in the best yield of 96% (Table 3, entry 3). Thus, we chose the molar ratio as the optimal ratio for further studies.

**Table S2.** Effect of the ratio of MIL-53(Al) with solventless.<sup>a</sup>

| Entry    | Amount of MIL-53(Al) (mol%) | Isolated yield (%) |
|----------|-----------------------------|--------------------|
| 1        | 0                           | 65                 |
| 2        | 1                           | 80                 |
| <b>3</b> | <b>5</b>                    | <b>96</b>          |
| 4        | 7                           | 96                 |
| 5        | 10                          | 90                 |
| 6        | 15                          | 90                 |

<sup>a</sup>Reaction condition: Aniline (1.0 mmol), acetonylacetone (1.2 mmol) in the presence of catalyst (%mol) without solvent.

**Table S3.** Effect of the ratio aniline/acetonylacetone.<sup>a</sup>

| Entry    | Molar ratios of reactants | Isolated yield (%) |
|----------|---------------------------|--------------------|
| 1        | 1:1                       | 80                 |
| 2        | 1:1.1                     | 87                 |
| <b>3</b> | <b>1:1.2</b>              | <b>96</b>          |
| 4        | 1:1.3                     | 96                 |
| 5        | 1:1.4                     | 96                 |
| 6        | 1:1.5                     | 97                 |
| 7        | 1:2                       | 98                 |
| 8        | 1:3                       | 98                 |
| 9        | 1:4                       | 98                 |
| 10       | 1:5                       | 98                 |

<sup>a</sup>Reaction condition: Aniline (1.0 mmol), acetonylacetone (mmol) in the presence of MIL-53(Al) (5 %mol) without solvent.

**Table S4.** Effect of various solvents.<sup>a</sup>

| Entry    | Solvent                       | Isolated yield (%) |
|----------|-------------------------------|--------------------|
| <b>1</b> | <b>None-solvent</b>           | <b>96</b>          |
| 2        | Dichloromethane               | 85                 |
| 3        | Tetrahydrofuran               | 79                 |
| 4        | Ethanol                       | 77                 |
| 5        | <i>n</i> -Butanol             | 75                 |
| 6        | <i>N,N</i> -Dimethylformamide | 82                 |
| 7        | Acetone                       | 90                 |
| 8        | Acetonitrile                  | 75                 |
| 9        | Dimethyl sulfoxide            | 80                 |
| 10       | Hexane                        | 83                 |
| 11       | Dioxane                       | 84                 |
| 12       | Toluene                       | 81                 |
| 13       | Cyclopentyl methyl ether      | 76                 |

<sup>a</sup>Reaction condition: Aniline (1.0 mmol), acetylacetone (1.2 mmol) and MIL-53(Al) (5 %mol) in the presence of solvent (1.5 mL).

## Section S4. Spectral data

### 2,5-Dimethyl-1-phenyl-1*H*-pyrrole<sup>1-6</sup>

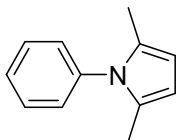

Yellow solid, mp 52-54 °C

<sup>1</sup>H NMR (500 MHz, CDCl<sub>3</sub>) δ 7.49 – 7.46 (t, *J* = 7.0 Hz, 2H), 7.43 – 7.40 (t, *J* = 7.5 Hz, 1H), 7.24 – 7.23 (d, *J* = 7.0 Hz, 2H), 5.93 (s, 2H), 2.06 (s, 6H).

<sup>13</sup>C NMR (125 MHz, CDCl<sub>3</sub>) δ 139.1, 129.0, 128.8, 128.3, 127.6, 105.6, 13.0.

GC-MS (EI, 70 eV) *m/z* 171 ([M]<sup>+</sup>)

### 2,5-Dimethyl-1-(*o*-tolyl)-1*H*-pyrrole<sup>1, 2, 4, 7</sup>

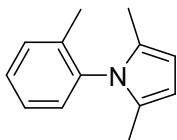

Yellow oil

<sup>1</sup>H NMR (500 MHz, CDCl<sub>3</sub>) δ 7.33 – 7.32 (m, 2H), 7.29 – 7.27 (m, 1H), 7.17 – 7.15 (d, *J* = 7.5 Hz, 2H), 5.91 (s, 2H), 1.94 (s, 3H), 1.92 (s, 6H).

<sup>13</sup>C NMR (125 MHz, CDCl<sub>3</sub>) δ 137.1, 130.7, 128.9, 128.3, 128.2, 126.6, 105.2, 29.7, 17.0, 12.5.

GC-MS (EI, 70 eV) *m/z* 185 ([M]<sup>+</sup>)

### 1-(4-Hydroxyphenyl)-2,5-dimethyl-1*H*-pyrrole<sup>7, 17, 19, 20</sup>

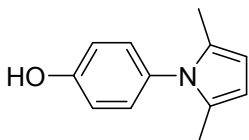

Yellow solid, mp 105-107 °C

<sup>1</sup>H-NMR (500 MHz, DMSO-*d*<sub>6</sub>) δ 9.66 (s, 1H), 7.01 – 6.98 (m, 2H), 6.85 – 6.82 (m, 2H), 5.71 (s, 2H), 1.90 (s, 6H).

<sup>13</sup>C-NMR (125 MHz, DMSO-*d*<sub>6</sub>) δ 157.2, 130.0, 129.5, 128.1, 116.1, 105.7, 13.3.

GC-MS (EI, 70 eV) *m/z* 187 ([M]<sup>+</sup>).

### 1-(2'-Hydroxy-5'-methylphenyl)-2,5-dimethyl-1H-pyrrole

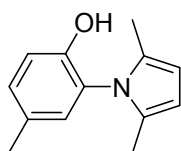

Black oil

$^1\text{H NMR}$  (500 MHz,  $\text{CDCl}_3$ ):  $\delta$  = 7.14 – 7.12 (dd,  $J$  = 2.0 Hz, 2.0 Hz, 1H), 6.96 – 6.95 (d,  $J$  = 8.5 Hz, 1H), 6.92 – 6.91 (d,  $J$  = 1.5 Hz, 1H), 5.94 (s, 2H), 5.08 (s, 1H), 2.31 (s, 3H), 1.98 (s, 6H).

$^{13}\text{C NMR}$  (125 MHz,  $\text{CDCl}_3$ )  $\delta$  150.4, 130.5, 130.1, 129.4, 129.0, 116.5, 115.9, 106.7, 20.4, 12.3.

HRMS (ESI)  $m/z$  calcd for  $[\text{M} + \text{H}]^+$   $\text{C}_{13}\text{H}_{16}\text{NO}^+$  202.1226, found 202.1201.

### 1-(2'-Hydroxy-5'-nitrophenyl)-2,5-dimethyl-1H-pyrrole

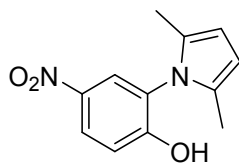

Orange solid, mp 167-170 °C

$^1\text{H NMR}$  (500 MHz,  $\text{CDCl}_3$ )  $\delta$  8.28 – 8.24 (dd,  $J$  = 2.5 Hz, 2.5 Hz, 1H), 8.09 – 8.08 (d,  $J$  = 3.0 Hz, 1H), 7.18 – 7.16 (d,  $J$  = 9.5 Hz, 1H), 5.99 (s, 2H), 1.99 (s, 6H).

$^{13}\text{C NMR}$  (125 MHz,  $\text{CDCl}_3$ )  $\delta$  158.7, 141.3, 129.1, 126.1, 125.7, 116.8, 107.9, 12.3.

HRMS (ESI)  $m/z$  calcd for  $[\text{M} + \text{H}]^+$   $\text{C}_{12}\text{H}_{13}\text{N}_2\text{O}_3^+$  233.0920, found 233.0939.

### 1-(2'-Amino-4'-nitrophenyl)-2,5-dimethyl-1H-pyrrole

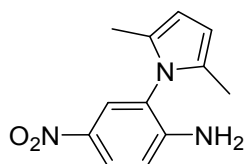

Yellow solid, m.p. = 128-130 °C

$^1\text{H NMR}$  (500 MHz,  $\text{CDCl}_3$ )  $\delta$  7.65 – 7.63 (m, 2H), 7.21 – 7.19 (d,  $J$  = 9.0 Hz, 1H), 5.97 (s, 2H), 3.82 (s, 2H), 1.97 (s, 6H).

$^{13}\text{C}$  NMR (125 MHz,  $\text{CDCl}_3$ )  $\delta$  145.1, 130.3, 130.2, 124.0, 118.0, 112.8, 109.8, 107.1, 12.2.

HRMS (ESI)  $m/z$  calcd for  $[\text{M} + \text{H}]^+$   $\text{C}_{12}\text{H}_{14}\text{N}_3\text{O}_2^+$  230.1049, found 230.1011.

**1-(3,5-Dichlorophenyl)-2,5-dimethyl-1H-pyrrole<sup>8</sup>**

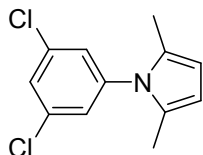

Orange solid, mp 79-81 °C

$^1\text{H}$  NMR (500 MHz,  $\text{CDCl}_3$ )  $\delta$  7.42 – 7.41 (t,  $J = 2.0$  Hz, 1H), 7.15 – 7.14 (d,  $J = 1.5$  Hz, 2H), 5.90 (s, 2H), 2.06 (s, 6H).

$^{13}\text{C}$  NMR (125 MHz,  $\text{CDCl}_3$ )  $\delta$  141.0, 135.2, 128.6, 128.6, 127.0, 106.7, 29.7, 13.0.

GC-MS (EI, 70 eV)  $m/z$  239 ( $[\text{M}]^+$ )

**1-(2,5-Dichlorophenyl)-2,5-dimethyl-1H-pyrrole<sup>9</sup>**

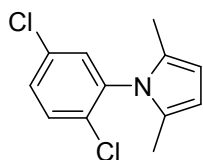

Black solid, mp 136-137 °C

$^1\text{H}$  NMR (500 MHz,  $\text{CDCl}_3$ )  $\delta$  7.51 – 7.50 (d,  $J = 8.5$  Hz, 1H), 7.42 – 7.39 (dd,  $J = 2.5$  Hz, 2.5 Hz, 1H), 7.36 – 7.35 (d,  $J = 2.5$  Hz, 1H), 5.97 (s, 2H), 2.01 (s, 6H).

$^{13}\text{C}$  NMR (125 MHz,  $\text{CDCl}_3$ )  $\delta$  138.1, 133.0, 132.7, 131.0, 130.8, 129.8, 128.6, 106.2, 12.5.

GC-MS (EI, 70 eV)  $m/z$  239 ( $[\text{M}]^+$ )

**1-(3,4-Dichlorophenyl)-2,5-dimethyl-1H-pyrrole<sup>1, 2, 4, 5</sup>**

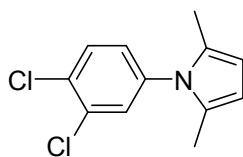

Yellow solid, mp 101-103 °C

**<sup>1</sup>H NMR** (500 MHz, CDCl<sub>3</sub>) δ 7.55 – 7.54 (d, *J* = 8.5 Hz, 1H), 7.35 (d, *J* = 2.5 Hz, 1H), 7.10 – 7.08 (m, 1H), 5.91 (s, 2H), 2.05 (s, 6H).

**<sup>13</sup>C NMR** (125 MHz, CDCl<sub>3</sub>) δ 138.5, 133.0, 132.0, 130.8, 130.2, 128.7, 127.6, 106.5, 13.0.

**GC-MS** (EI, 70 eV) *m/z* 239 ([M]<sup>+</sup>)

### 1-(2,5-Dibromophenyl)-2,5-dimethyl-1*H*-pyrrole

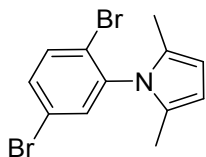

Yellow oil

**<sup>1</sup>H NMR** (500 MHz, CDCl<sub>3</sub>) δ 7.59 – 7.57 (d, *J* = 8.5 Hz, 1H), 7.47 – 7.44 (m, 2H), 5.92 (s, 2H), 1.97 (s, 6H).

**<sup>13</sup>C-NMR** (125 MHz, CDCl<sub>3</sub>) δ 140.0, 134.3, 133.6, 133.0, 128.4, 123.5, 121.3, 106.1, 12.6.

**GC-MS** (EI, 70 eV) *m/z* 326 ([M]<sup>+</sup>)

### 1-(4-Iodophenyl)-2,5-dimethyl-1*H*-pyrrole<sup>18, 19</sup>

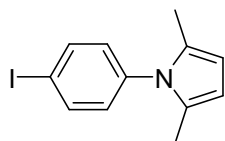

Yellow solid, mp 63-65 °C

**<sup>1</sup>H-NMR** (500 MHz, CDCl<sub>3</sub>) δ 7.80 – 7.79 (d, *J* = 8.5 Hz, 2H), 6.97 – 6.96 (d, *J* = 8.0 Hz, 2H), 5.90 (s, 2H), 2.03 (s, 6H).

**<sup>13</sup>C-NMR** (125 MHz, CDCl<sub>3</sub>) δ 138.8, 138.3, 130.2, 128.6, 106.2, 92.9, 13.0.

**GC-MS** (EI, 70 eV) *m/z* 297 ([M]<sup>+</sup>).

### 1-([1,1'-Biphenyl]-2-yl)-2,5-dimethyl-1*H*-pyrrole<sup>21</sup>

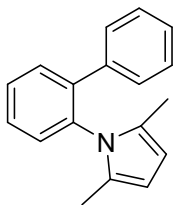

Yellow solid, mp 98-99 °C

**<sup>1</sup>H NMR** (500 MHz, CDCl<sub>3</sub>) δ 7.55 – 7.53 (dd, *J* = 1.5 Hz, 8.0 Hz, 1H), 7.48 – 7.45 (dt, *J* = 1.5 Hz, 1H), 7.43 – 7.39 (dt, *J* = 1.5 Hz, 1H), 7.25 – 7.22 (m, 4H), 7.01 – 6.99 (dd, *J* = 2.0 Hz, 2H), 5.76 (s, 2H), 1.84 (s, 6H).

**<sup>13</sup>C NMR** (125 MHz, CDCl<sub>3</sub>) δ 140.4, 138.7, 136.4, 130.82, 129.9, 128.5, 128.5, 128.3, 128.2, 128.0, 127.3, 105.8, 12.9.

**GC-MS** (EI, 70 eV) *m/z* 247 ([M]<sup>+</sup>)

**Methyl 4-(2,5-dimethyl-1H-pyrrol-1-yl)benzoate<sup>22-25</sup>**

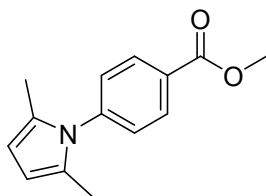

White solid, mp 100-102 °C

**<sup>1</sup>H NMR** (500 MHz, CDCl<sub>3</sub>) δ 8.16 – 8.13 (m, 2H), 7.30 – 7.27 (m, 2H), 5.92 (s, 2H), 3.96 (s, 3H), 2.05 (s, 6H).

**<sup>13</sup>C NMR** (125 MHz, CDCl<sub>3</sub>) δ 166.4, 143.2, 130.5, 129.3, 128.6, 128.1, 106.5, 52.3, 13.0.

**GC-MS** (EI, 70 eV) *m/z* 229 ([M]<sup>+</sup>)

**1-(4-Cyanophenyl)-2,5-Dimethyl-1H-pyrrole<sup>1, 2, 5, 7</sup>**

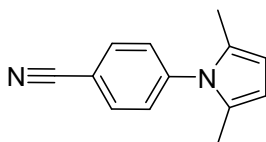

White solid, mp 93-94 °C

**<sup>1</sup>H NMR** (500 MHz, CDCl<sub>3</sub>) δ 7.79 – 7.77 (m, 2H), 7.35 – 7.33 (m, 2H), 5.94 (s, 2H), 2.05 (s, 6H).

$^{13}\text{C}$  NMR (125 MHz,  $\text{CDCl}_3$ )  $\delta$  143.1, 133.1, 129.0, 128.5, 118.2, 111.5, 107.2, 13.1.

GC-MS (EI, 70 eV)  $m/z$  196 ( $[\text{M}]^+$ )

**2,5-Dimethyl-1-(4-nitrophenyl)-1H-pyrrole**<sup>2, 4, 5, 7, 17</sup>

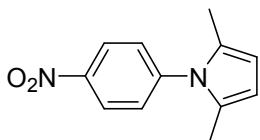

Yellow solid, mp 144-146 °C

$^1\text{H}$  NMR (500 MHz,  $\text{CDCl}_3$ )  $\delta$  8.35 – 8.34 (d,  $J = 9.0$  Hz, 2H), 7.40 – 7.38 (d,  $J = 9.0$  Hz, 2H), 5.96 (s, 2H), 2.07 (s, 6H).

$^{13}\text{C}$  NMR (125 MHz,  $\text{CDCl}_3$ )  $\delta$  146.8, 144.8, 128.8, 124.6, 109.0, 107.4, 29.7.

GC-MS (EI, 70 eV)  $m/z$  216 ( $[\text{M}]^+$ )

**N-(2,4-Dinitrophenyl)-2,5-dimethyl-1H-pyrrol-1-amine**<sup>10, 14-16</sup>

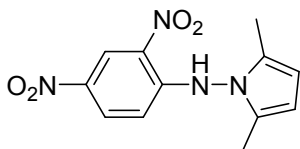

Yellow solid, mp 182-184 °C

$^1\text{H}$  NMR (500 MHz,  $\text{CDCl}_3$ )  $\delta$  9.96 (s, 1H), 9.19 – 9.18 (d,  $J = 2.5$  Hz, 1H), 8.27 – 8.24 (m, 1H), 6.22 – 6.20 (d,  $J = 9.5$  Hz, 1H), 5.94 (s, 2H), 2.08 (s, 6H).

$^{13}\text{C}$  NMR (125 MHz,  $\text{CDCl}_3$ )  $\delta$  148.7, 139.2, 130.9, 127.4, 123.5, 114.6, 105.7, 11.1.

**2,5-Dimethyl-N-phenyl-1H-pyrrol-1-amine**<sup>10-13</sup>

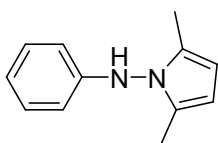

Yellow solid, mp 82-85 °C

$^1\text{H}$  NMR (500 MHz,  $\text{CDCl}_3$ )  $\delta$  7.32 – 7.29 (t,  $J = 9.0$  Hz, 2H), 6.92 – 6.90 (t,  $J = 7.5$  Hz, 1H), 6.86 – 6.83 (t,  $J = 7.0$  Hz, 1H), 6.47 – 6.46 (d,  $J = 7.5$  Hz, 2H), 6.32 (s, 1H), 5.87 (s, 2H), 2.14 (s, 6H).



$^{13}\text{C}$  NMR (125 MHz,  $\text{CDCl}_3$ )  $\delta$  142.4, 120.5, 118.6, 113.2, 112.0, 103.5, 14.8.

GC-MS (EI, 70 eV)  $m/z$  186 ( $[\text{M}]^+$ )

*N*<sup>1</sup>,*N*<sup>2</sup>-bis(2-(2,5-Dimethyl-1*H*-pyrrol-1-yl)ethyl)ethane-1,2-diamine

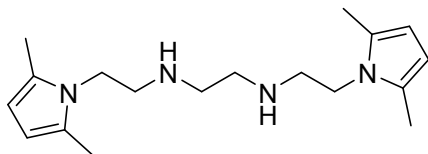

Yellow oil

$^1\text{H}$  NMR (500 MHz,  $\text{CDCl}_3$ )  $\delta$  5.77 – 5.76 (d,  $J = 5.0$  Hz, 4H), 3.88 – 3.85 (t,  $J = 7.0$  Hz, 4H), 2.83 – 2.81 (t,  $J = 7.0$  Hz, 4H), 2.71 (s, 4H), 2.23 (s, 12H).

$^{13}\text{C}$  NMR (125 MHz,  $\text{CDCl}_3$ )  $\delta$  127.6, 105.4, 49.7, 49.0, 43.7, 12.6.

HRMS (ESI)  $m/z$  calcd for  $[\text{M} + \text{H}]^+$   $\text{C}_{18}\text{H}_{31}\text{N}_4^+$  303.2543, found 303.2575.

Section S5.  $^1\text{H}$ ,  $^{13}\text{C}$  NMR and HRMS spectroscopy

$^1\text{H}$  NMR,  $^{13}\text{C}$  NMR, and GC-MS of 2,5-Dimethyl-1-phenyl-1H-pyrrole

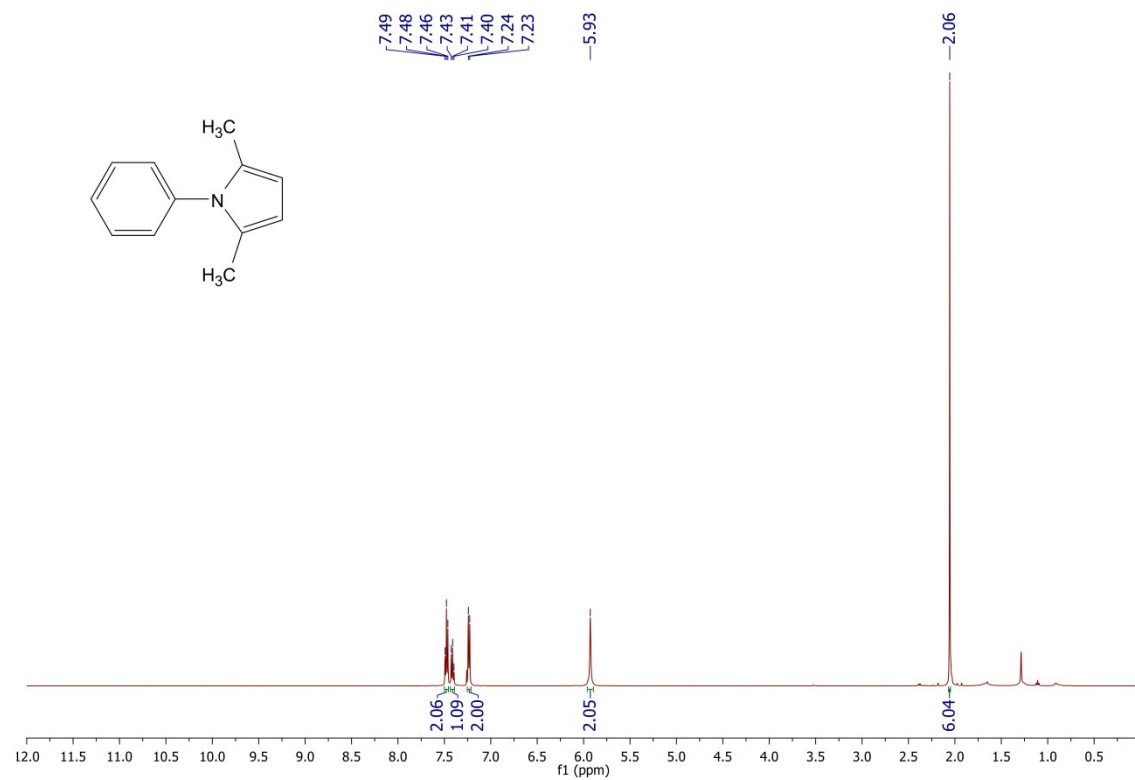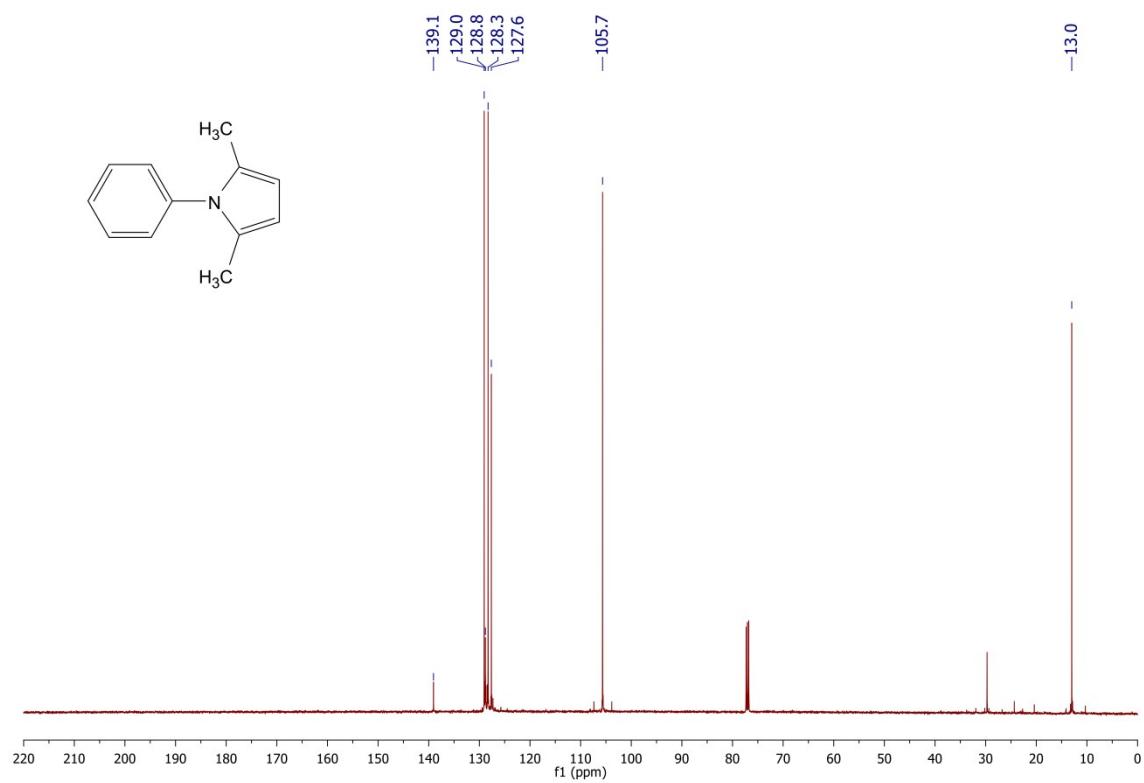

File :C:\GC-MS\2016\08.01.2016\ANILINE-ACETONYLACTONE-DES-SA-80C-2  
... H.D  
Operator : TRUONG HAI  
Instrument : GCMSD  
Acquired : 1 Aug 2016 16:44 using AcqMethod ACYLATION-SHORT-DELAY-3MIN.M  
Sample Name: ANILINE-ACETONYLACTONE-DES-SA-80C-2H  
Misc Info :

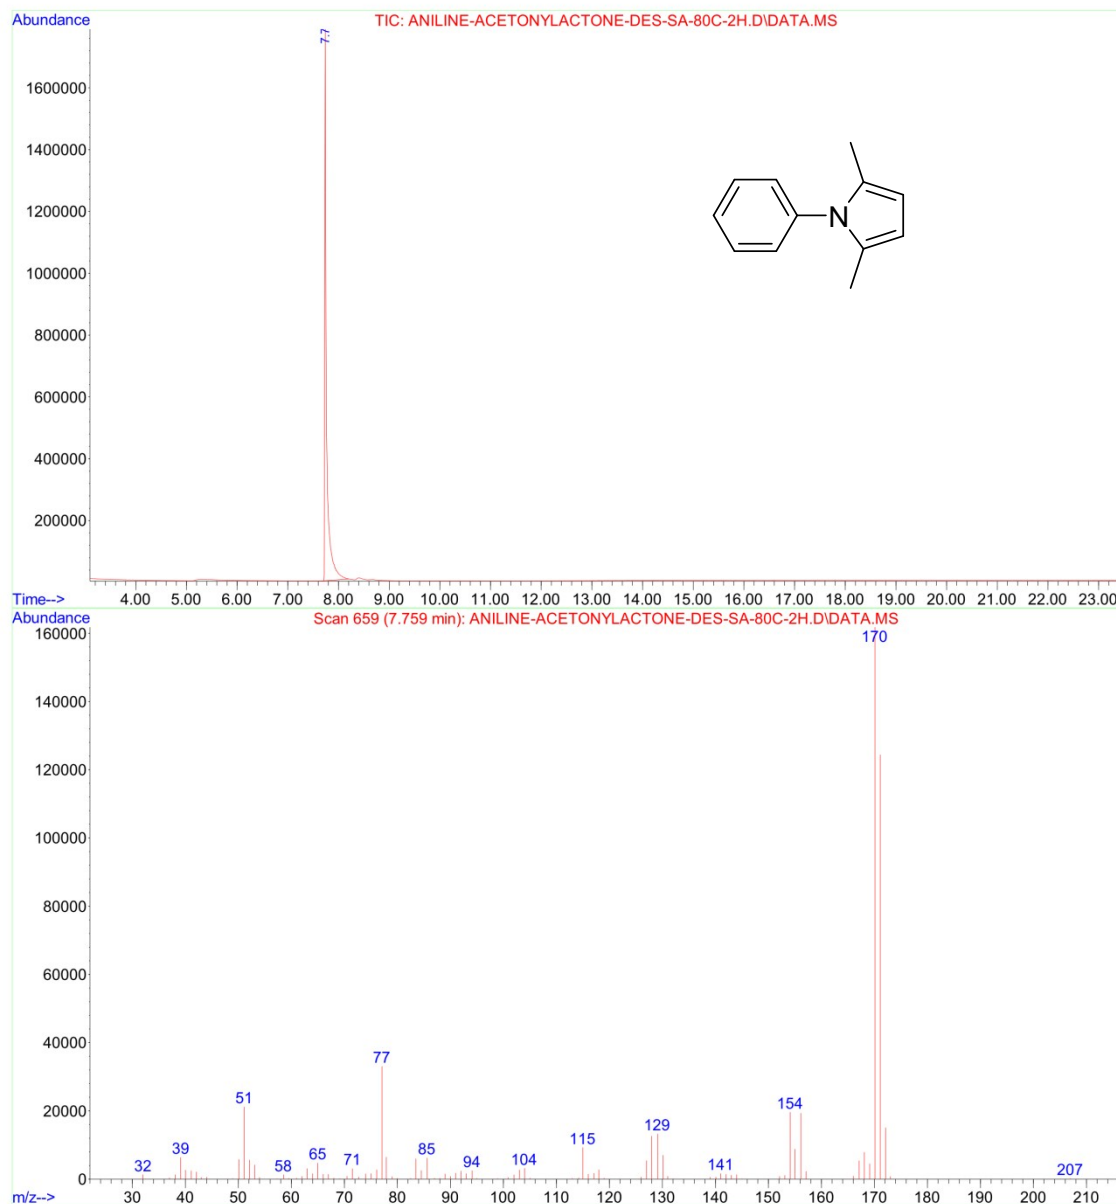

# $^1\text{H}$ NMR, $^{13}\text{C}$ NMR, and GC-MS of 2,5-Dimethyl-1-(*o*-tolyl)-1*H*-pyrrole

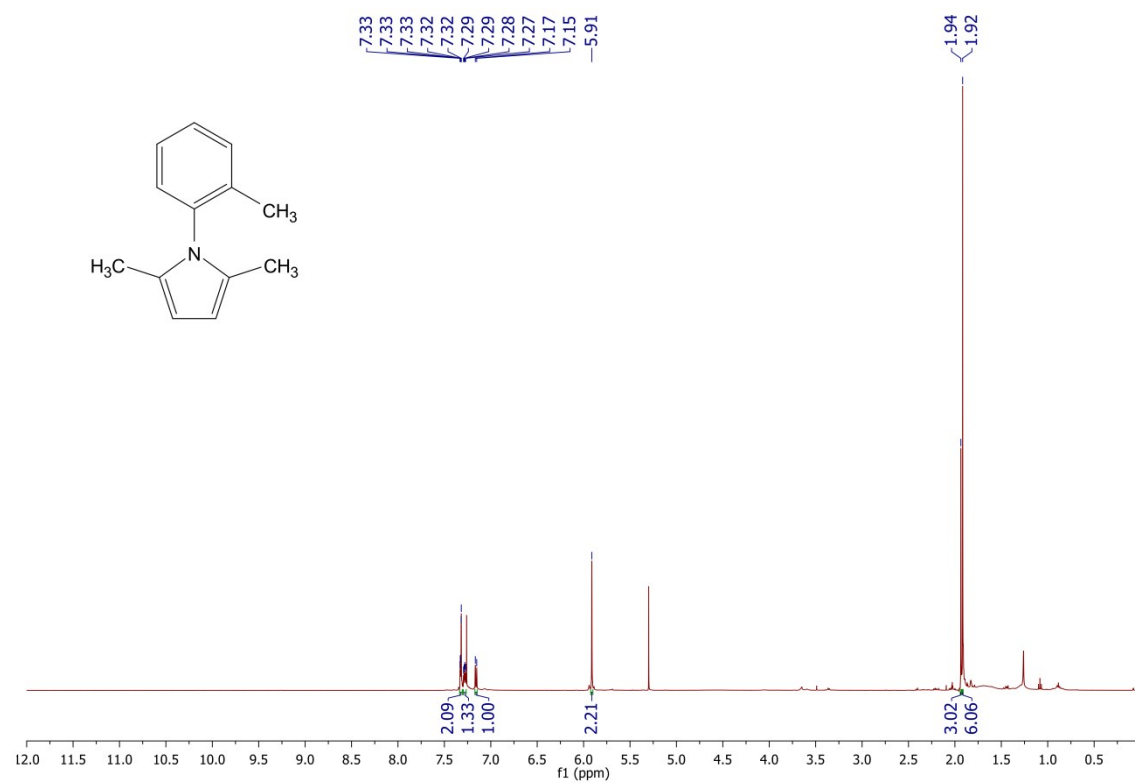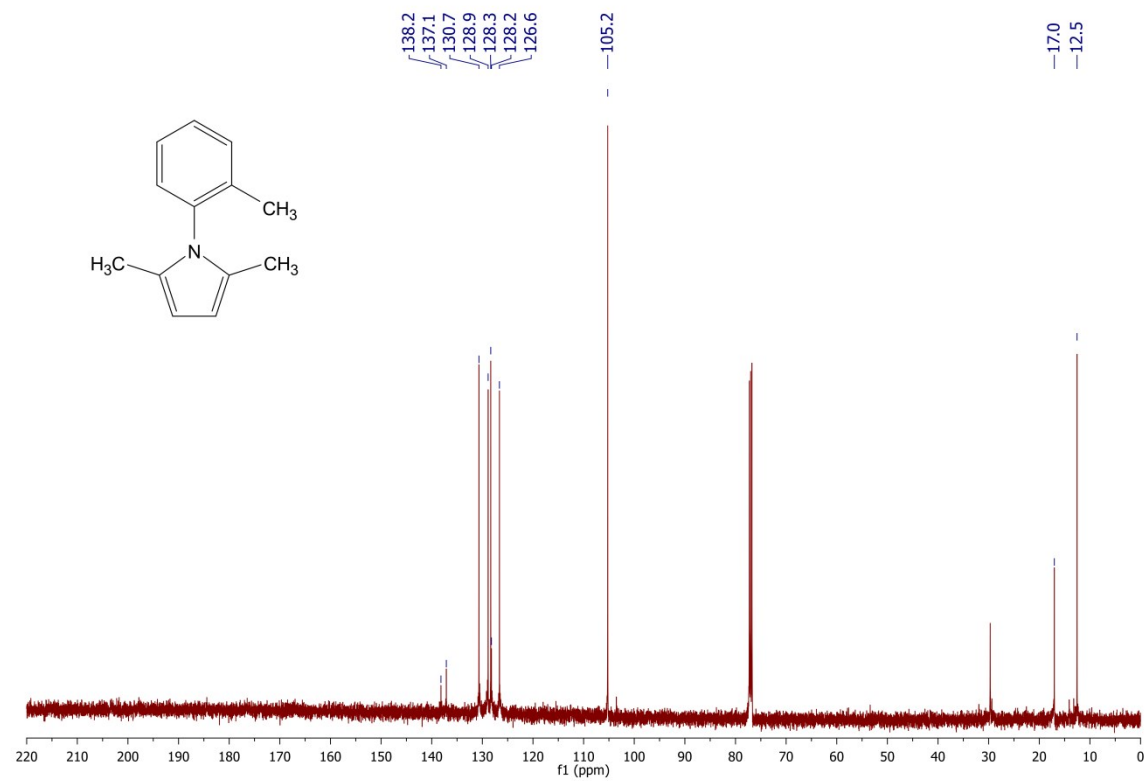

File : C:\GC-MS\2016\08.03.2016\O-TOLUIDIN-ACETONYL-DES-SA-80-2H.D  
Operator : TRUONG HAI  
Acquired : 4 Aug 2016 11:12 using AcqMethod ACYLATION-SHORT-DELAY-3MIN.M  
Instrument : GCMSD  
Sample Name: O-TOLUIDIN-ACETONYL-DES-SA-80-2H  
Misc Info :  
Vial Number: 3

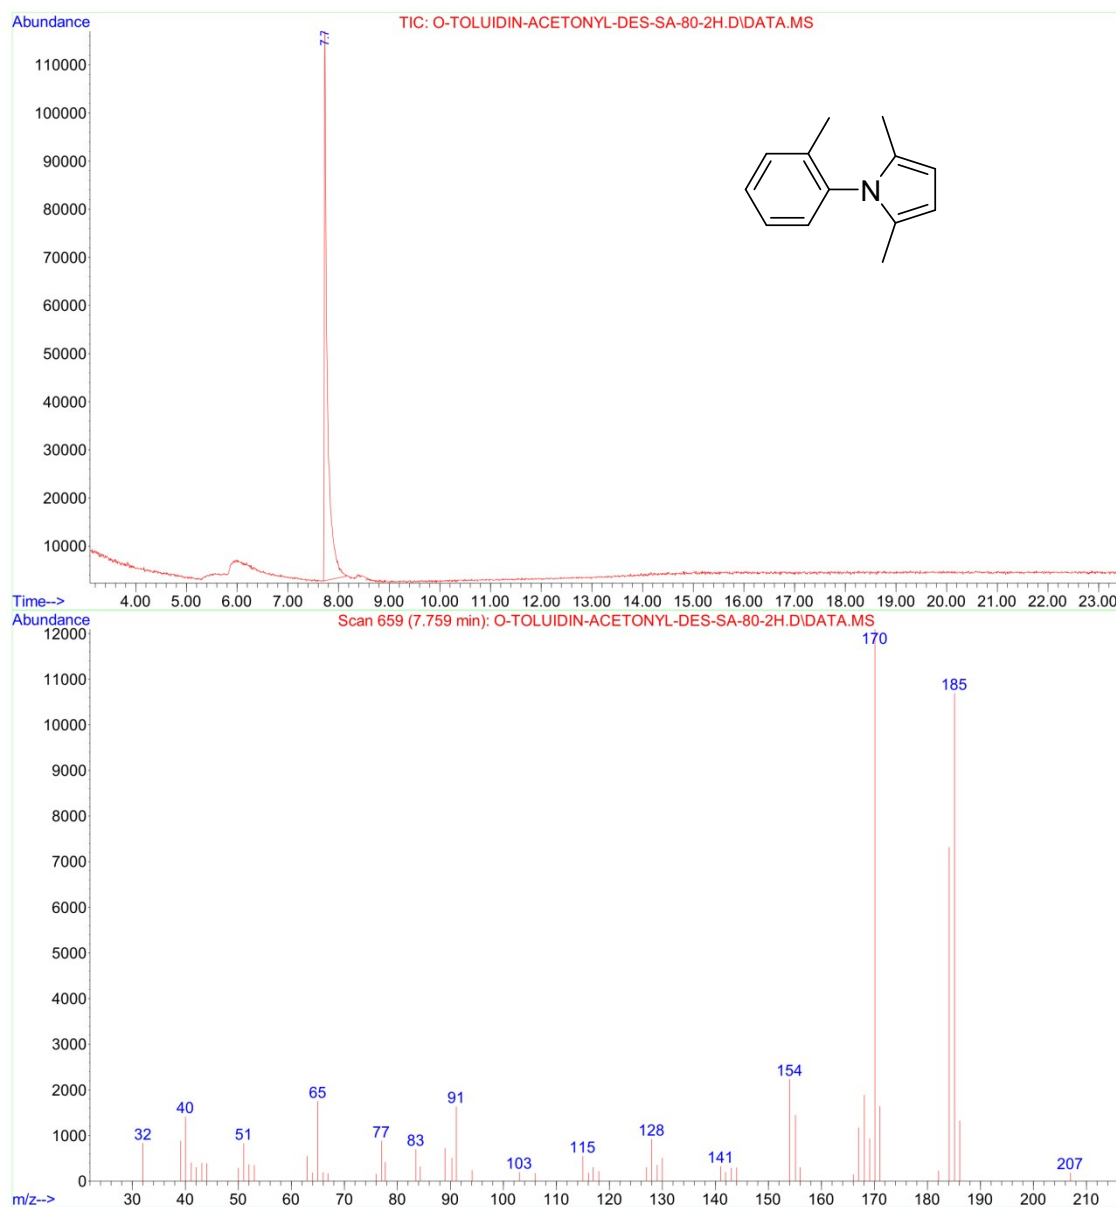

# $^1\text{H}$ NMR, $^{13}\text{C}$ NMR, and GC-MS of 1-(4-Hydroxyphenyl)-2,5-dimethyl-1H-pyrrole

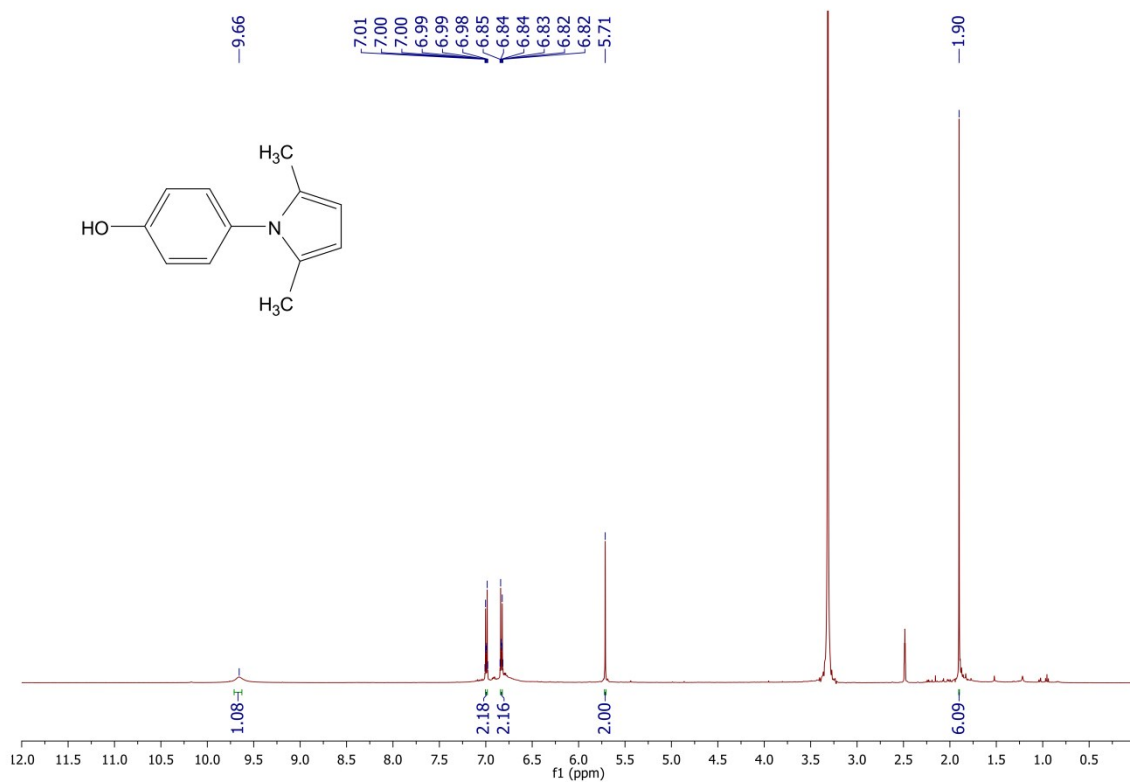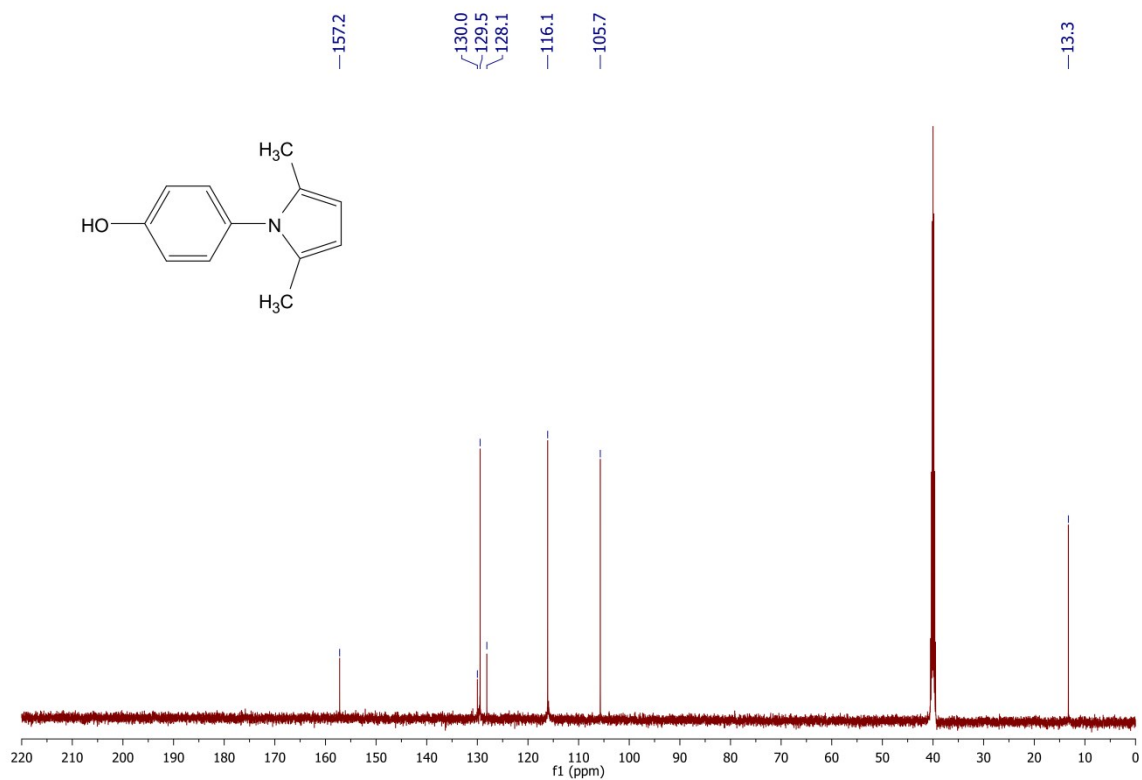

File :C:\GC-MS\2016\11.16.2016\4-AMINOPHENOL-0-4.D  
Operator : TRUONG HAI  
Acquired : 16 Nov 2016 16:21 using AcqMethod ACYLATION-SHORT-DELAY-3MIN.M  
Instrument : GCMSD  
Sample Name: 4-AMINOPHENOL-0-4  
Misc Info :  
Vial Number: 2

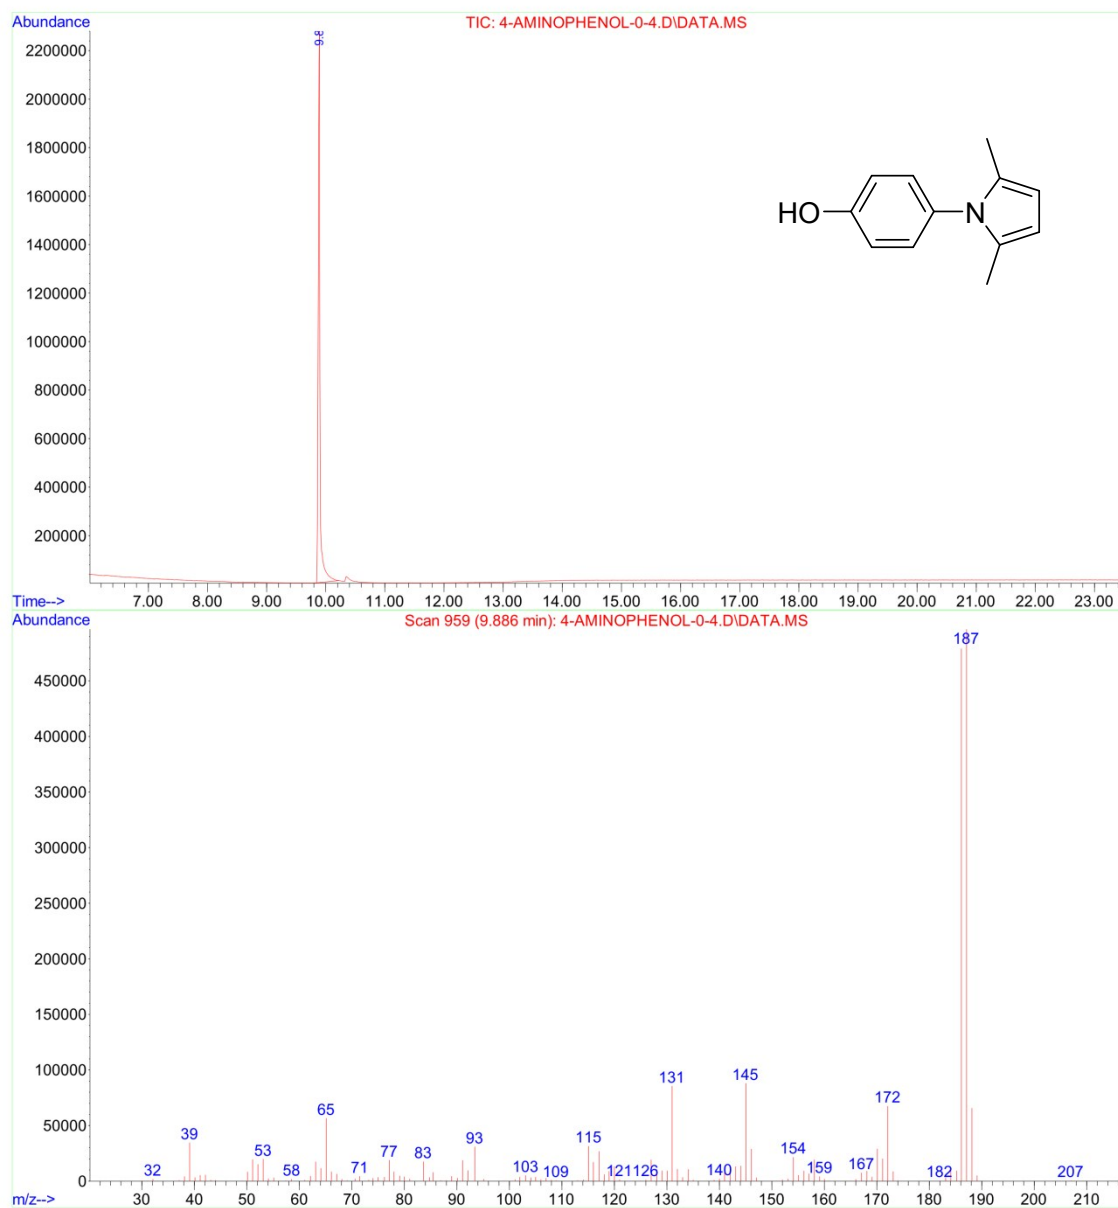

**<sup>1</sup>H NMR, <sup>13</sup>C NMR, and HRMS of 1-(2'-Hydroxy-5'-methylphenyl)-2,5-dimethyl-1H-pyrrole**

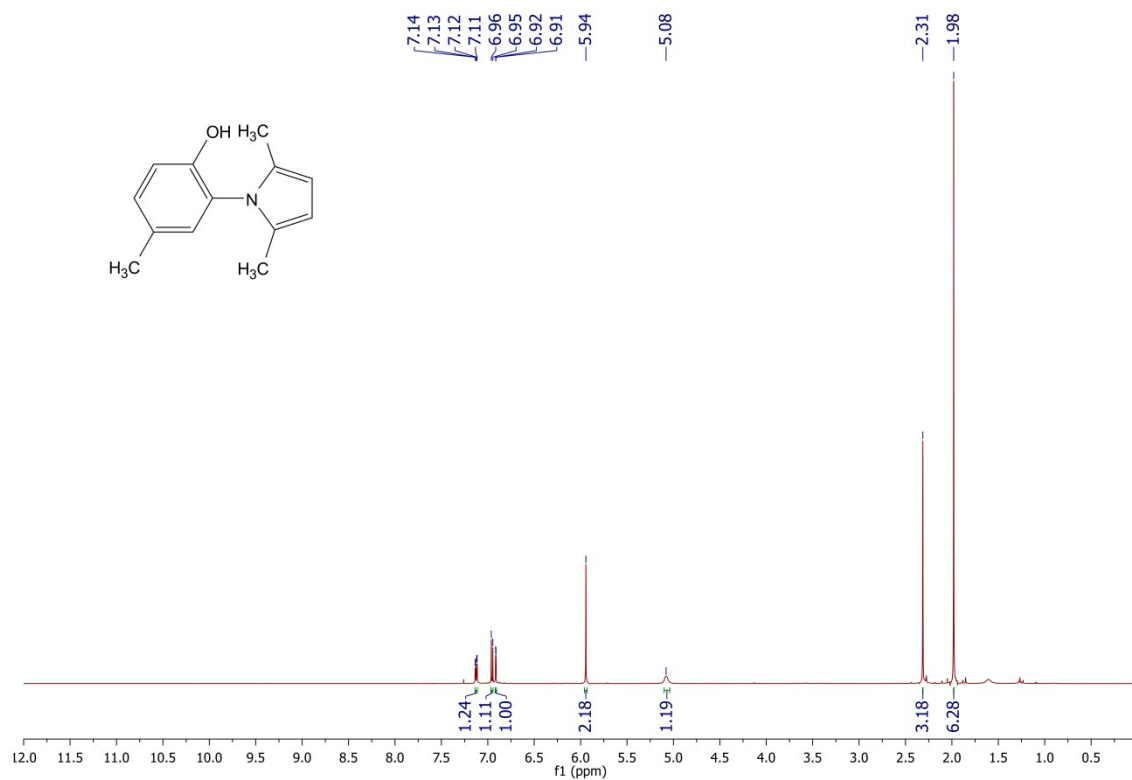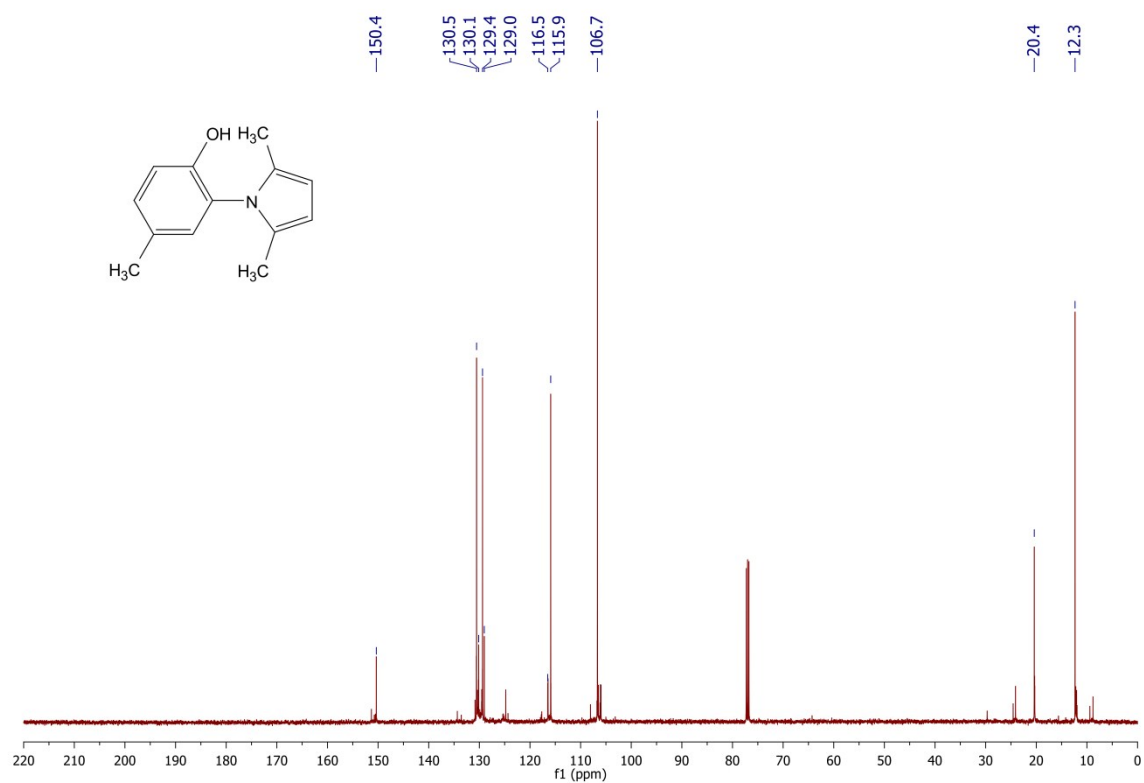



## Display Report

### Analysis Info

Analysis Name D:\Data\2016\2 ami\_1-b,1\_01\_2267.d  
Method dmm 2017.m  
Sample Name 2 ami  
Comment

Acquisition Date 12/30/2016 3:54:34 PM

Operator Anh Mai  
Instrument micrOTOF-Q 10187

### Acquisition Parameter

|             |          |                       |           |                  |           |
|-------------|----------|-----------------------|-----------|------------------|-----------|
| Source Type | ESI      | Ion Polarity          | Positive  | Set Nebulizer    | 1.2 Bar   |
| Focus       | Active   | Set Capillary         | 4000 V    | Set Dry Heater   | 200 °C    |
| Scan Begin  | 100 m/z  | Set End Plate Offset  | -500 V    | Set Dry Gas      | 9.0 l/min |
| Scan End    | 1000 m/z | Set Collision Cell RF | 150.0 Vpp | Set Divert Valve | Source    |

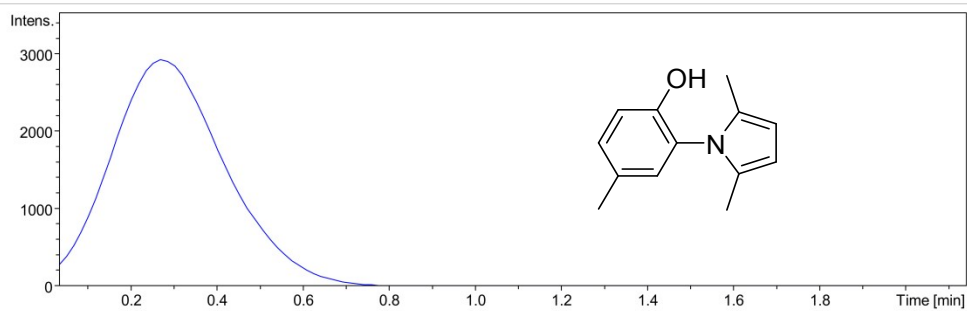

— EIC 202.0000 +All MS, -Spectral Bkgnd, Smoothed (4.02,2,GA)

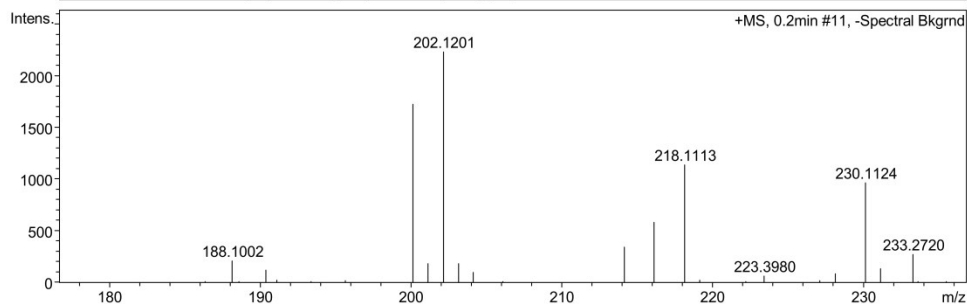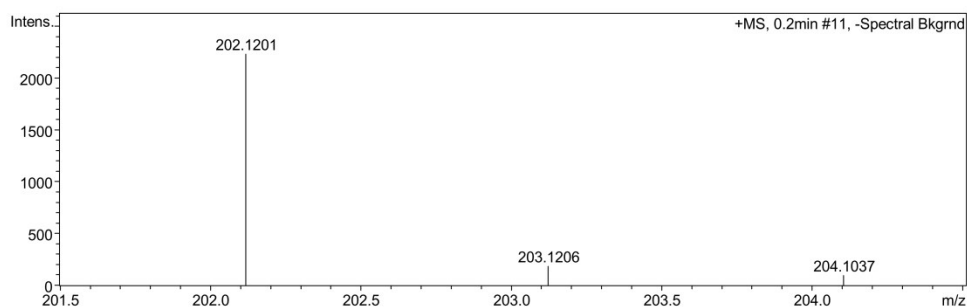

# $^1\text{H}$ NMR, $^{13}\text{C}$ NMR, and HR-MS of 1-(2'-Hydroxy-5'-nitrophenyl)-2,5-dimethyl-1*H*-pyrrole

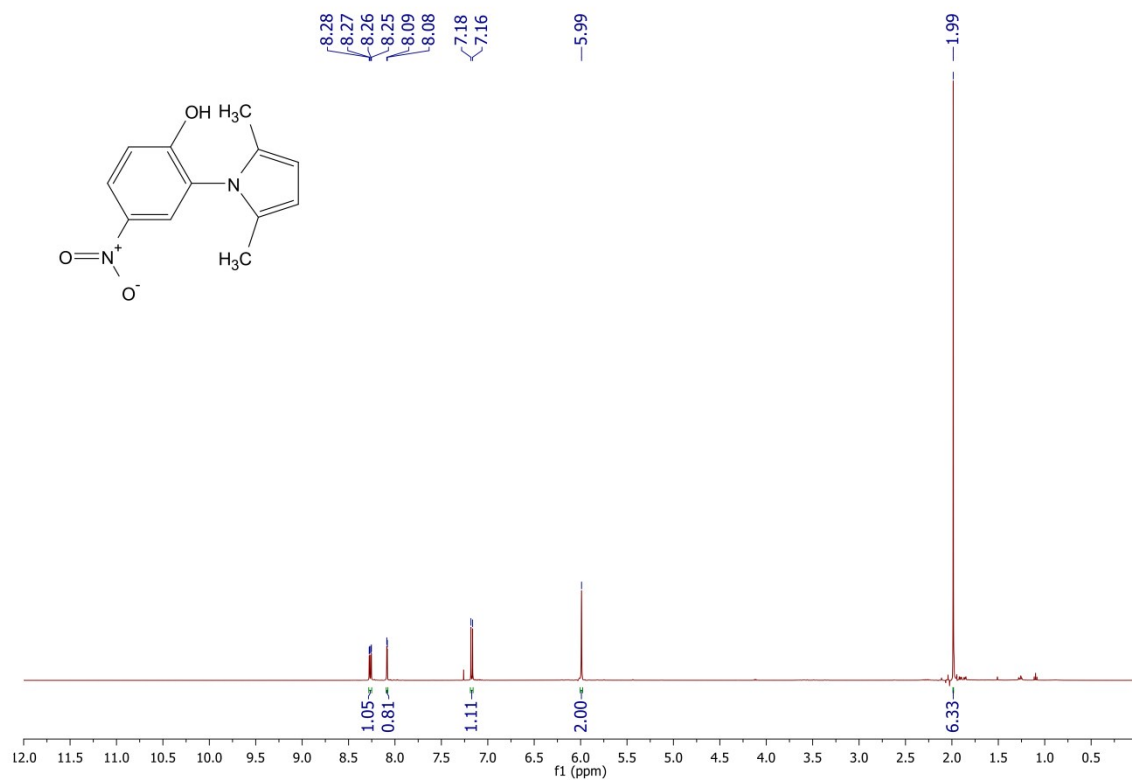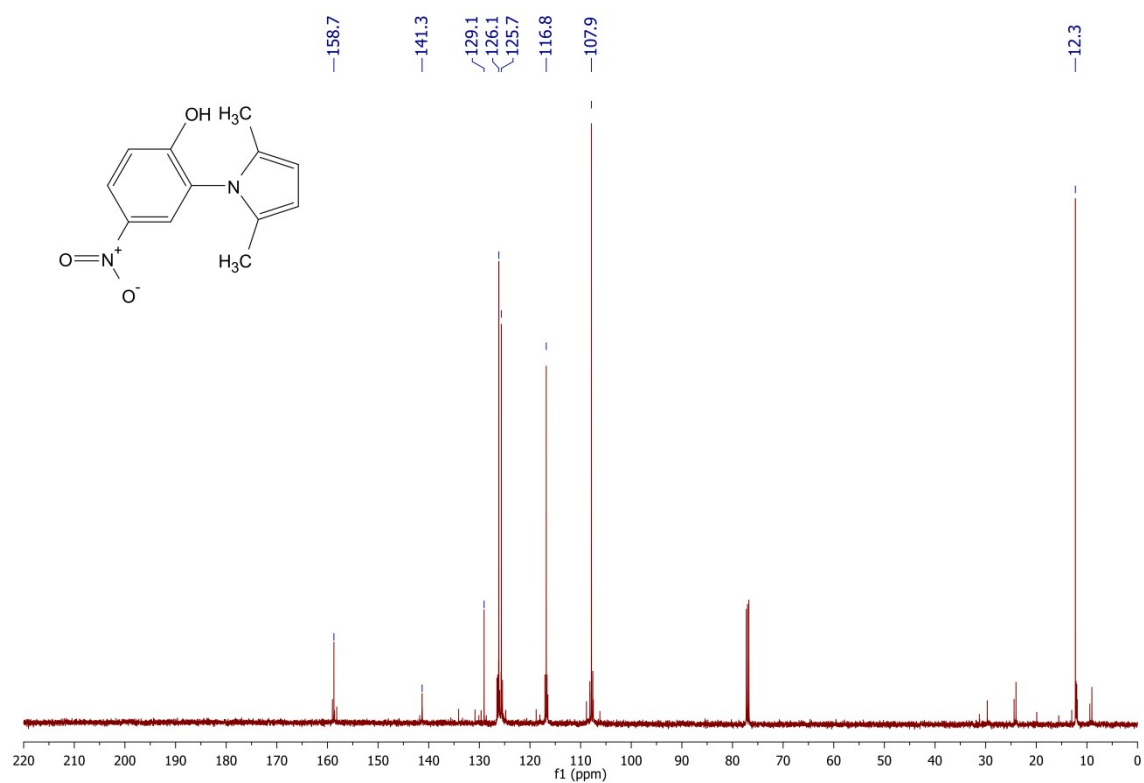

## Display Report

### Analysis Info

Analysis Name D:\Data\2016\2 amino 4 ntro\_1-b,3\_01\_2264.d  
Method dmm 2017.m  
Sample Name 2 amino 4 ntro  
Comment

Acquisition Date 12/29/2016 6:23:13 PM

Operator Anh Mai  
Instrument micrOTOF-Q 10187

### Acquisition Parameter

|             |          |                       |           |                  |           |
|-------------|----------|-----------------------|-----------|------------------|-----------|
| Source Type | ESI      | Ion Polarity          | Positive  | Set Nebulizer    | 1.2 Bar   |
| Focus       | Active   | Set Capillary         | 4000 V    | Set Dry Heater   | 200 °C    |
| Scan Begin  | 50 m/z   | Set End Plate Offset  | -500 V    | Set Dry Gas      | 9.0 l/min |
| Scan End    | 1000 m/z | Set Collision Cell RF | 450.0 Vpp | Set Divert Valve | Source    |

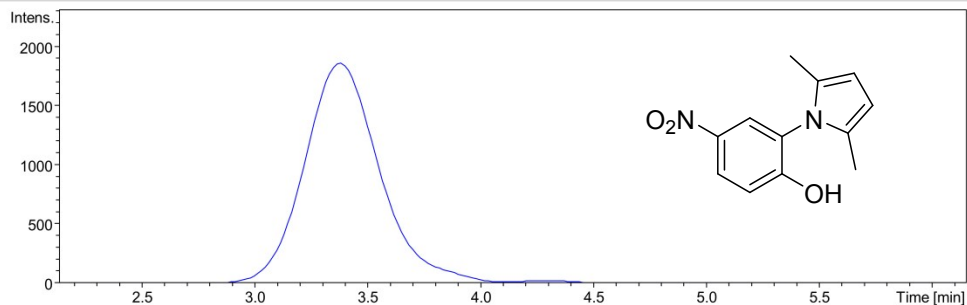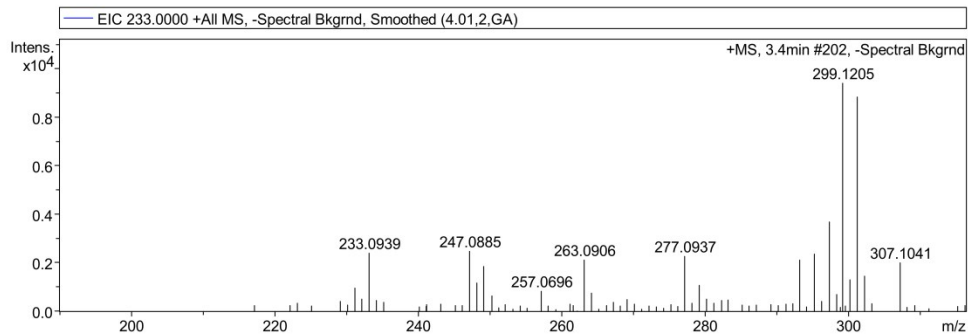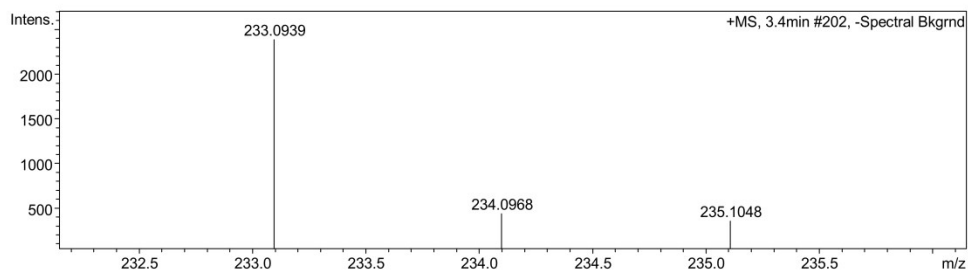

# $^1\text{H}$ NMR, $^{13}\text{C}$ NMR, and GC-MS of 1-(2'-Amino-4'-nitrophenyl)-2,5-dimethyl-1H-pyrrole

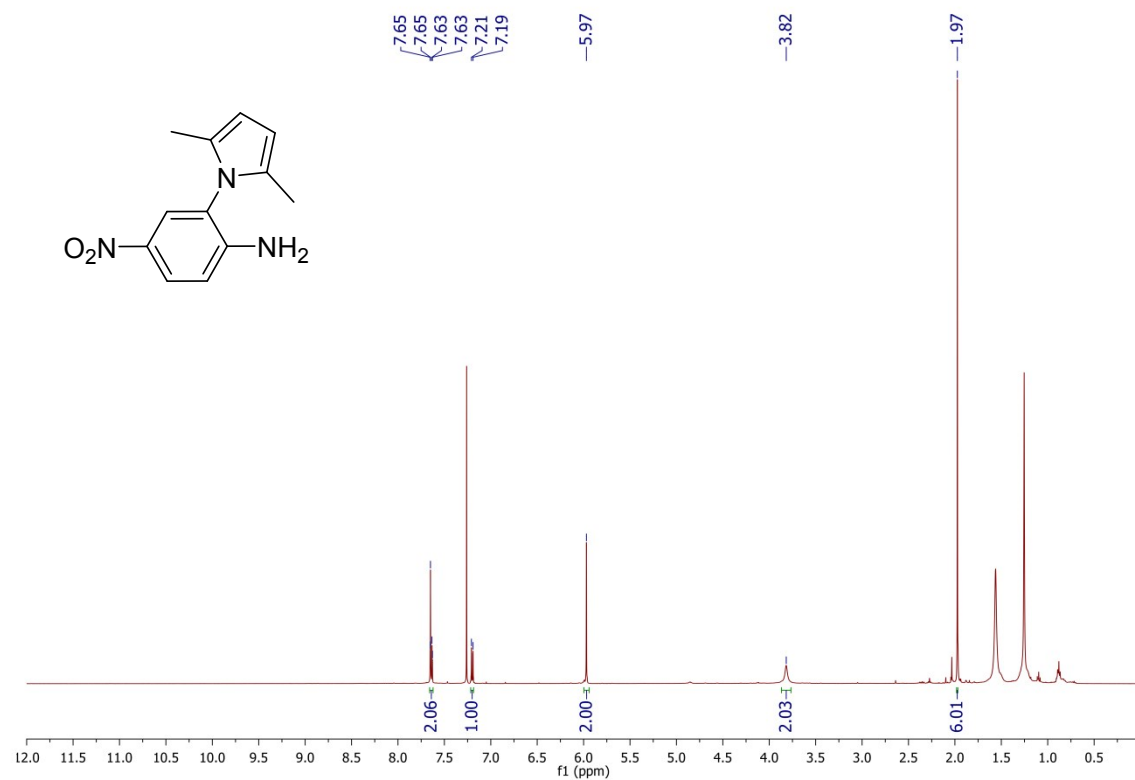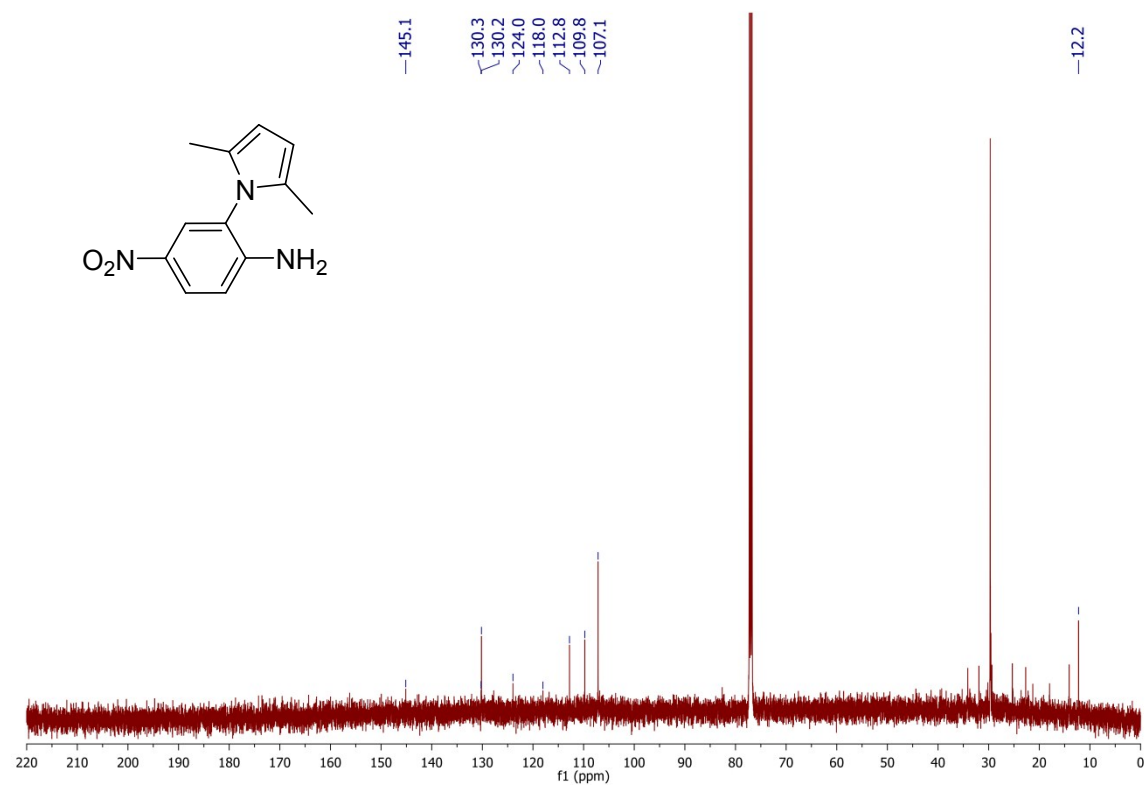

## Display Report

### Analysis Info

Analysis Name D:\Data\2016\4-ni\_1-b,2\_01\_2263.d  
Method dmm 2017.m  
Sample Name 4-ni  
Comment

Acquisition Date 12/29/2016 6:12:14 PM

Operator Anh Mai  
Instrument micrOTOF-Q 10187

### Acquisition Parameter

|             |          |                       |           |                  |           |
|-------------|----------|-----------------------|-----------|------------------|-----------|
| Source Type | ESI      | Ion Polarity          | Positive  | Set Nebulizer    | 1.2 Bar   |
| Focus       | Active   | Set Capillary         | 4000 V    | Set Dry Heater   | 200 °C    |
| Scan Begin  | 50 m/z   | Set End Plate Offset  | -500 V    | Set Dry Gas      | 9.0 l/min |
| Scan End    | 1000 m/z | Set Collision Cell RF | 450.0 Vpp | Set Divert Valve | Source    |

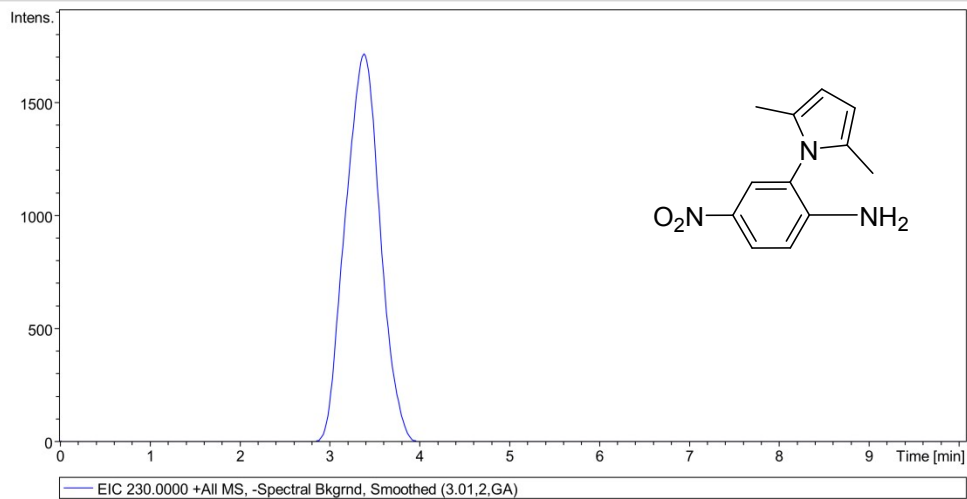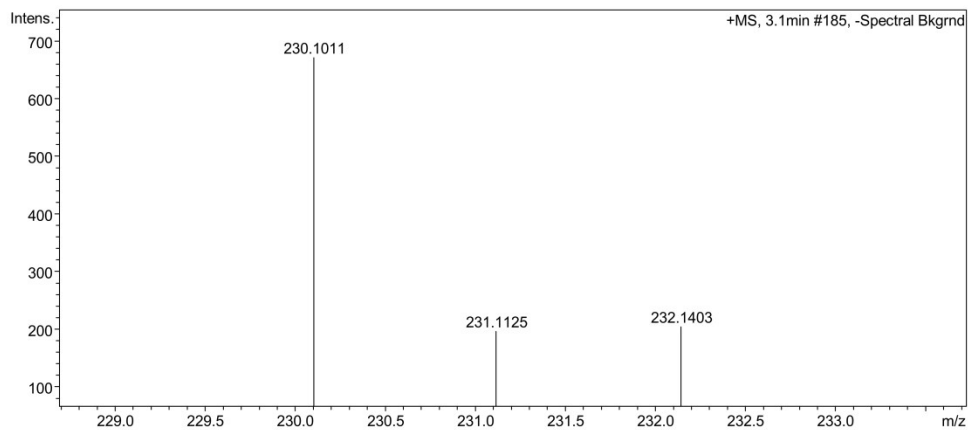

# $^1\text{H}$ NMR, $^{13}\text{C}$ NMR, and GC-MS of 1-(3,5-Dichlorophenyl)-2,5-dimethyl-1H-pyrrole

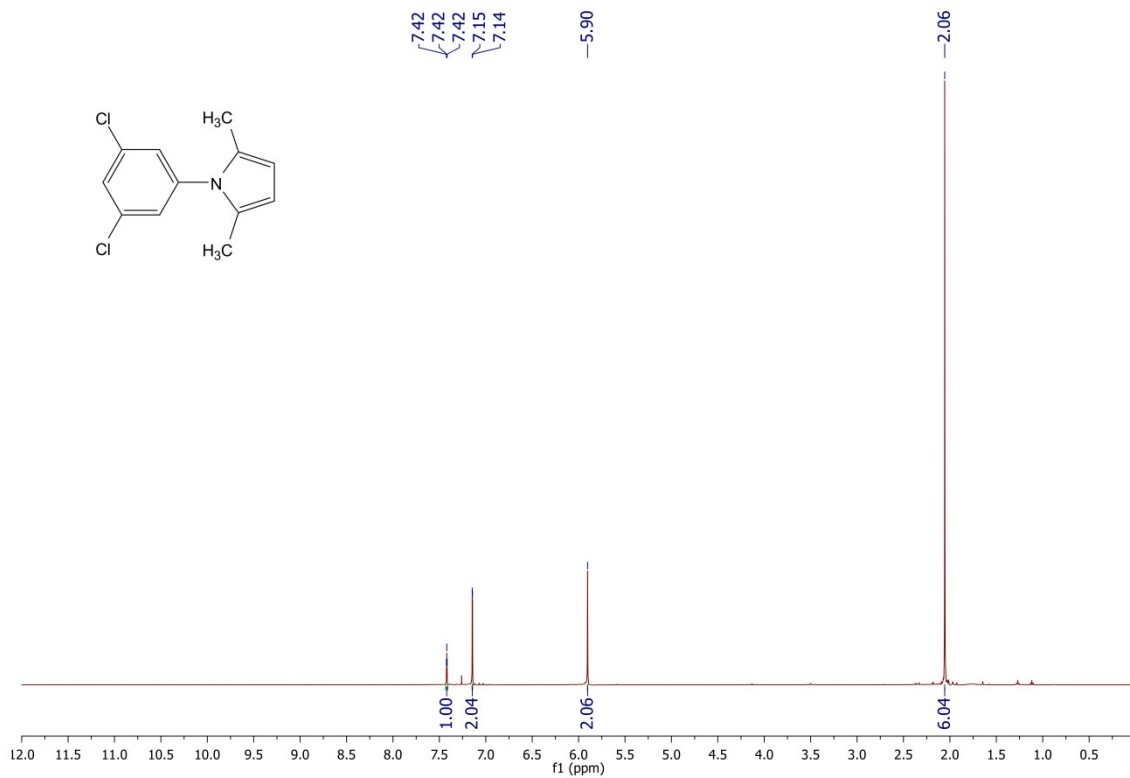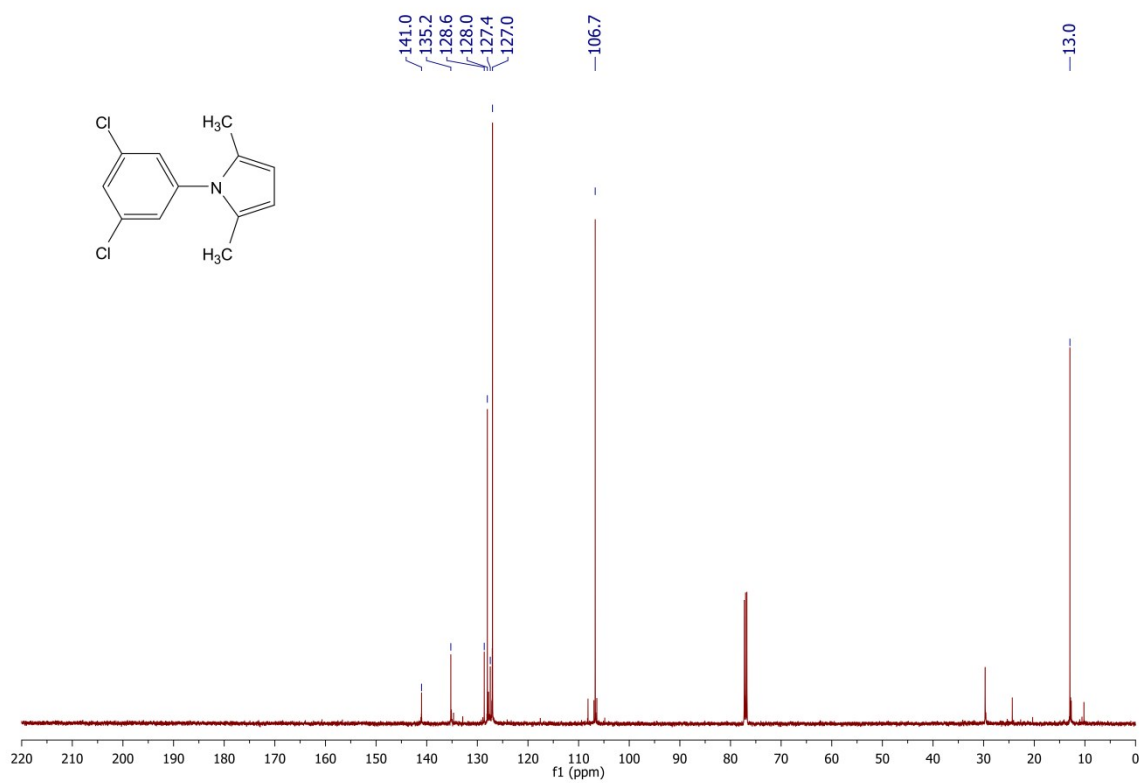

File : C:\GC-MS\2016\08.03.2016\35-DICHLOROANILIN-ACETONYLACETON-DE  
... S-SA-80-2H.D  
Operator : TRUONG HAI  
Instrument : GCMSD  
Acquired : 3 Aug 2016 18:03 using AcqMethod ACYLATION-SHORT-DELAY-3MIN.M  
Sample Name: 35-DICHLOROANILIN-ACETONYLACETON-DES-SA-80-2H  
Misc Info :

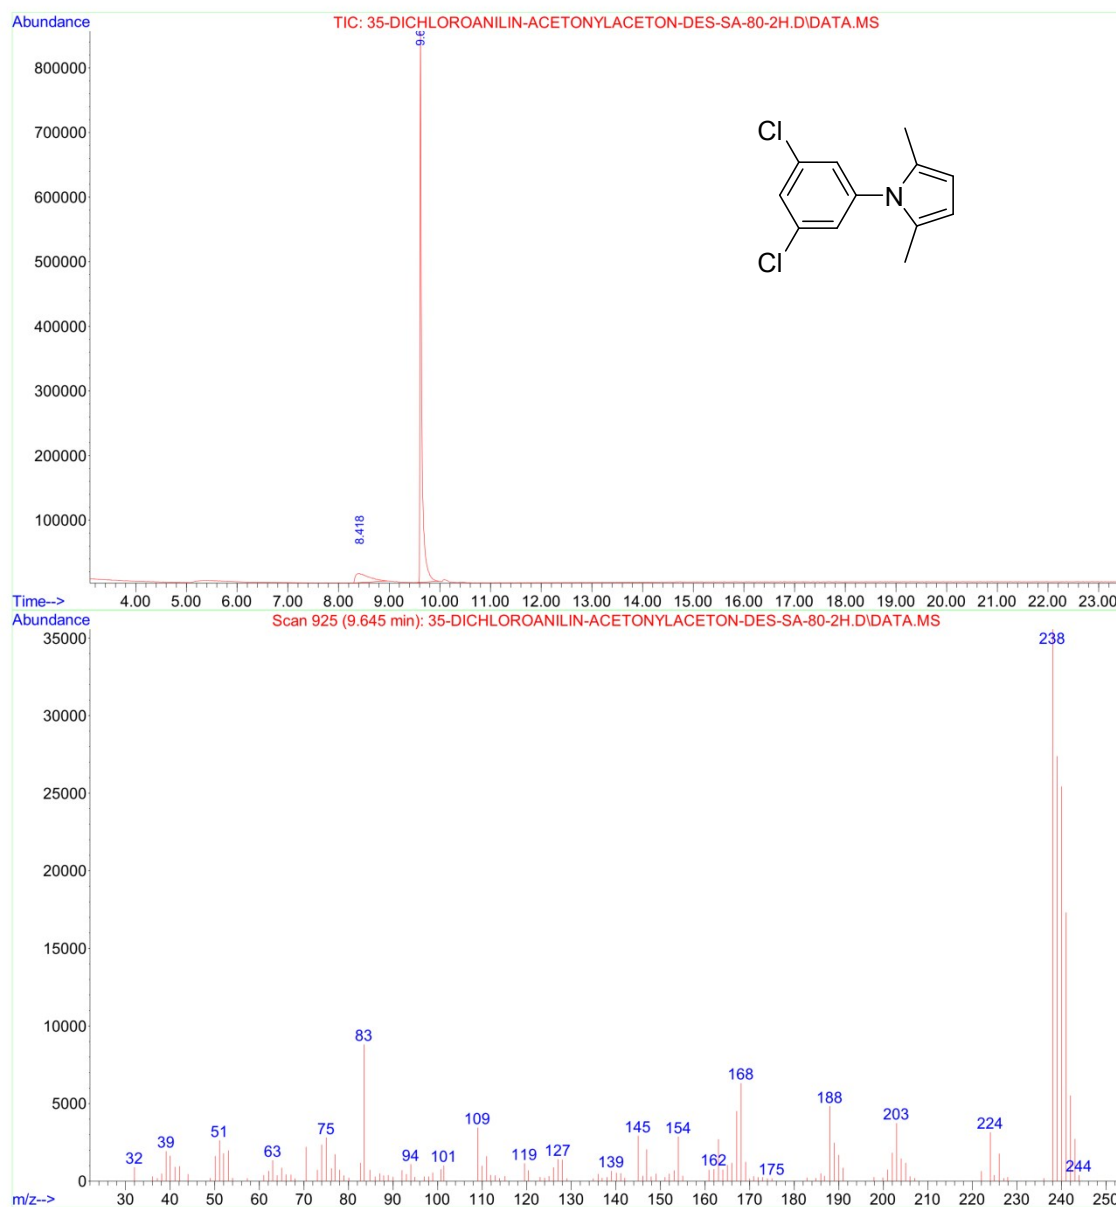

# <sup>1</sup>H NMR, <sup>13</sup>C NMR, and GC-MS of 1-(2,5-Dichlorophenyl)-2,5-dimethyl-1H-pyrrole

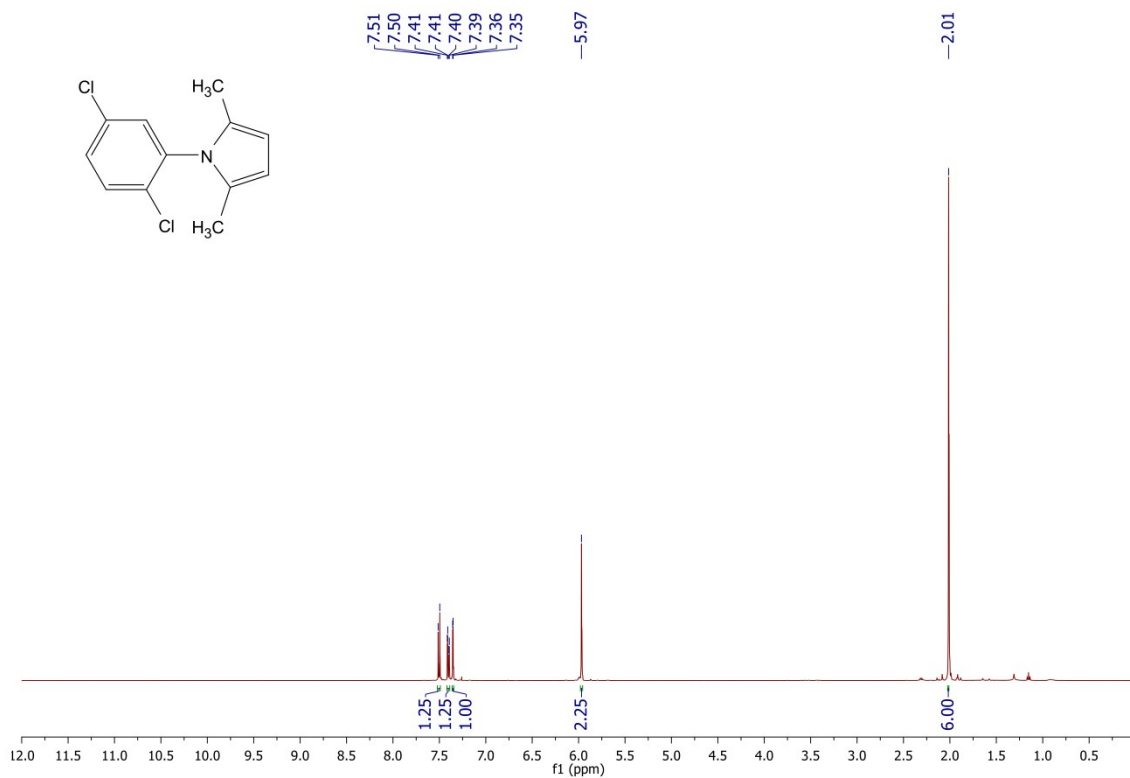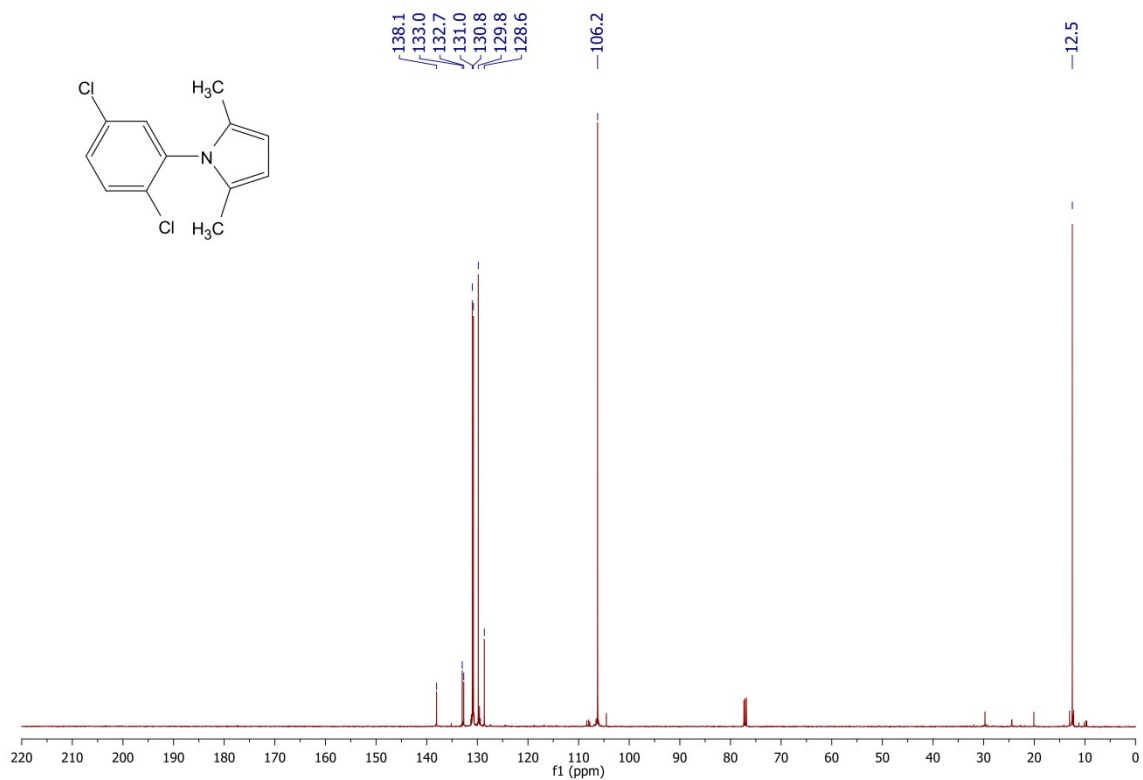



File :C:\GC-MS\2016\08.03.2016\25-DICHLOROANILIN-ACETONY-DES-SA-80  
... -2H.D  
Operator : TRUONG HAI  
Instrument : GCMSD  
Acquired : 8 Aug 2016 16:19 using AcqMethod ACYLATION-SHORT-DELAY-3MIN.M  
Sample Name: 25-DICHLOROANILIN-ACETONY-DES-SA-80-2H  
Misc Info :

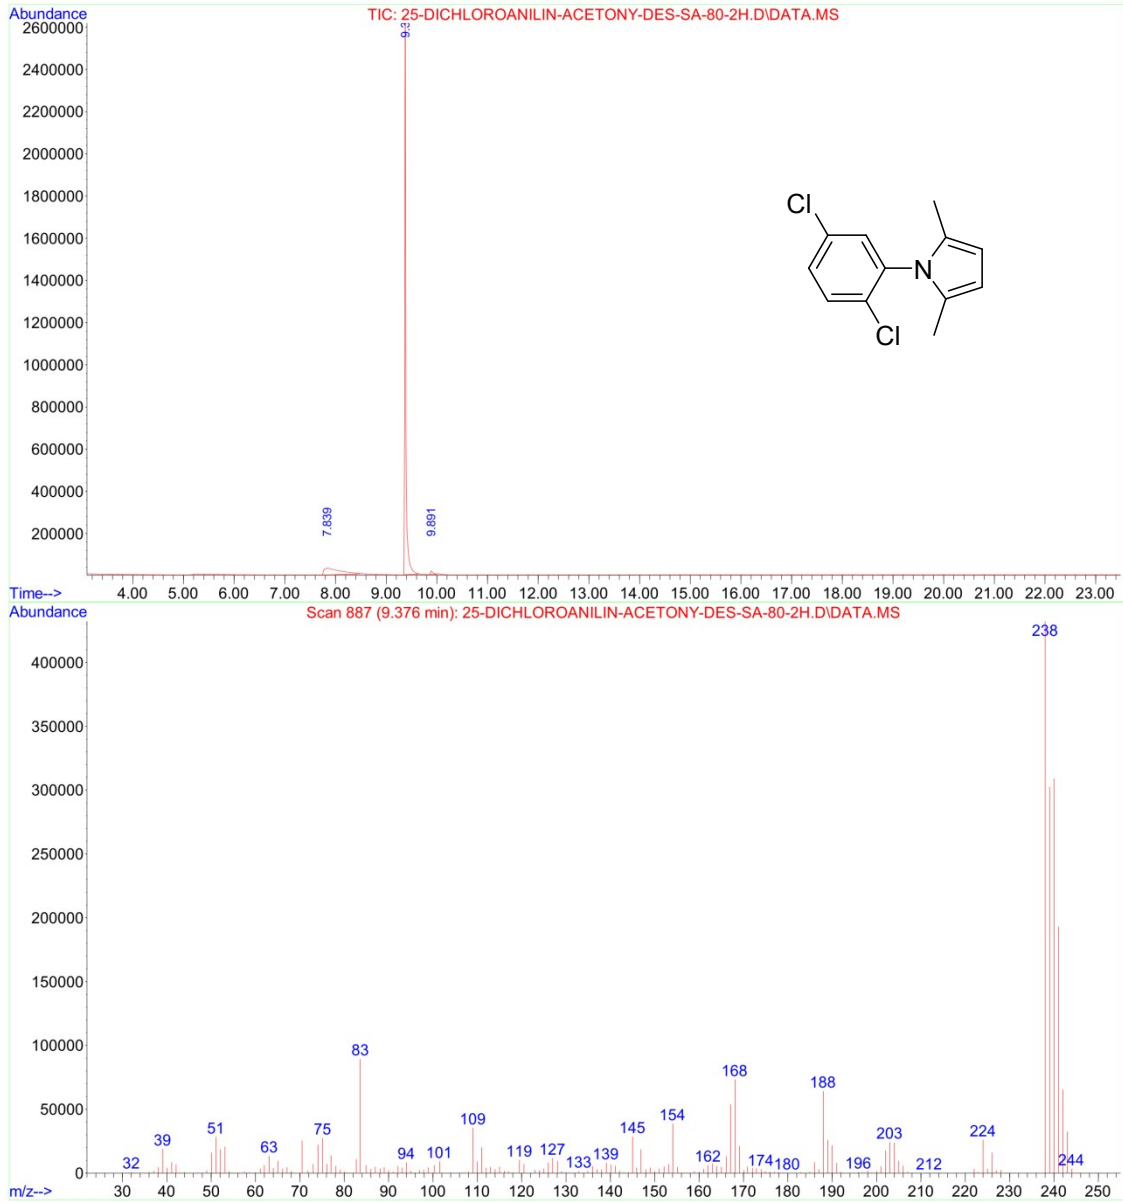

# $^1\text{H}$ NMR, $^{13}\text{C}$ NMR, and GC-MS of 1-(3,4-Dichlorophenyl)-2,5-dimethyl-1H-pyrrole

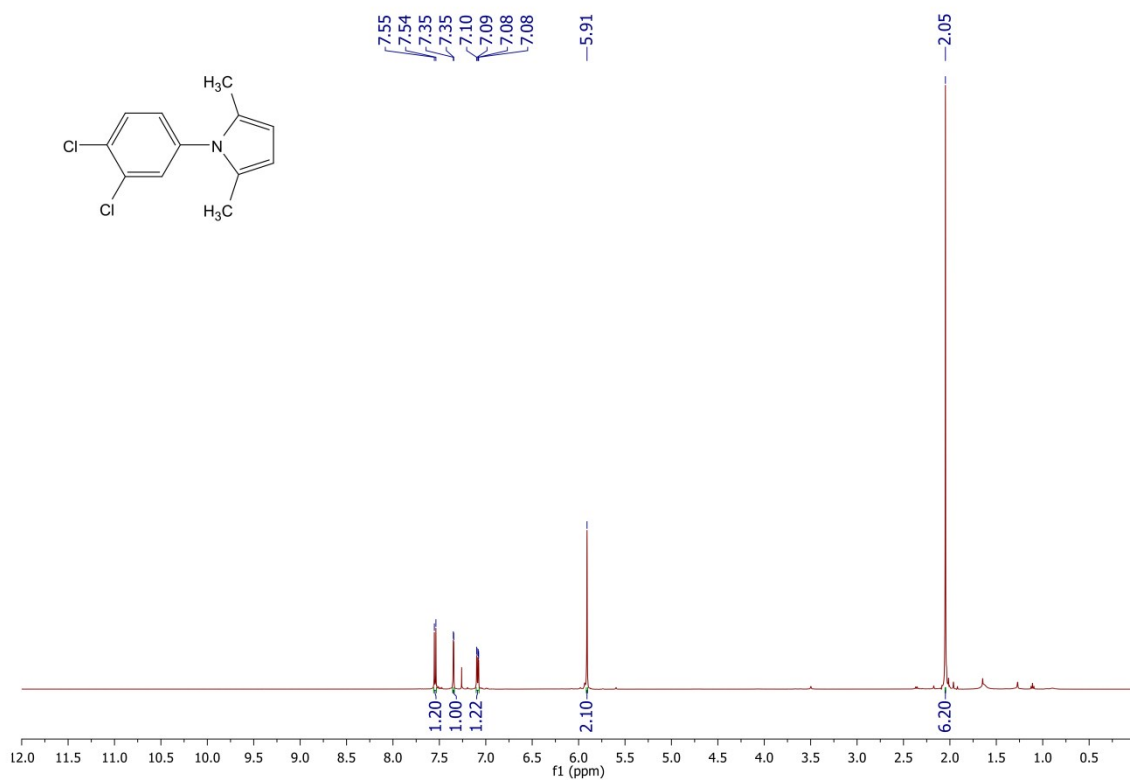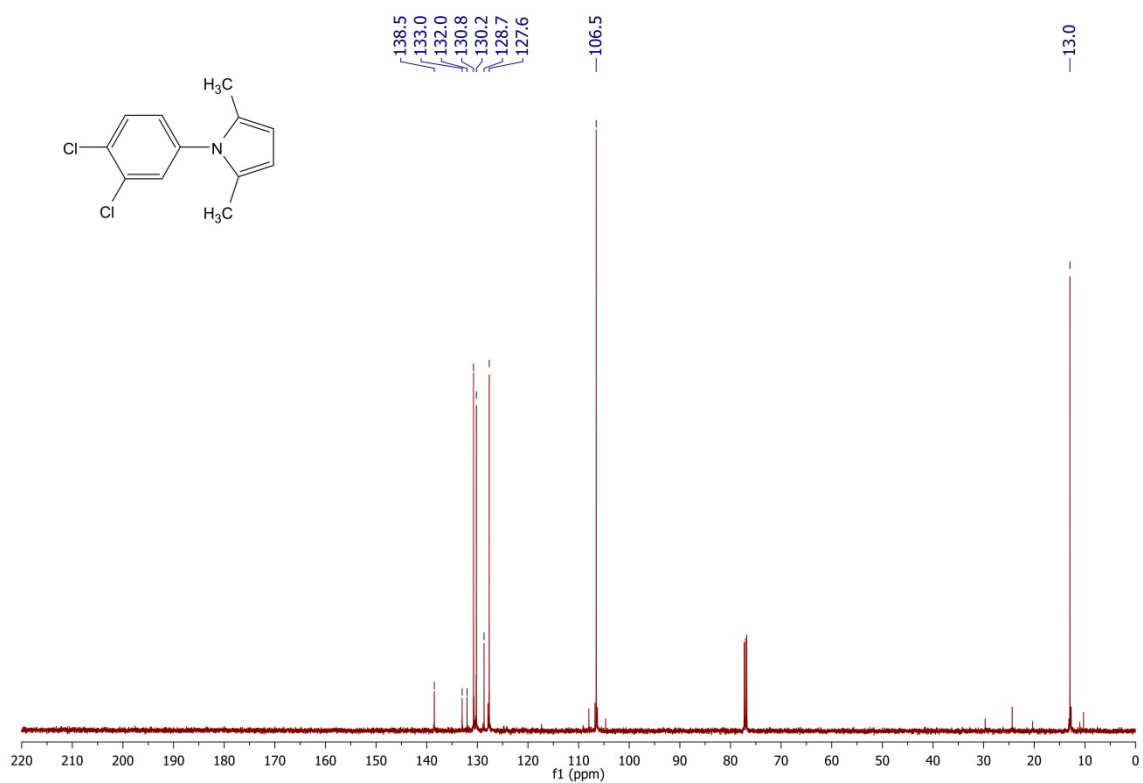

File :C:\GC-MS\2016\08.03.2016\34-DICHLOROANILIN-ACETONY-DES-SA-80  
... -2H.D  
Operator : TRUONG HAI  
Instrument : GCMSD  
Acquired : 8 Aug 2016 16:54 using AcqMethod ACYLATION-SHORT-DELAY-3MIN.M  
Sample Name: 34-DICHLOROANILIN-ACETONY-DES-SA-80-2H  
Misc Info :

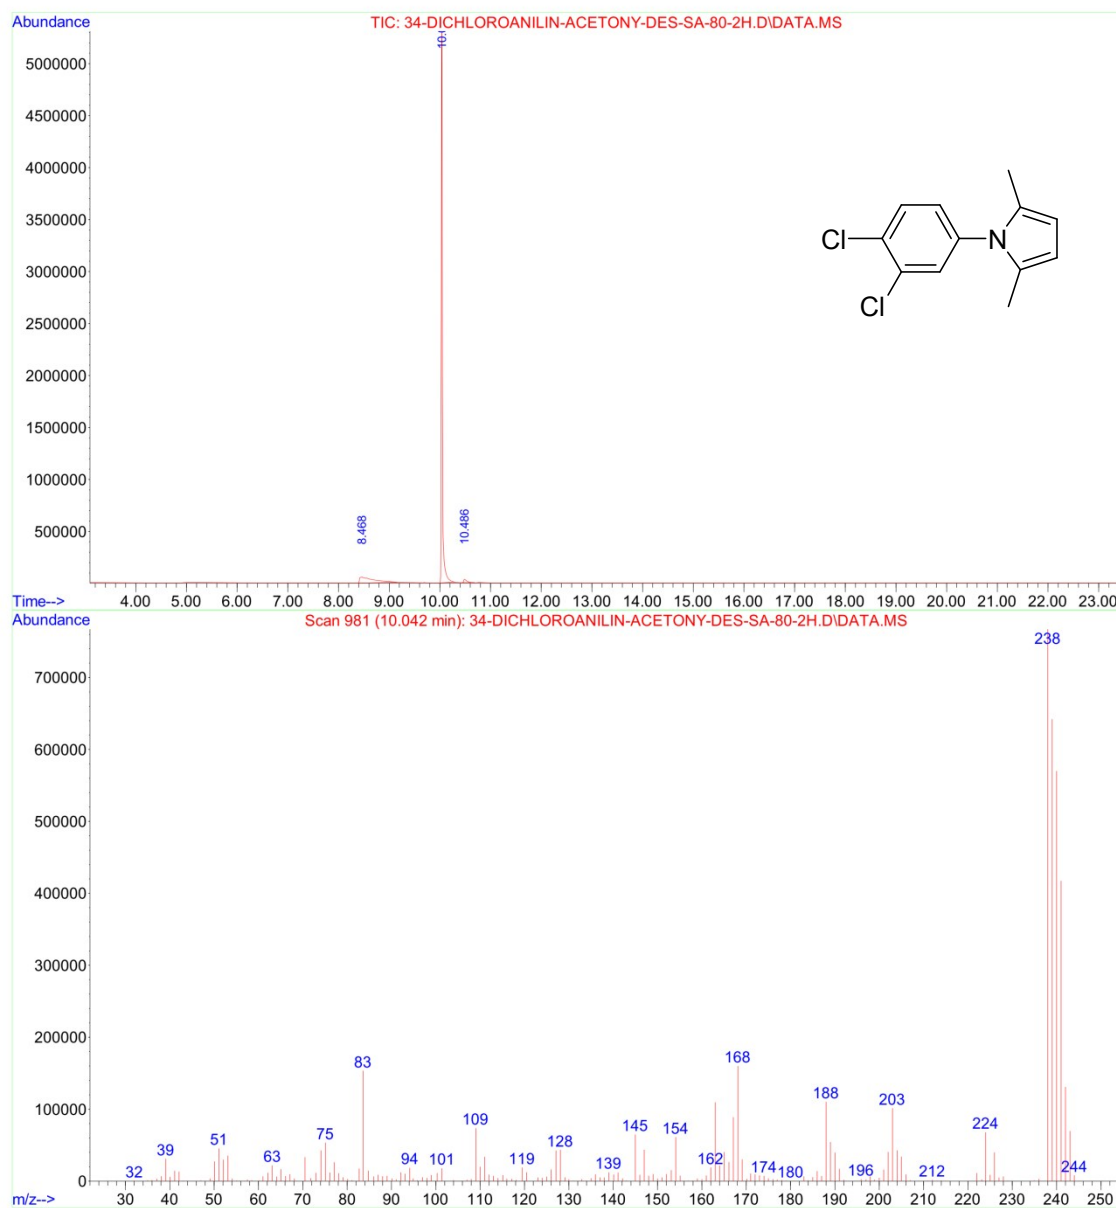

# $^1\text{H}$ NMR, $^{13}\text{C}$ NMR, and GC-MS of 1-(2,5-Dibromophenyl)-2,5-dimethyl-1H-pyrrole

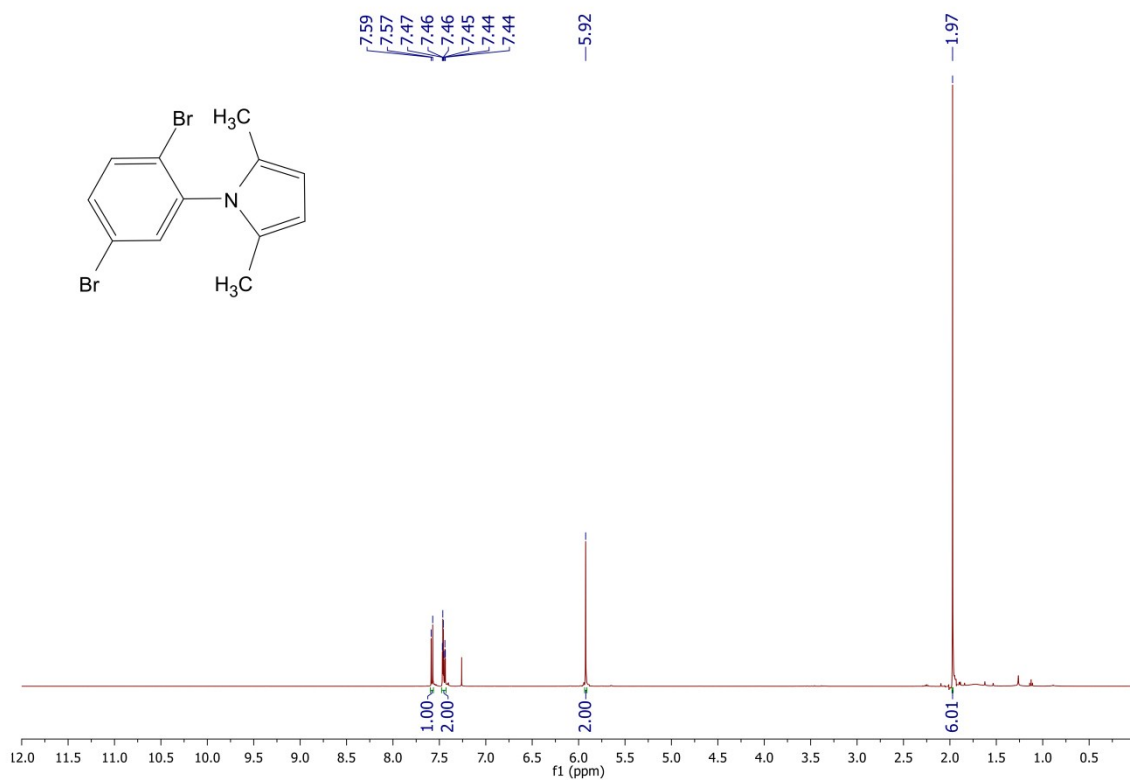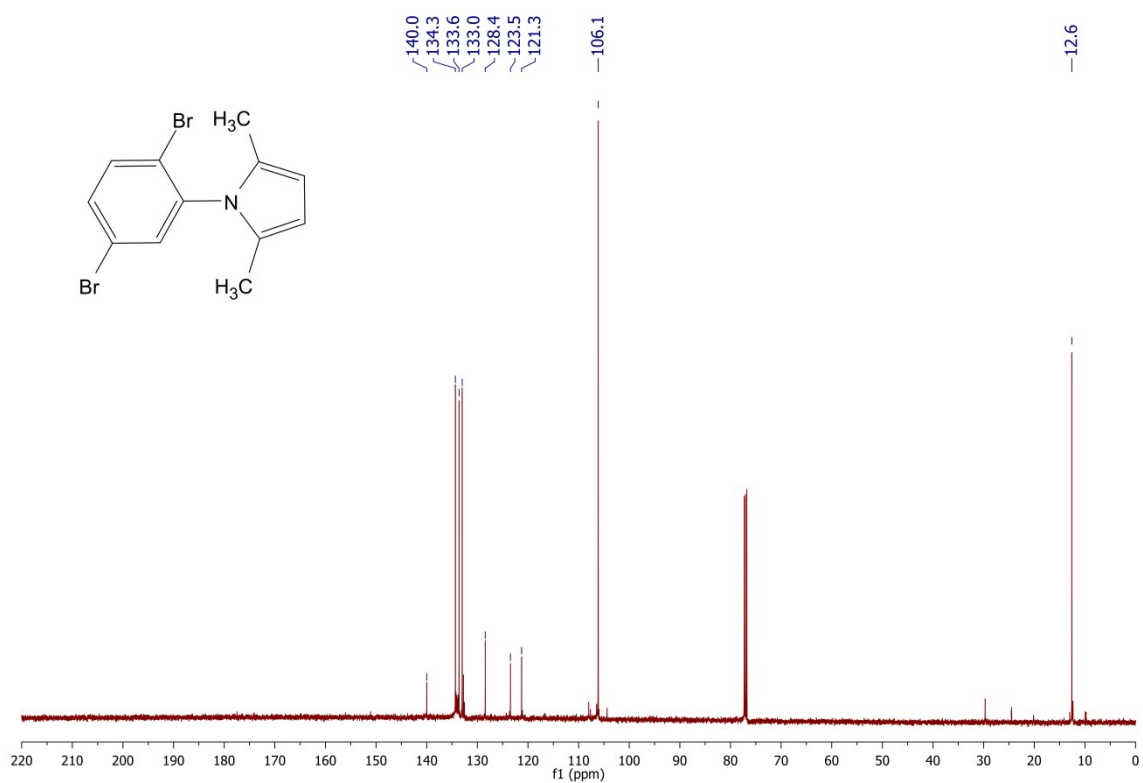

File : C:\GC-MS\2016\08.17.2016\25-DIBROMOANILIN-ACETONYL-DES-SA-80  
... C-2H.D  
Operator : TRUONG HAI  
Instrument : GCMSD  
Acquired : 17 Aug 2016 13:03 using AcqMethod ACYLATION-SHORT-DELAY-3MIN.M  
Sample Name: 25-DIBROMOANILIN-ACETONYL-DES-SA-80C-2H  
Misc Info :

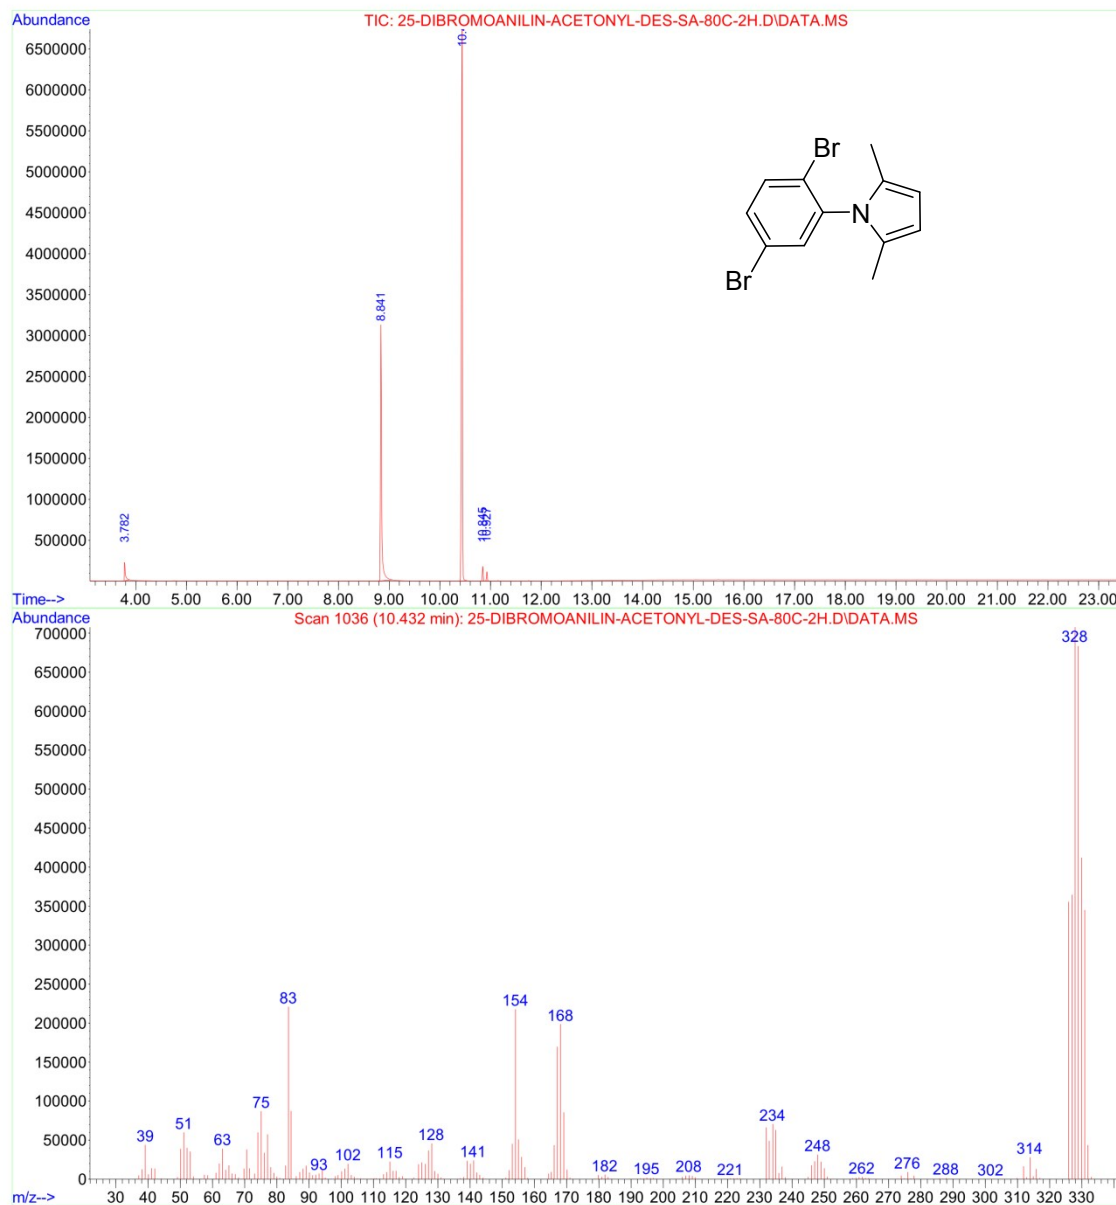

# $^1\text{H}$ NMR, $^{13}\text{C}$ NMR, and GC-MS of 1-(4-Iodophenyl)-2,5-dimethyl-1H-pyrrole

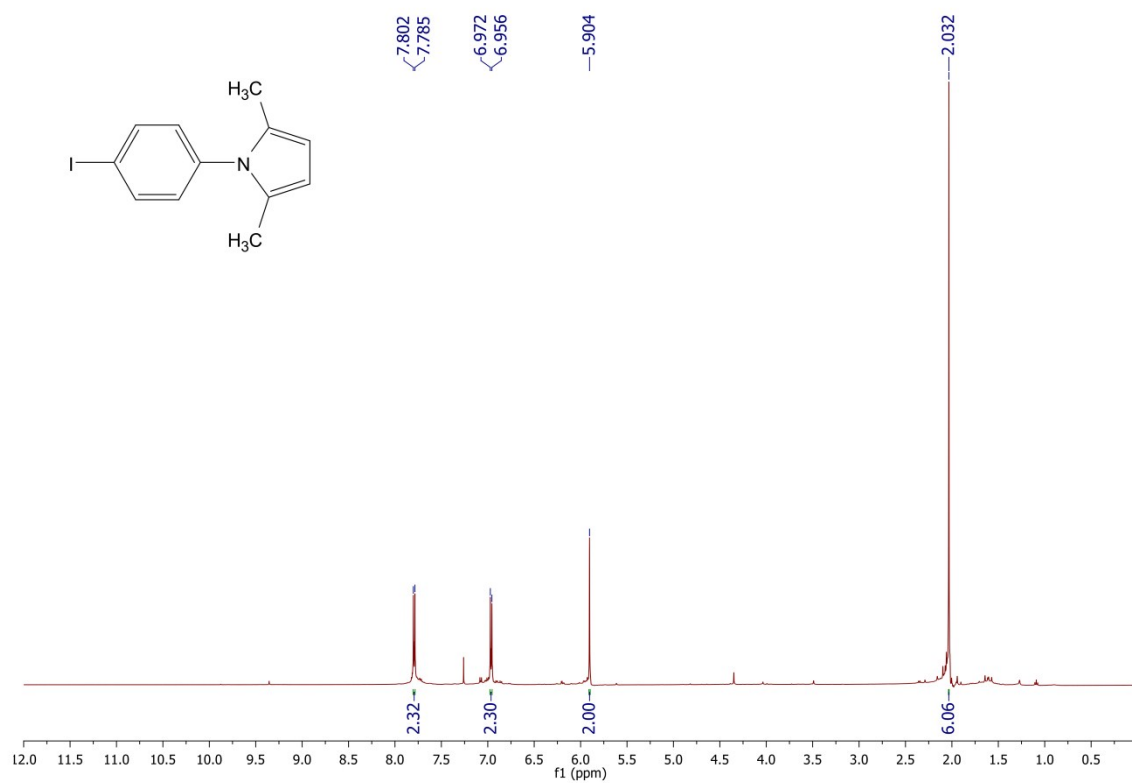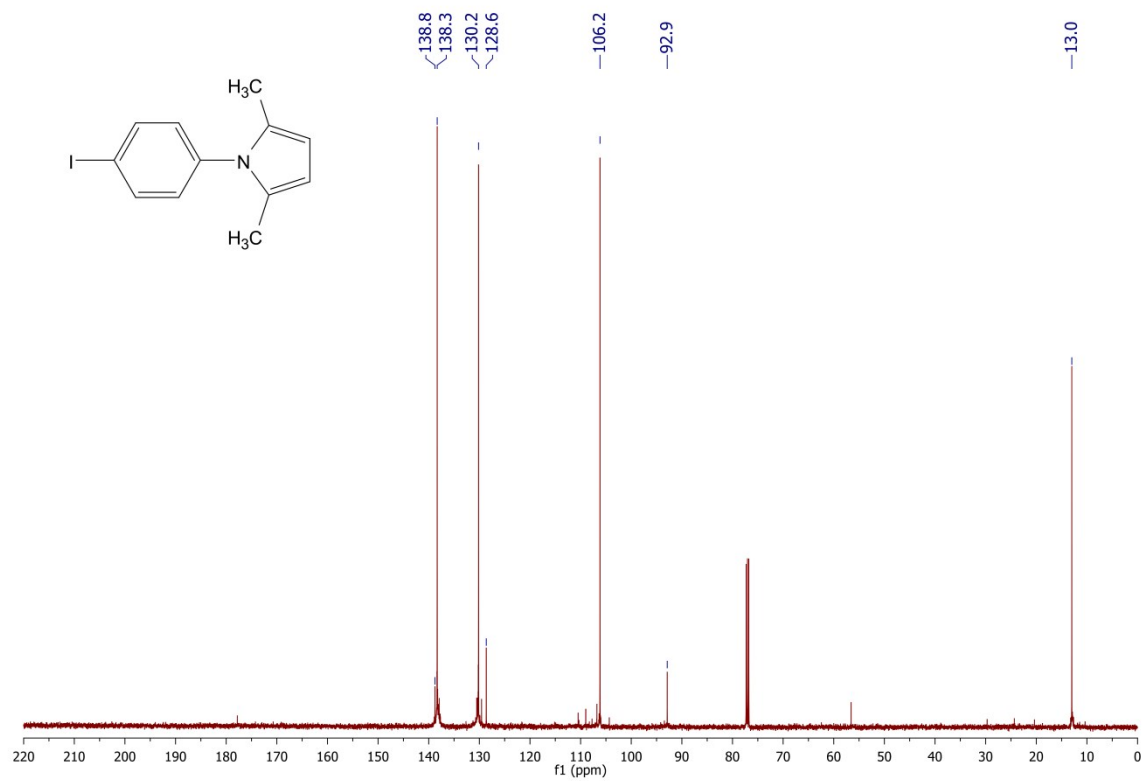

File : C:\GC-MS\2016\11.29.2016\4-IODOANILINE-AA-DES-SA-80-2H.D  
Operator : THAO TRAN  
Acquired : 29 Nov 2016 14:10 using AcqMethod ACYLATION-SHORT-DELAY-3MIN.M  
Instrument : GCMSD  
Sample Name: 4-IODOANILINE-AA-DES-SA-80-2H  
Misc Info :  
Vial Number: 2

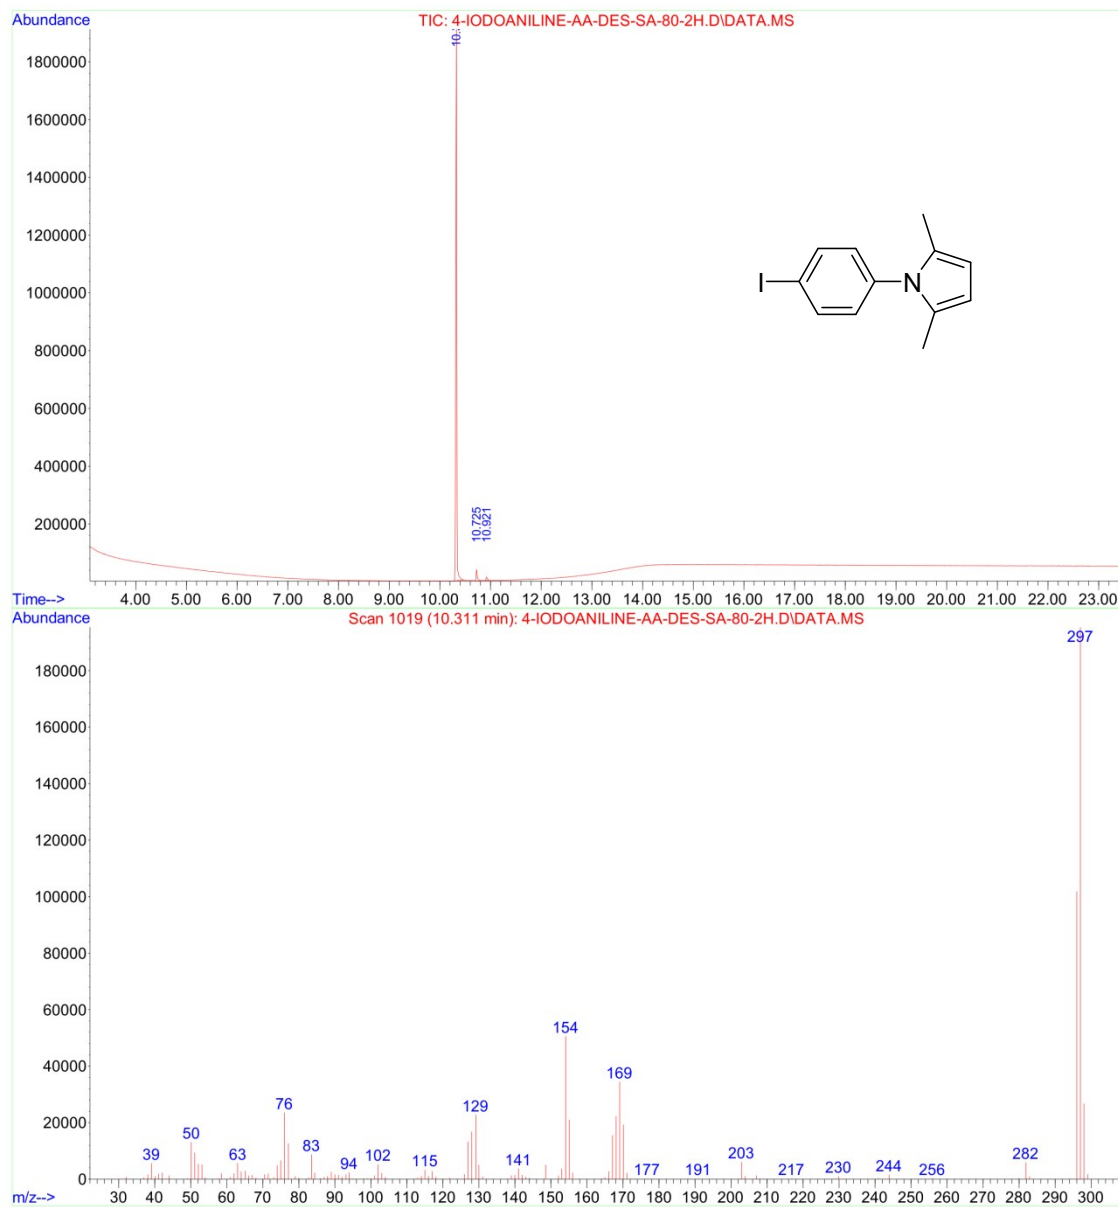

# <sup>1</sup>H NMR, <sup>13</sup>C NMR, and GC-MS of 1-([1,1'-Biphenyl]-2-yl)-2,5-dimethyl-1H-pyrrole

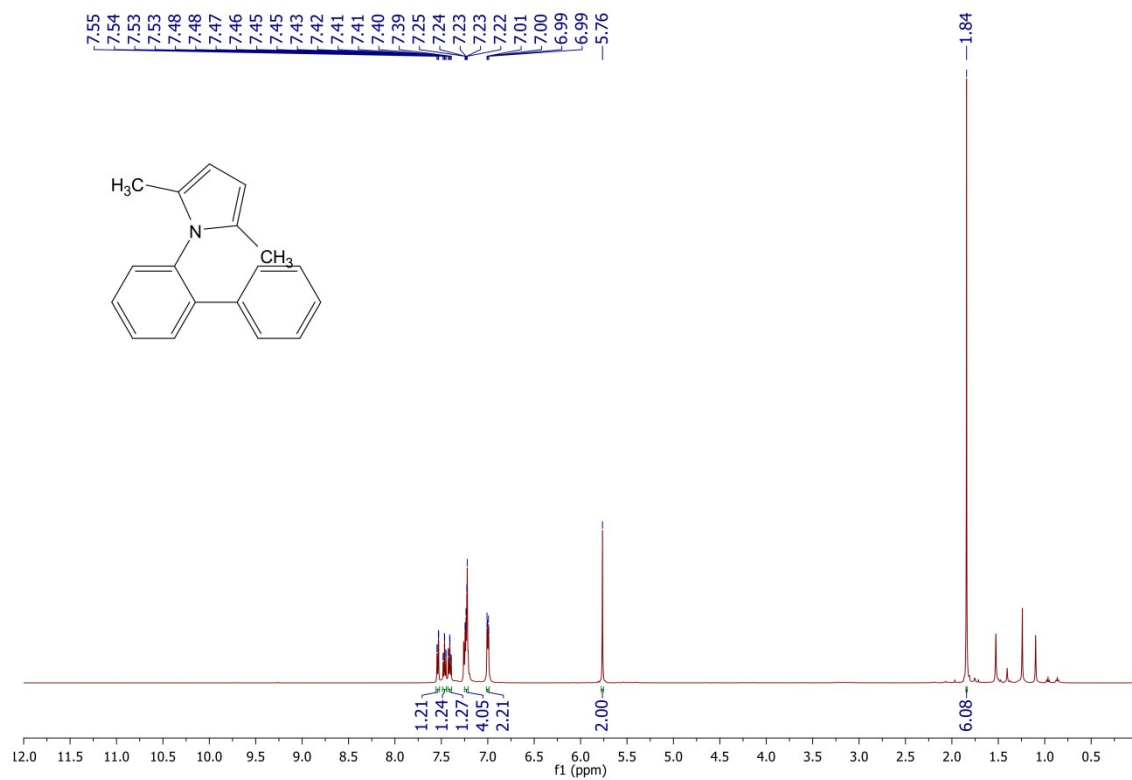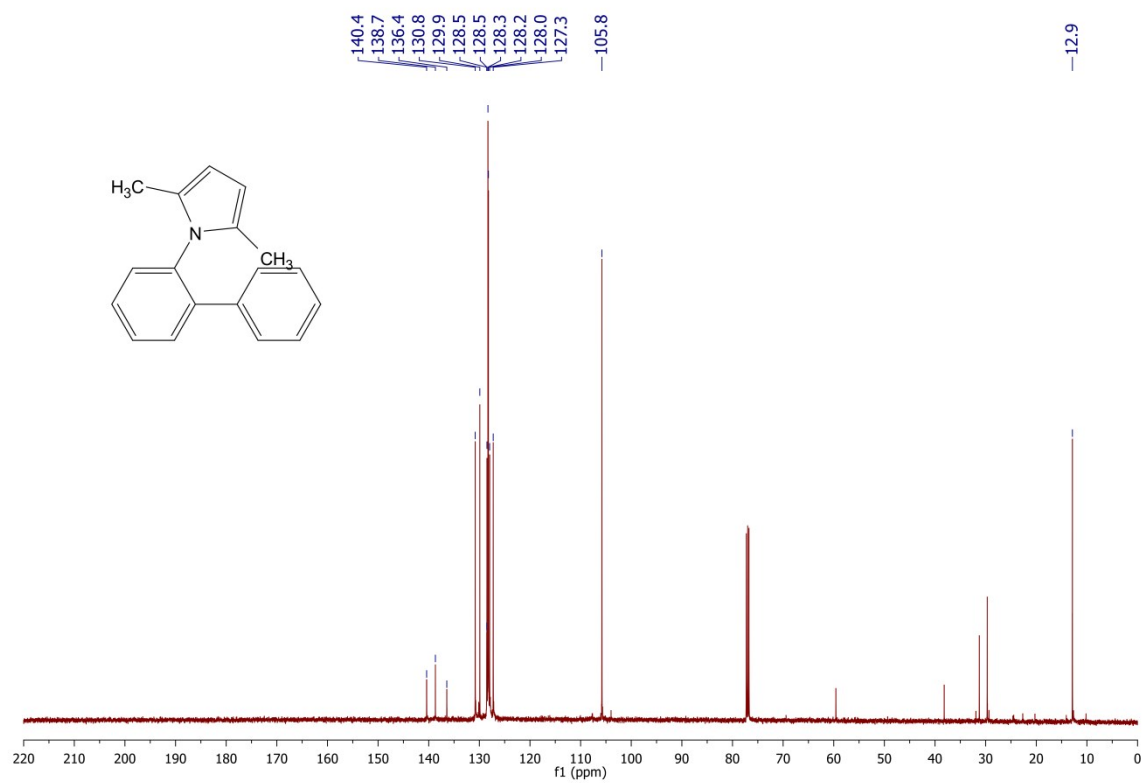



File : C:\GC-MS\2016\11.03.2016\2-AMINOBIIPHENYL-AA-DES-SA-80-2H.D  
Operator : TRUONG HAI  
Acquired : 3 Nov 2016 14:21 using AcqMethod ACYLATION-SHORT-DELAY-3MIN.M  
Instrument : GCMSD  
Sample Name: 2-AMINOBIIPHENYL-AA-DES-SA-80-2H  
Misc Info :  
Vial Number: 8

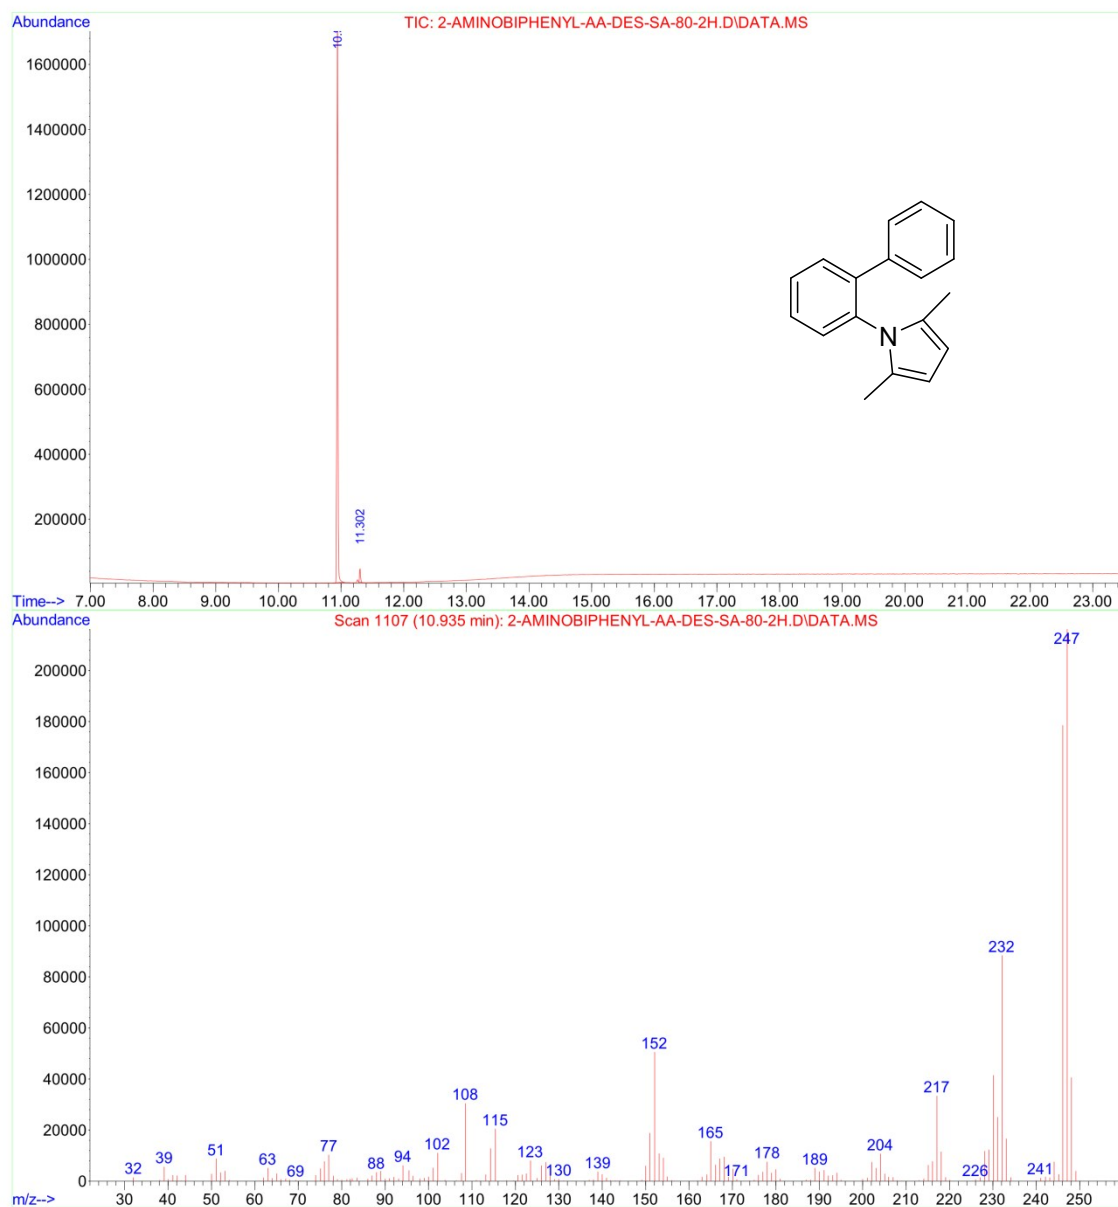

# <sup>1</sup>H NMR, <sup>13</sup>C NMR, and GC-MS of methyl 4-(2,5-dimethyl-1H-pyrrol-1-yl)benzoate

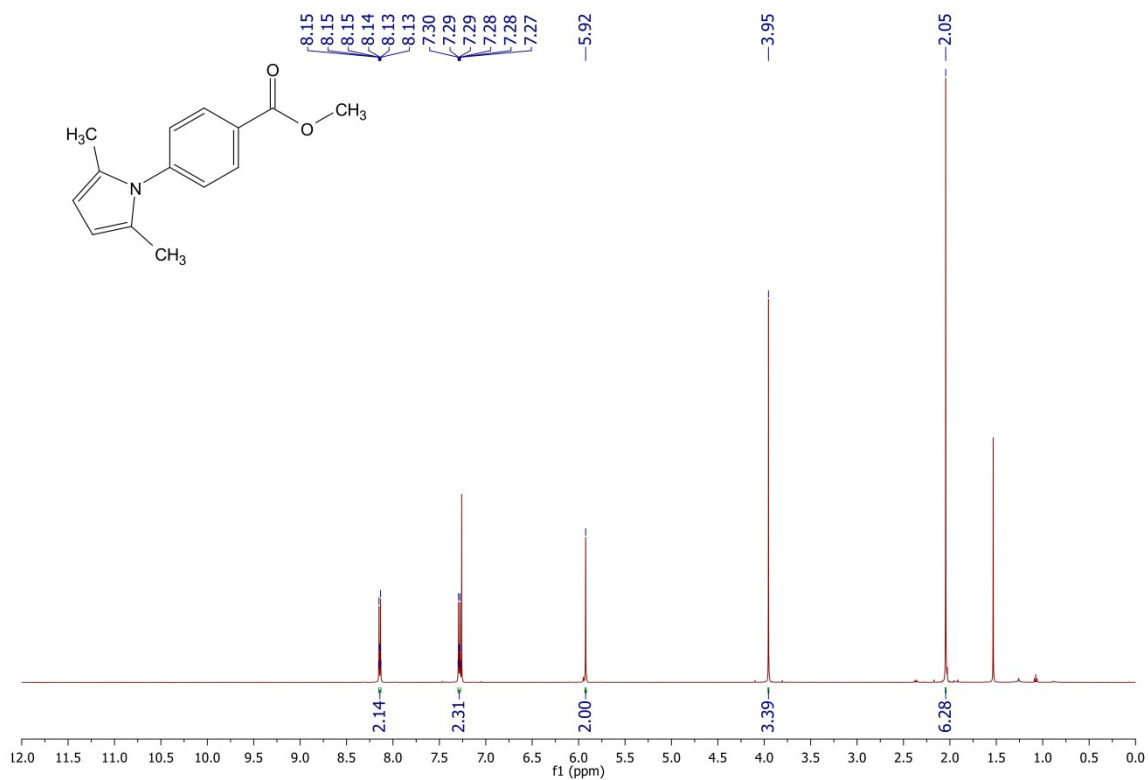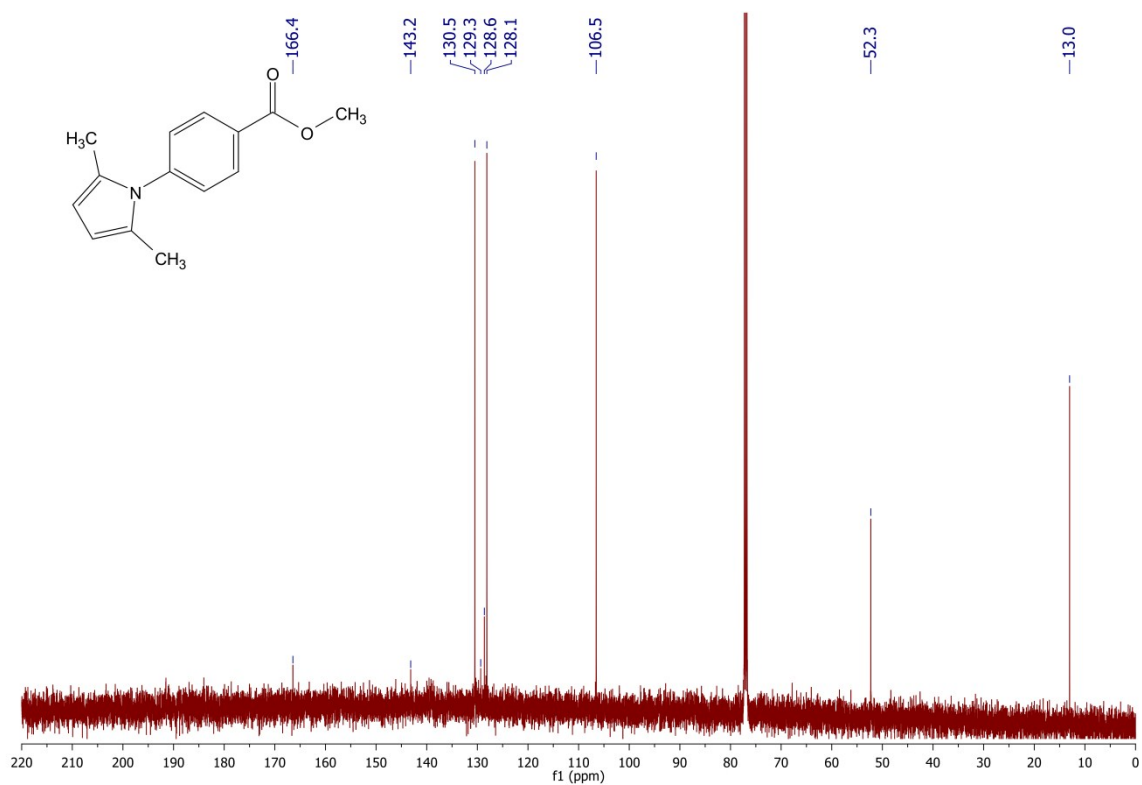

File : C:\GC-MS\2016\11.22.2016\METHYL-4-AMINO BENZOIC-AA-DES-SA-80-  
... 2H.D  
Operator : TRUONG HAI  
Instrument : GCMSD  
Acquired : 22 Nov 2016 15:13 using AcqMethod ACYLATION-SHORT-DELAY-3MIN.M  
Sample Name: METHYL-4-AMINO BENZOIC-AA-DES-SA-80-2H  
Misc Info :

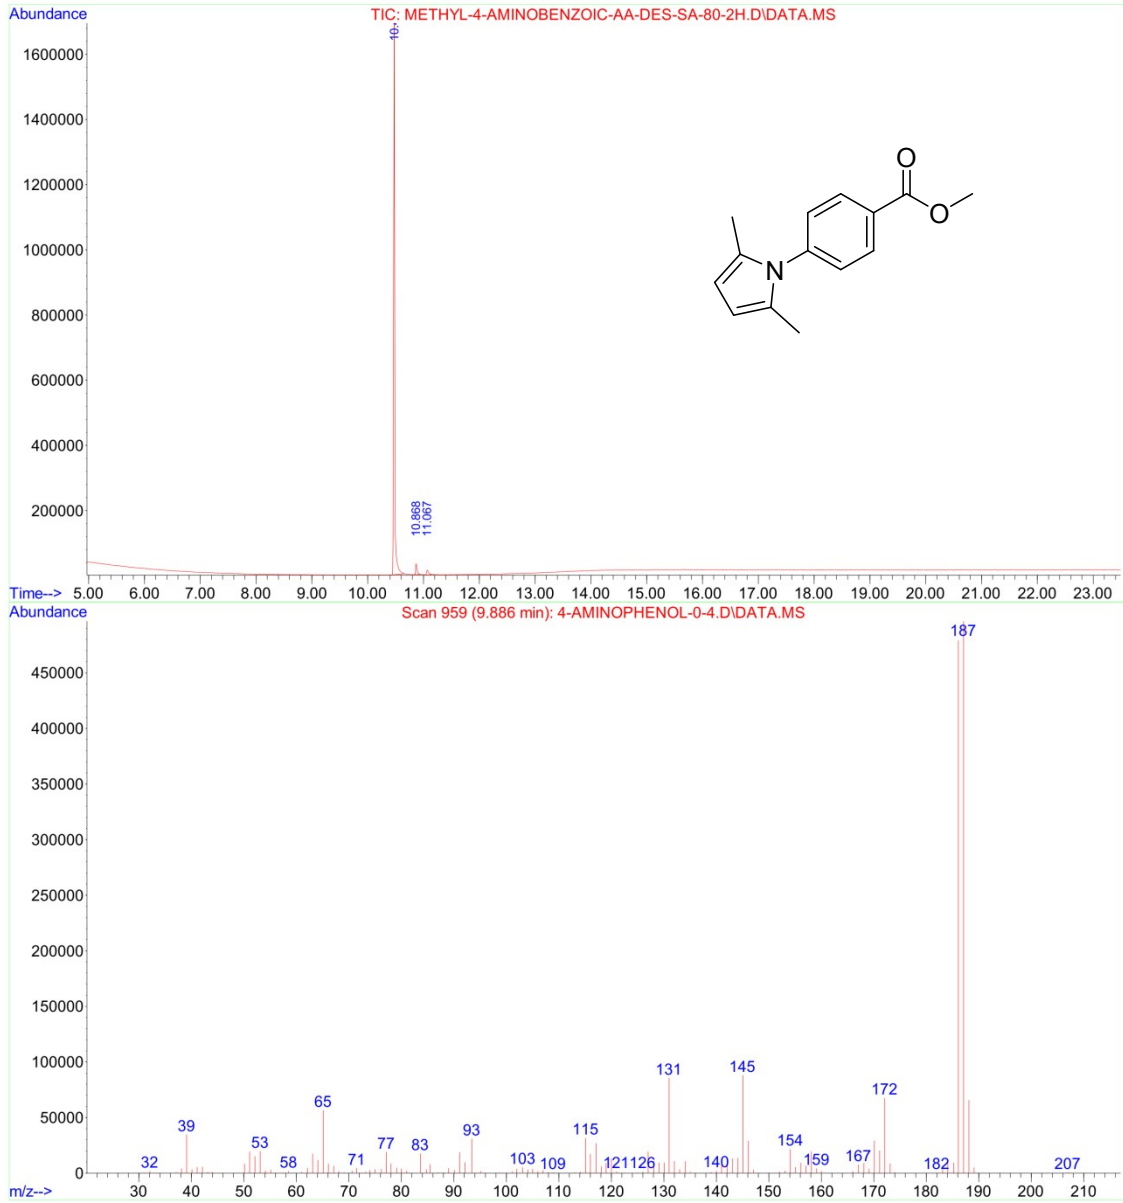

# $^1\text{H}$ NMR, $^{13}\text{C}$ NMR, and GC-MS of 1-(4-cyanophenyl)-2,5-Dimethyl-1*H*-pyrrole

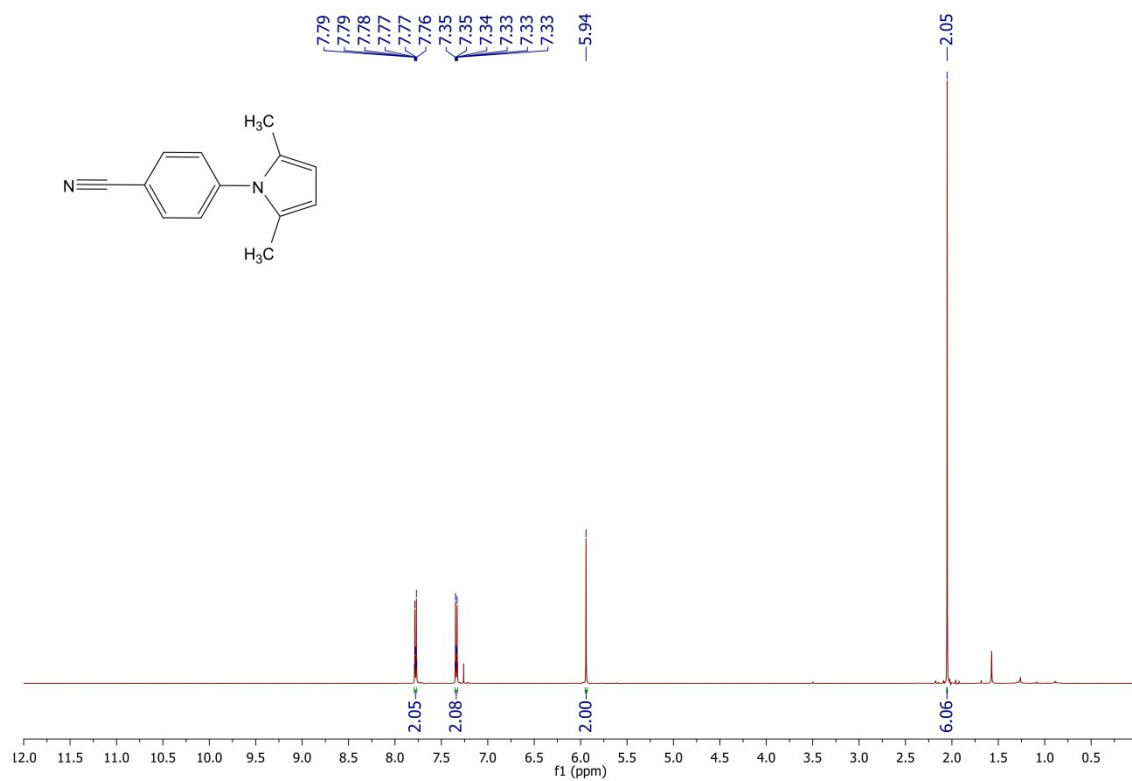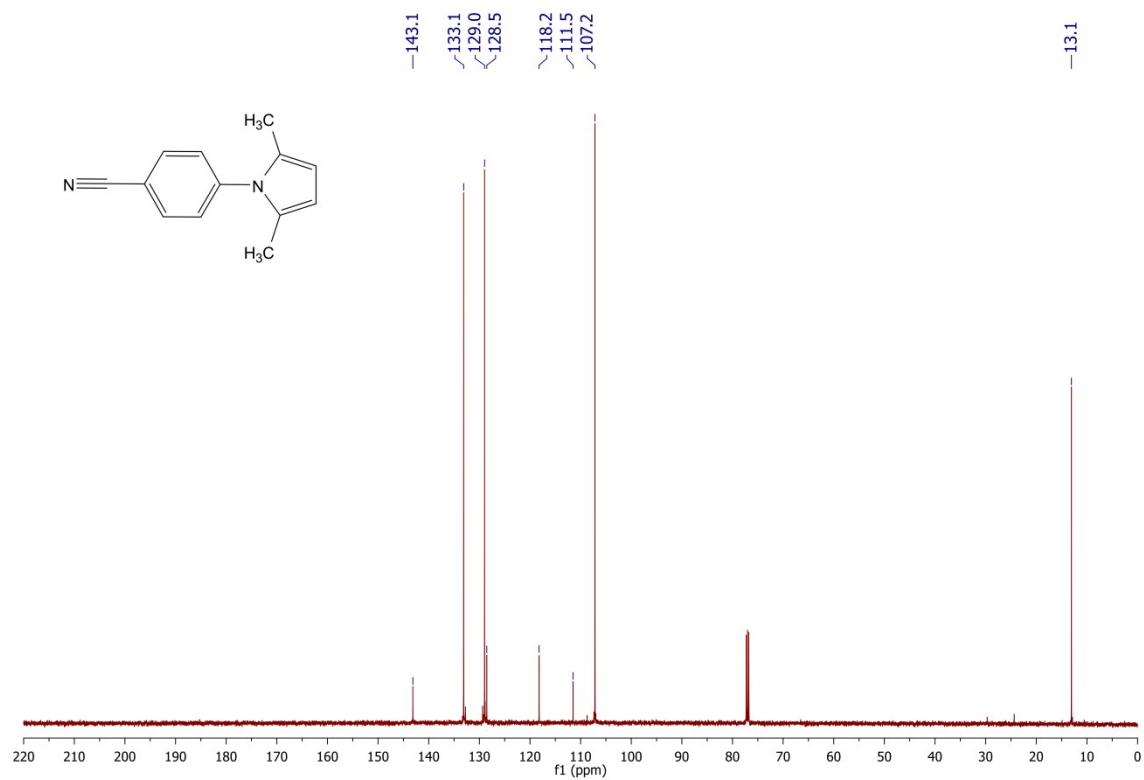

File :C:\GC-MS\2016\11.23.2016\4-AMINOENZITRILE-AA-DES-SA-80-2H.D  
Operator : TRUONG HAI  
Acquired : 24 Nov 2016 8:50 using AcqMethod ACYLATION-SHORT-DELAY-3MIN.M  
Instrument : GCMSD  
Sample Name: 4-AMINOENZITRILE-AA-DES-SA-80-2H  
Misc Info :  
Vial Number: 1

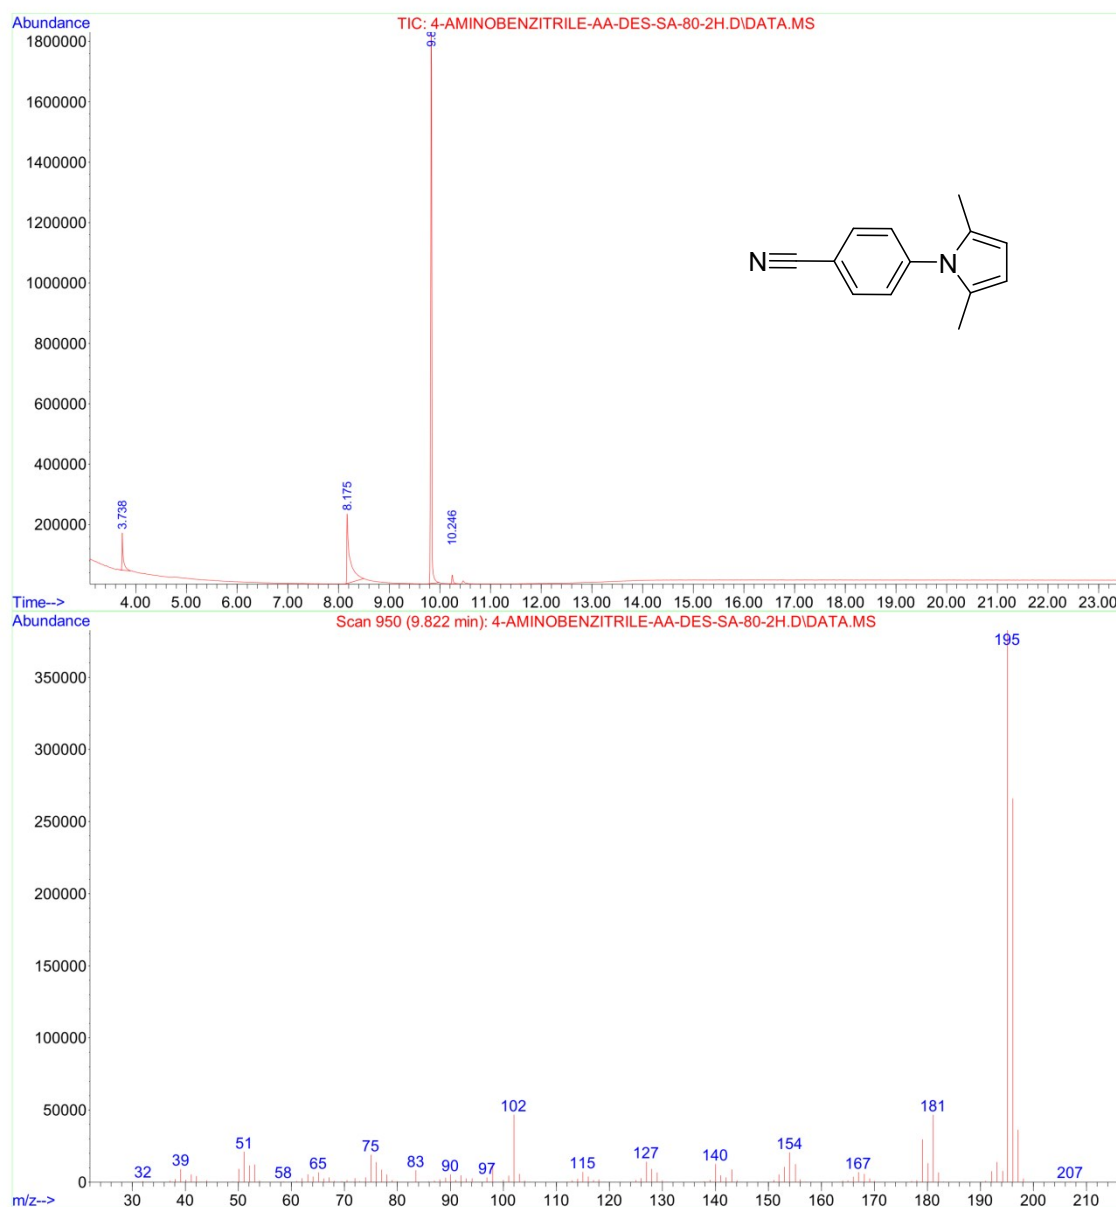

# $^1\text{H}$ NMR, $^{13}\text{C}$ NMR, and GC-MS of 2,5-dimethyl-1-(4-nitrophenyl)-1*H*-pyrrole

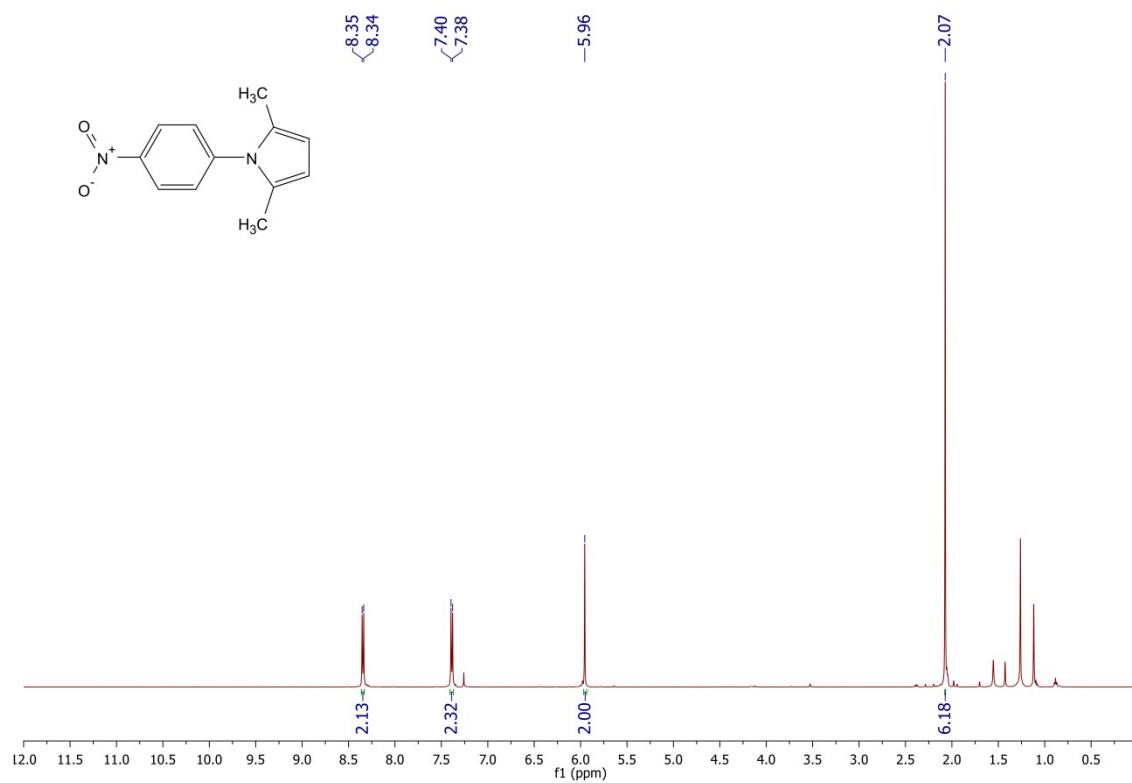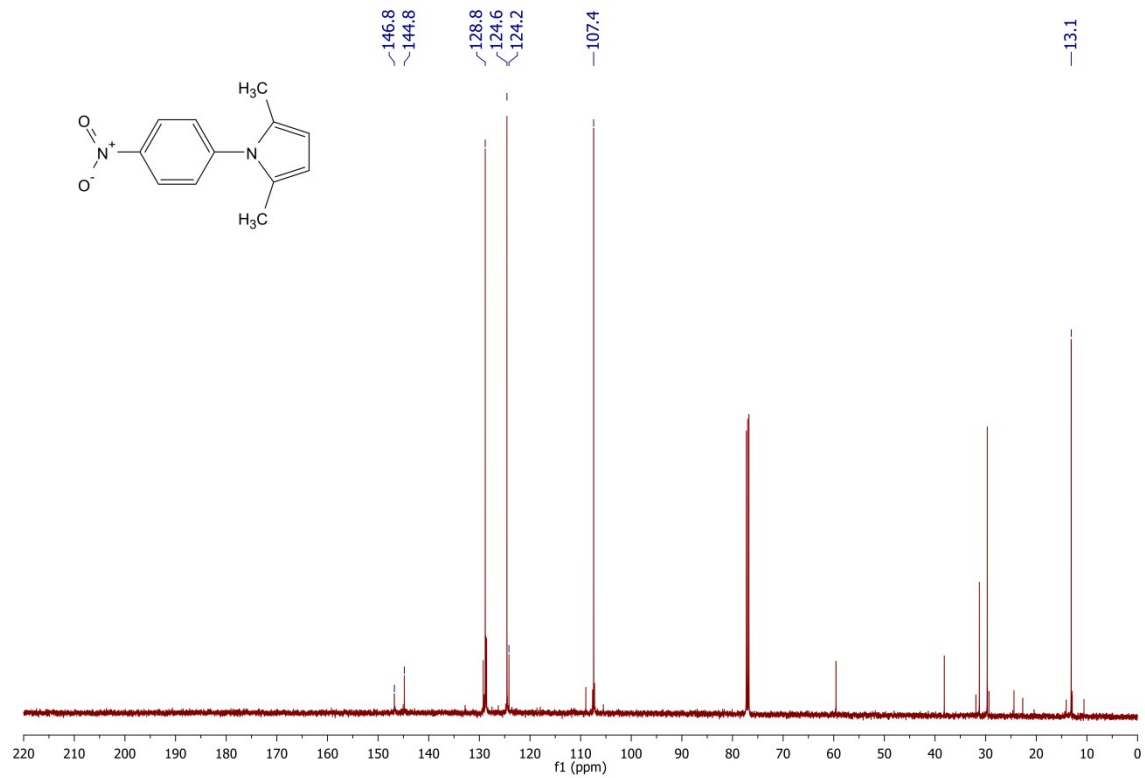

File : C:\GC-MS\2016\11.07.2016\4-NITROANILINE-AA-DES-SA-80-2H.D  
Operator : Thao Tran  
Acquired : 7 Nov 2016 18:27 using AcqMethod ACYLATION-SHORT-DELAY-3MIN.M  
Instrument : GCMSD  
Sample Name: 4-NITROANILINE-AA-DES-SA-80-2H  
Misc Info :  
Vial Number: 1

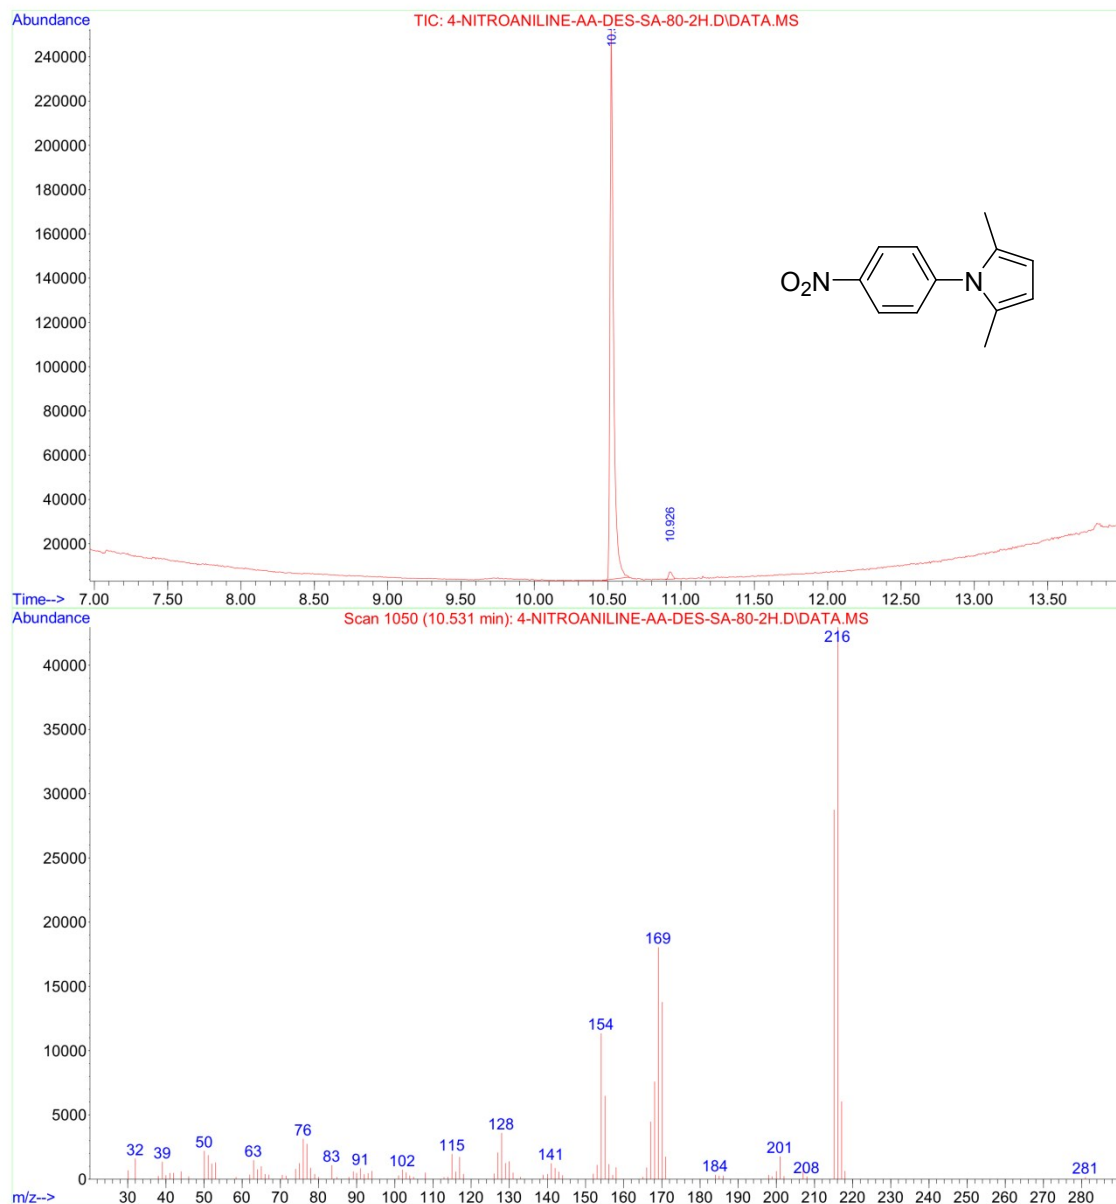

# $^1\text{H}$ NMR, $^{13}\text{C}$ NMR, and GC-MS of *N*-(2,4-dinitrophenyl)-2,5-dimethyl-1*H*-pyrrol-1-amine

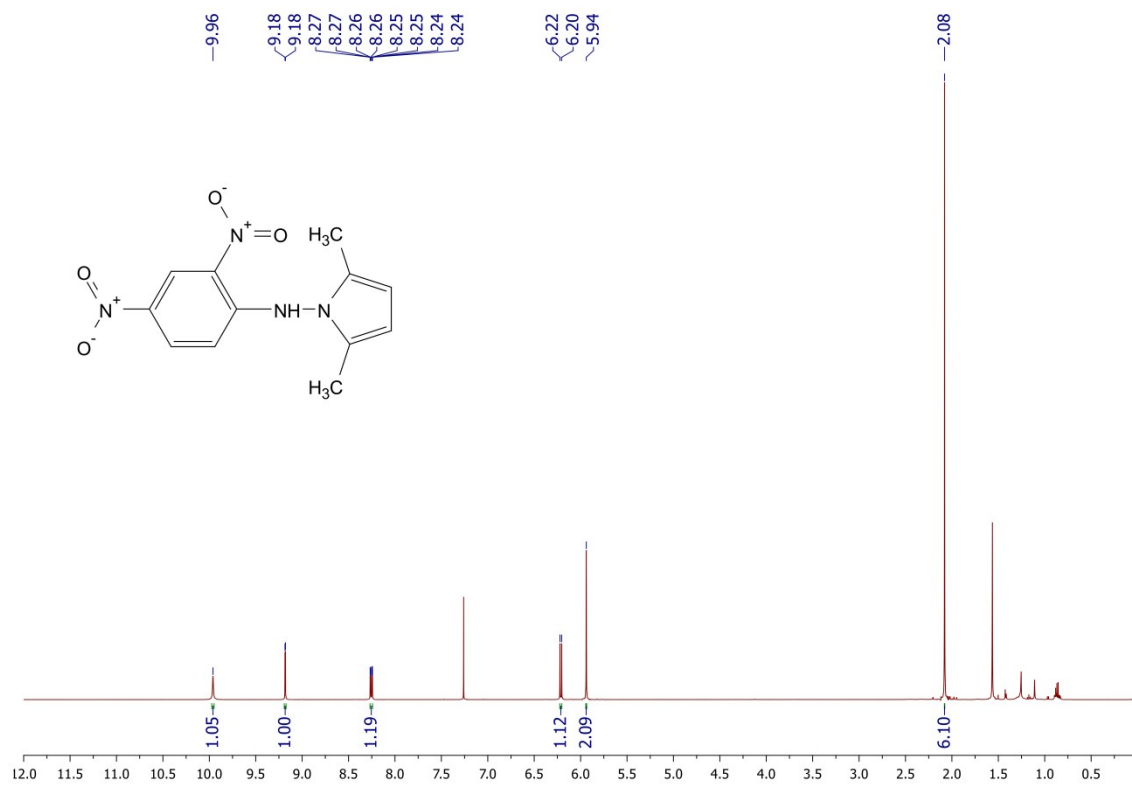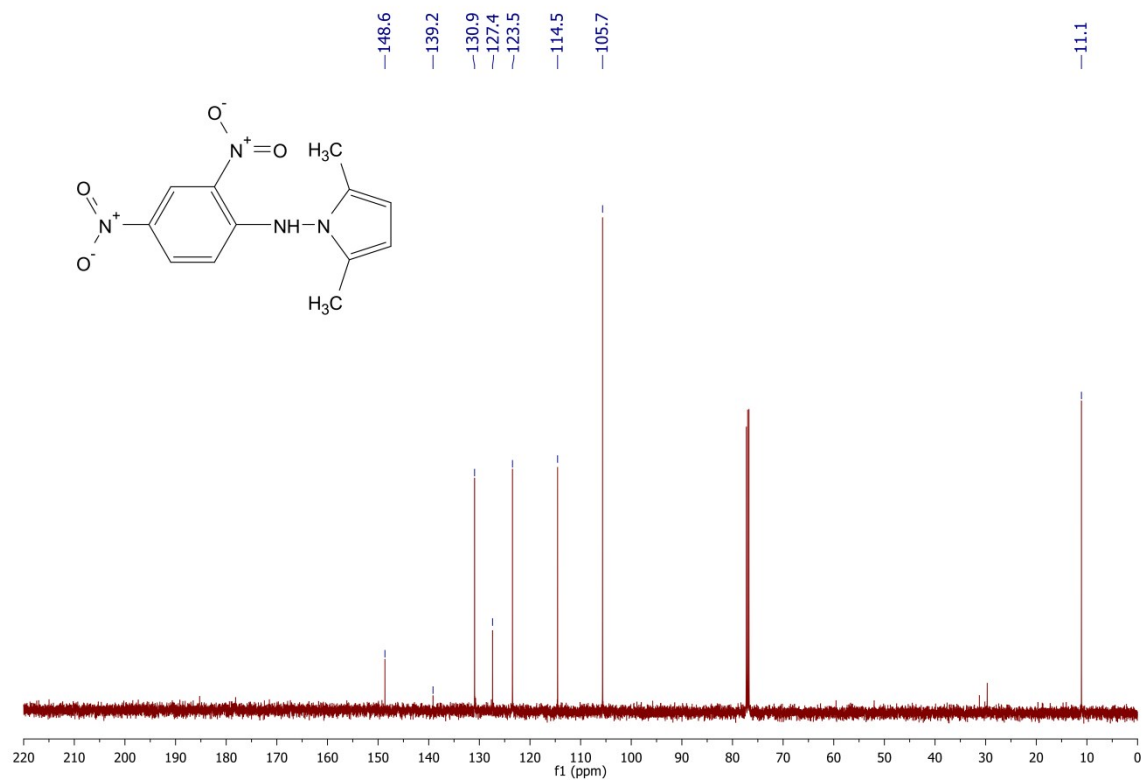



# $^1\text{H}$ NMR, $^{13}\text{C}$ NMR, and GC-MS of 2,5-dimethyl-*N*-phenyl-1*H*-pyrrol-1-amine

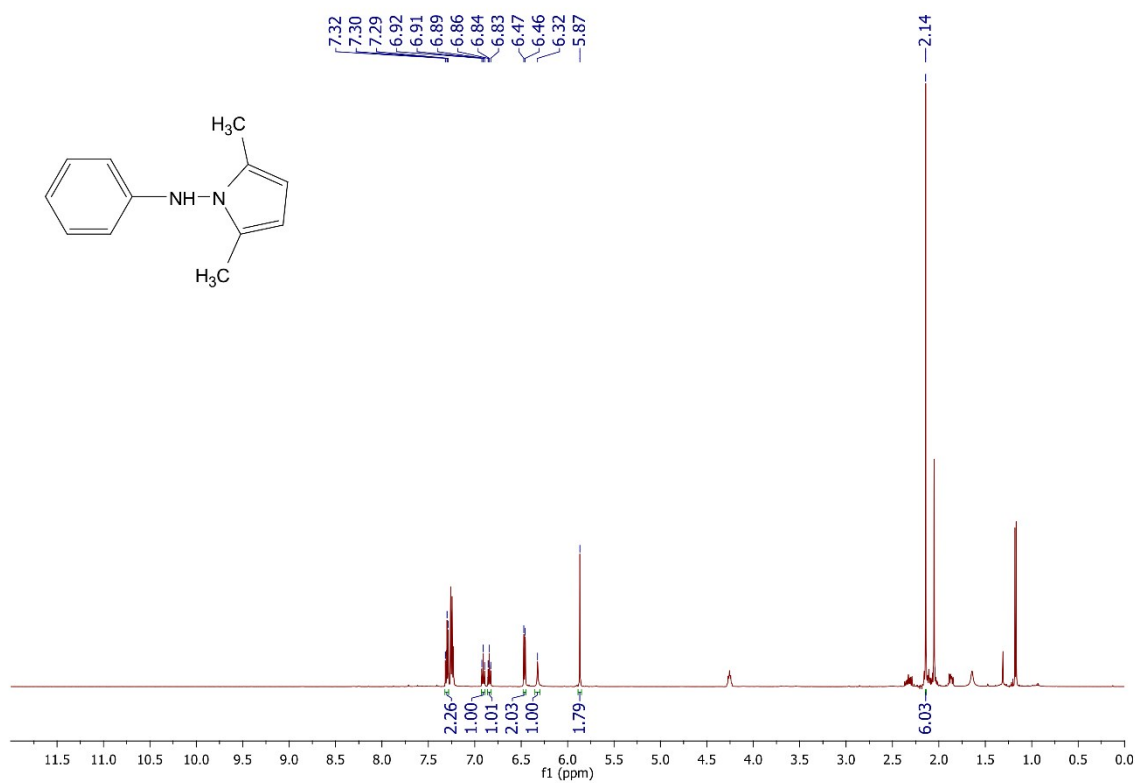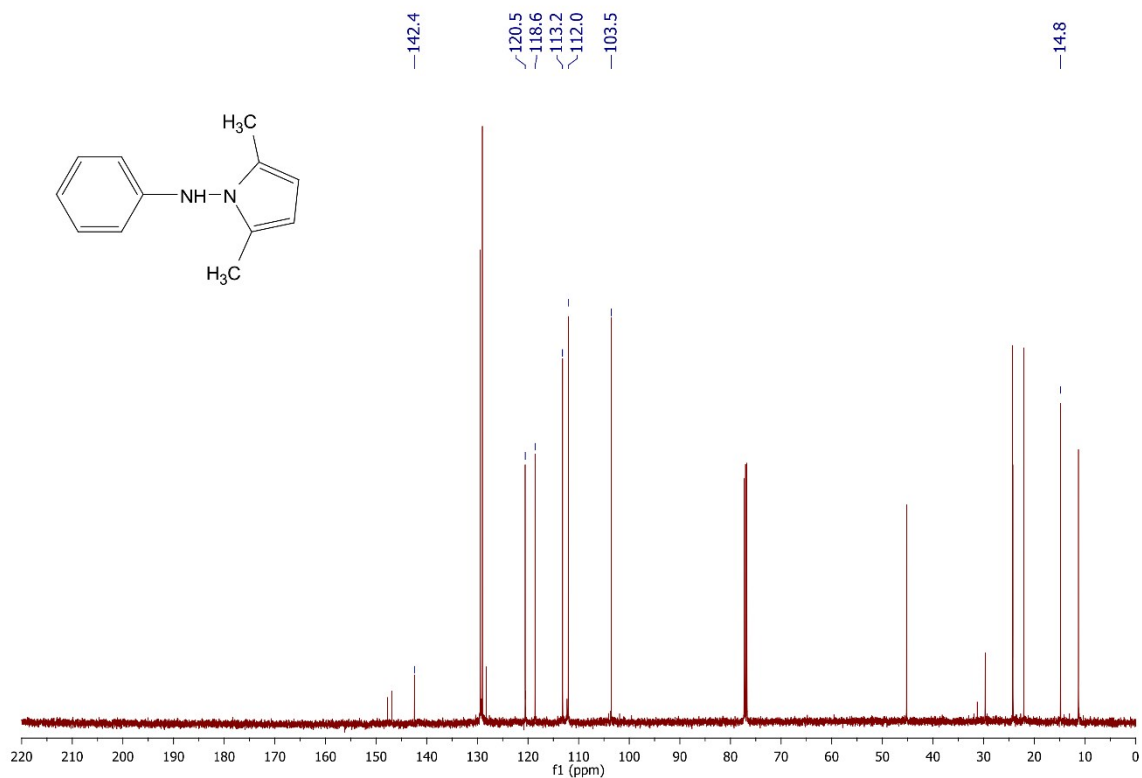

File : C:\GC-MS\2016\11.13.2016\PHENYLHYDRAZINE-AA-DES-SA-80-2H.D  
Operator : TRUONG HAI  
Acquired : 13 Nov 2016 12:51 using AcqMethod ACYLATION-SHORT-DELAY-3MIN.M  
Instrument : GCMSD  
Sample Name: PHENYLHYDRAZINE-AA-DES-SA-80-2H  
Misc Info :  
Vial Number: 3

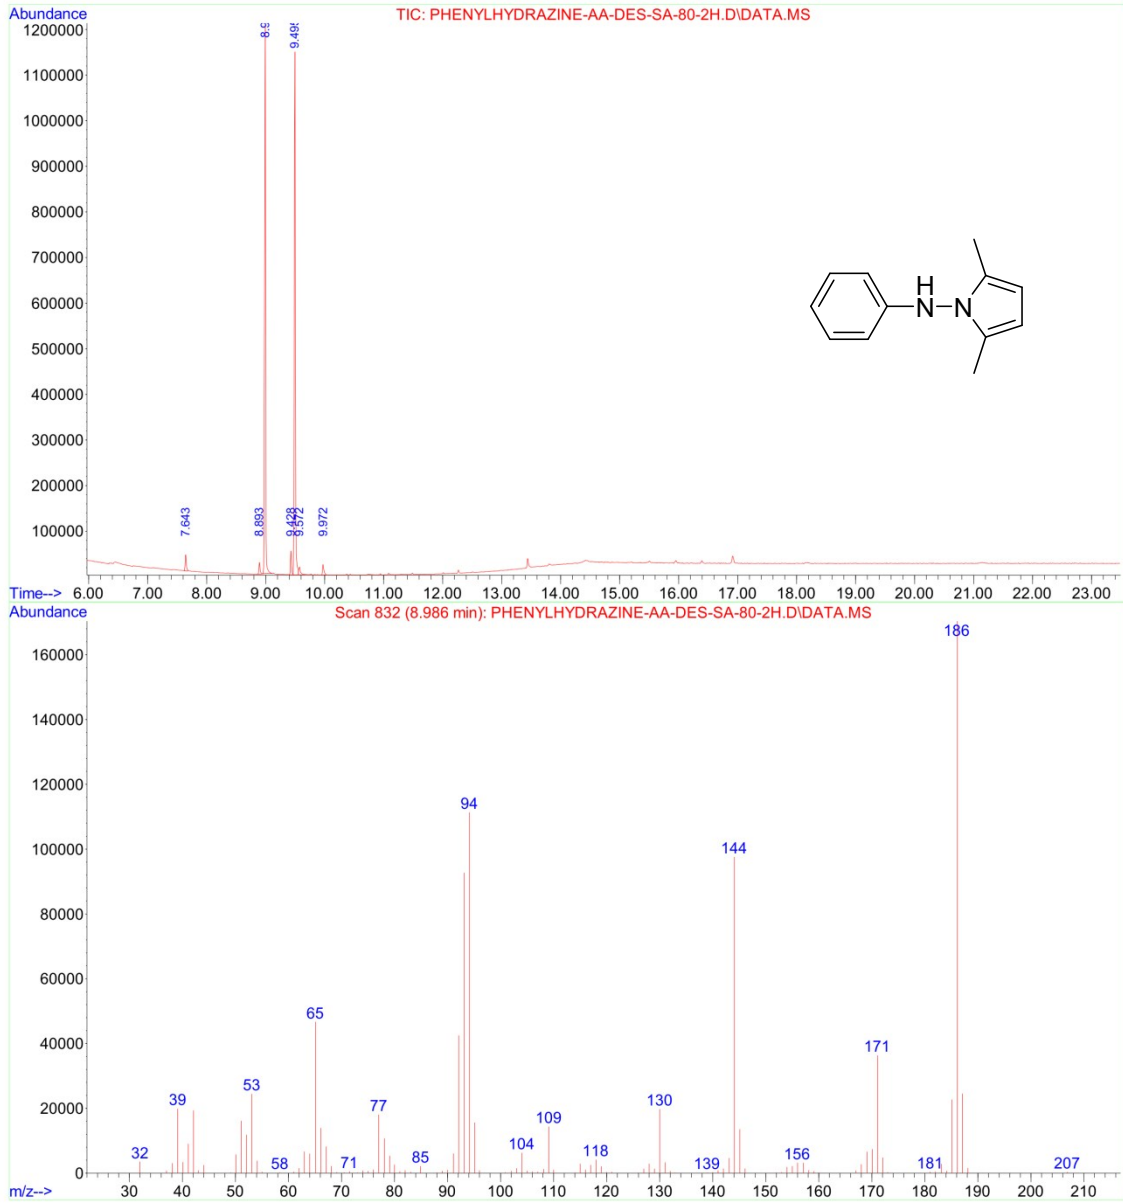

$^1\text{H}$  NMR,  $^{13}\text{C}$  NMR, and HRMS of  $N_1,N_2$ -bis(2-(2,5-Dimethyl-1*H*-pyrrol-1-yl)ethyl)ethane-1,2-diamine

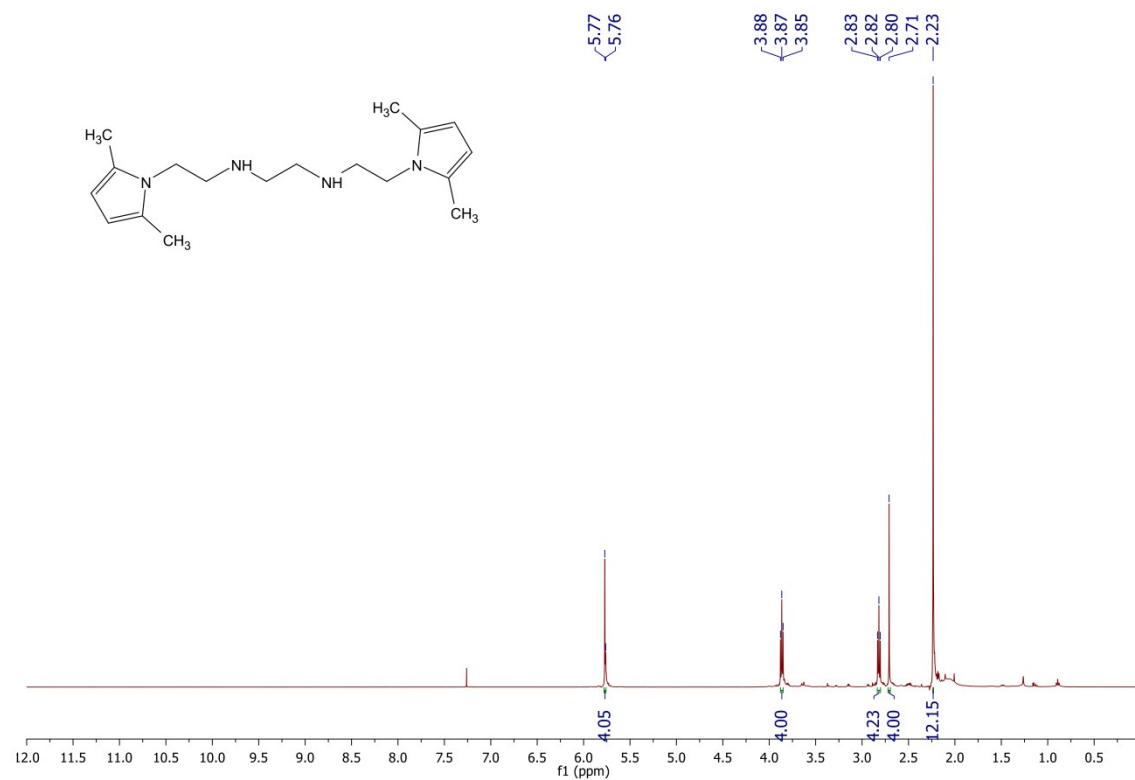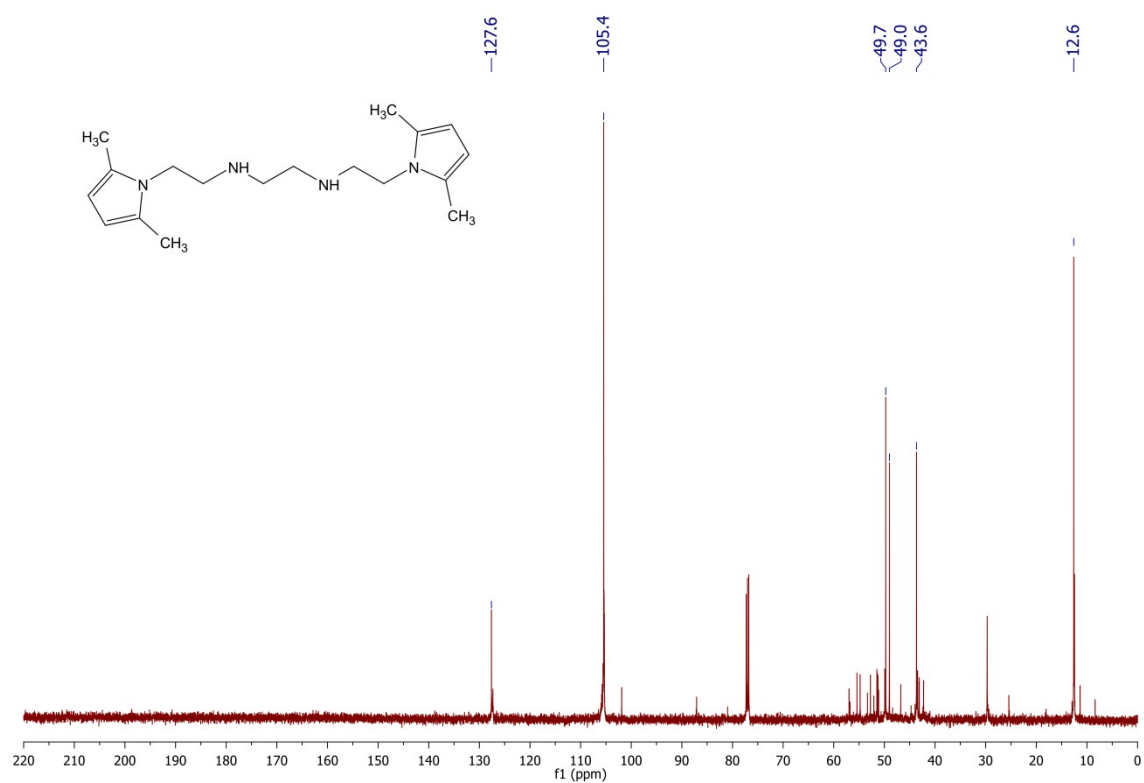

# Display Report

## Analysis Info

Analysis Name D:\Data\2016\triet\_1-a,8\_01\_2245.d  
Method dmm 2017.m  
Sample Name triet  
Comment

Acquisition Date 12/28/2016 11:47:51 PM

Operator Anh Mai  
Instrument micrOTOF-Q 10187

## Acquisition Parameter

|             |          |                       |           |                  |           |
|-------------|----------|-----------------------|-----------|------------------|-----------|
| Source Type | ESI      | Ion Polarity          | Positive  | Set Nebulizer    | 1.2 Bar   |
| Focus       | Active   | Set Capillary         | 4000 V    | Set Dry Heater   | 200 °C    |
| Scan Begin  | 50 m/z   | Set End Plate Offset  | -500 V    | Set Dry Gas      | 9.0 l/min |
| Scan End    | 1000 m/z | Set Collision Cell RF | 450.0 Vpp | Set Divert Valve | Source    |

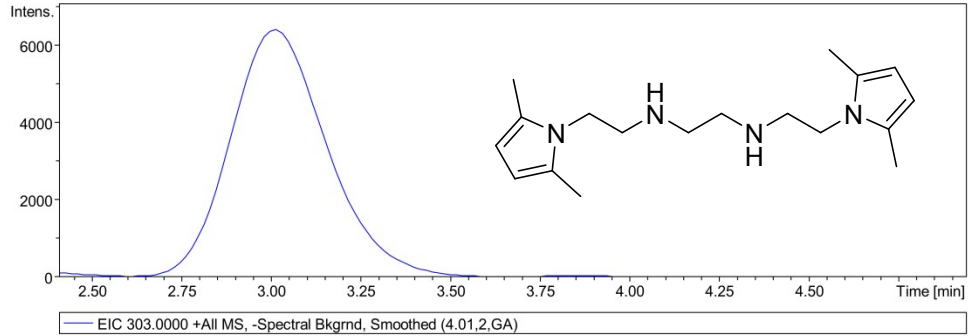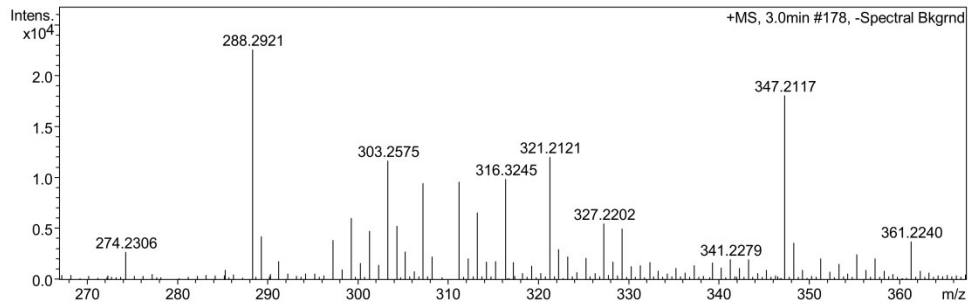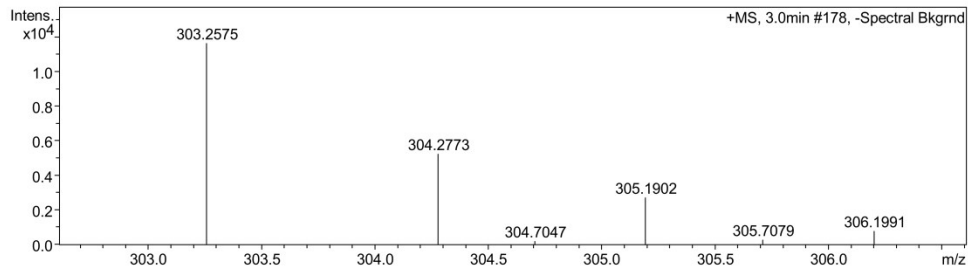

## Section S6. References

1. K. Aghapoor, L. Ebadi-Nia, F. Mohsenzadeh, M. Mohebi Morad, Y. Balavar and H. R. Darabi, *J. Organomet. Chem.*, 2012, **708–709**, 25-30.
2. K. A. Hossein Reza Darabi, Abbas Darestani Farahani, Farshid Mohsenzadeh, *Environ. Chem. Lett.*, 2012, **10**, 369-375.
3. H. Cho, R. Madden, B. Nisanci and B. Torok, *Green Chem.*, 2015, **17**, 1088-1099.
4. F. M. Kioumars Aghapoor, Hossein Reza Darabi, Hani Sayahi, Yadollah Balavar, *Res. Chem. Intermed.*, 2016, **42**, 407-415.
5. M. R. P. Hossein Reza Darabi, Kioumars Aghapoor, Asyeh Mirzaee, Farshid Mohsenzadeh, Nazafarin Asadollahnejad, Hossein Taherzadeh, Yadollah Balavar, *Environ. Chem. Lett.*, 2012, **10**, 5–12.
6. S. S. Bimal K. Banik , Indrani Banik, *J. Org. Chem.*, 2004, **69**, 213-216.
7. A. Rahmatpour, *J. Organomet. Chem.*, 2012, **712**, 15-19.
8. M. A. V. R. d. S. Ana Filipa L. O. M. Santos, *Struct. Chem.*, 2013, **24**, 1981-1992.
9. S. J. H. Hazlewood, Gordon K.; Lions, Francis; Baldick, Kenric J.; Cornforth, John W.; Graves, John N.; Maunsell, James J.; Wilkinson, Thomas; Birch, Arthur J.; Harradence, Rita H., *Journal and Proceedings of the Royal Society of New South Wales*, 1937, **71**, 92-102.
10. P. Grammaticakis, *Comptes Rendus des Seances de l'Academie des Sciences, Serie C: Sciences Chimiques* 1971, **272**, 1574-1547.
11. H. A. Akio Ohsawa, Hiroshi Igeta, Toshio Akimoto, Akio Tsuji, Yoichi Iitaka, *J. Org. Chem.*, 1979, **44**, 3524–3529.
12. S. S. Haifeng Duan, Jeffrey L. Petersen, Novruz G. Akhmedov, Xiaodong Shi, *J. Am. Chem. Soc.*, 2009, **131**, 12100–12102.
13. P.-Y. J. Ming-Zhong Zhang, Yu-Feng Liu, and Can-Cheng Guo, *J. Org. Chem.*, 2015, **80**, 10777–10786.
14. T. D. Binns and R. Brettle, *Journal of the Chemical Society C: Organic*, 1966, DOI: 10.1039/J39660000341, 341-343.
15. T. Zsolnai, *Biochem. Pharmacol.*, 1961, **5**, 387-304.

16. K. N. D. Zelenin, J., *Zhurnal Organicheskoi Khimii* 1973, **9**, 1295-1304.
17. J. Chen, H. Wu, Z. Zheng, C. Jin, X. Zhang and W. Su, *Tetrahedron Lett.*, 2006, **47**, 5383-5387.
18. Liudvikas Akelis, Jolanta Rousseau, Robertas Juskenas, Jelena Dodonova, Cyril Rousseau, Stéphane Menuel, Dominique Prevost, Sigitas Tumkevičius, Eric Monflier and F. Hapiot, *Eur. J. Org. Chem.*, 2015, **2016**, 31-35.
19. S. Handy and K. Lavender, *Tetrahedron Lett.*, 2013, **54**, 4377-4379.
20. M. Curini, F. Montanari, O. Rosati, E. Lioy and R. Margarita, *Tetrahedron Lett.*, 2003, **44**, 3923-3925.
21. H. M. Abbas Ali Jafari, *Environ. Chem. Lett.*, 2013, **11**, 157-162.
22. X. Chen, M. Yang and M. Zhou, *Tetrahedron Letters*, 2016, **57**, 5215-5218.
23. S. K. Amit Walia, Richard B Silverman, *J. Org. Chem.*, 2013, **78**, 10931–10937.
24. K. M. Noberini R, Peddibhotla S, Dahl R, Su Y, Cosford ND, Roth GP, Pasquale EB., *J Biol Chem.*, 2008, **283**, 29461-29472.
25. P. D. A. Marina Porcelloni, Cristina Rossi, Alessandro Sisto, Alessandro Ettore, Andrea Madami, Maria Altamura, Sandro Giuliani, Stefania Meini, Daniela Fattori, *ChemMedChem*, 2008, **3**, 1048–1060.
